# Supplementary material for: Cyclic alkyl(amino)iminates (CAAIs) as strong 2σ,4π-electron donor ligands for the stabilisation of boranes and diboranes(4): a synthetic and computational study
Source: Royal Society of Chemistry journal article supplement (doi:10.1039/d3dt00298e), 2023-01-01
Supplement: d3dt00298e1.pdf [file d3dt00298e1.pdf]

Supporting Information for

# **Cyclic Alkyl(amino)iminates (CAAls) as Strong $2\sigma,4\pi$ - Electron Donor Ligands for the Stabilisation of Boranes and Diboranes(4): A Synthetic and Computational Study**

Silvia Huynh,<sup>a,b</sup> Merle Arrowsmith,<sup>a,b</sup> Lukas Meier,<sup>a,b</sup> Maximilian Dietz,<sup>a,b</sup> Marcel Härterich,<sup>a,b</sup>  
Maximilian Michel,<sup>a,b</sup> Annalena Gärtner,<sup>a,b</sup> and Holger Braunschweig<sup>a,b</sup>

<sup>a</sup> *Institute for Inorganic Chemistry, Julius-Maximilians-Universität Würzburg, Am Hubland, 97074 Würzburg, Germany.*

<sup>b</sup> *Institute for Sustainable Chemistry & Catalysis with Boron, Julius-Maximilians-Universität Würzburg, Am Hubland, 97074 Würzburg, Germany.*

## **Contents**

|                                         |    |
|-----------------------------------------|----|
| Methods and materials .....             | 2  |
| Synthetic Procedures .....              | 3  |
| NMR spectra of isolated compounds ..... | 11 |
| IR spectra.....                         | 56 |
| X-ray crystallographic data .....       | 58 |
| Computational details.....              | 73 |
| Cartesian coordinates .....             | 75 |
| References .....                        | 88 |

## **Methods and materials**

All manipulations were performed either under an atmosphere of dry argon (Argon 5.0) or *in vacuo* using standard Schlenk line or glovebox techniques. The solvents used were dried over suitable drying agents, distilled under an argon atmosphere, and stored under argon over activated molecular sieves (4 Å). Deuterated solvents were dried over molecular sieves (4 Å or 3 Å) and degassed by three freeze-pump-thaw cycles prior to use. NMR spectra were acquired either on a Bruker Avance 400 ( $^{11}\text{B}$ :128.5 MHz) or a Bruker Avance 500 ( $^1\text{H}$ : 500.1 MHz,  $^{11}\text{B}$ : 160.5 MHz,  $^{13}\text{C}$ : 125.8 MHz) spectrometer. Chemical shifts ( $\delta$ ) are listed in ppm, and internally referenced to the carbon nuclei ( $^{13}\text{C}\{^1\text{H}\}$ ) or residual protons ( $^1\text{H}$ ) of the solvent. Heteronuclei NMR spectra are referenced to external standards ( $^{11}\text{B}$ :  $\text{BF}_3\cdot\text{OEt}_2$ ). Resonances are given as singlet (s), doublet (d), triplet (t), septet (sept) or multiplet (m). The signals were assigned using standard 2D NMR experiments. High-resolution mass spectrometry (HRMS) data were determined from a Thermo Scientific Exactive Plus spectrometer. FT-IR spectra (solid-state) were recorded on a Bruker FT-IR spectrometer ALPHA II inside a glovebox.

Solvents and reagents were purchased from Sigma-Aldrich, ABCR or Alfa Aesar. (CAAC)NSiMe<sub>3</sub> (**1**, CAAC = 1-(2,6-diisopropylphenyl)-3,3,5,5-tetramethylpyrrolidin-2-ylidene),<sup>1</sup> CIB(NMe<sub>2</sub>)<sub>2</sub>,<sup>2</sup> BrB(NMe<sub>2</sub>)<sub>2</sub>,<sup>2</sup> DurBCl<sub>2</sub> (Dur = 2,3,5,6-tetramethylphenyl),<sup>3</sup> MesBBr<sub>2</sub> (Mes = 2,4,6-trimethylphenyl),<sup>4</sup> PhBBr<sub>2</sub>,<sup>5</sup> BCl<sub>3</sub>(SMe<sub>2</sub>),<sup>6</sup> BBr<sub>3</sub>(SMe<sub>2</sub>),<sup>6</sup> B<sub>2</sub>Cl<sub>2</sub>(NMe<sub>2</sub>)<sub>2</sub>,<sup>7</sup> B<sub>2</sub>Br<sub>2</sub>(NMe<sub>2</sub>)<sub>2</sub>,<sup>7</sup> B<sub>2</sub>Mes<sub>2</sub>Cl<sub>2</sub>,<sup>8,9</sup> were synthesized using known literature procedures.

## Synthetic Procedures

### Synthesis of 2<sup>Cl</sup>-NMe<sub>2</sub>

To a solution of **1** (500 mg, 1.34 mmol) in benzene (7 mL) ClB(NMe<sub>2</sub>)<sub>2</sub> (271 mg, 2.01 mmol) was added dropwise. After stirring at room temperature overnight, all volatiles were removed *in vacuo*. Extraction with hexane (7 × 5 mL), removal of the solvent and drying *in vacuo* afforded 2<sup>Cl</sup>-NMe<sub>2</sub> (418 mg, 80%). Colourless crystals suitable for X-ray diffraction analysis were obtained by slow evaporation of a saturated hexane solution at room temperature. <sup>1</sup>H{<sup>11</sup>B} NMR (500.1 MHz, C<sub>6</sub>D<sub>6</sub>, 297 K): δ = 7.21 (t, 1H, <sup>3</sup>J = 7.8, 8.4 Hz, *p*-CH<sup>Dip</sup>), 7.16-7.09 (m, 2H, *m*-CH<sup>Dip</sup>), 3.12 (sept, 2H, <sup>3</sup>J = 6.7 Hz, CH(CH<sub>3</sub>)<sub>2</sub><sup>Dip</sup>), 2.79 (br s, 3H, N(CH<sub>3</sub>)<sub>2</sub>), 2.50 (br s, 3H, N(CH<sub>3</sub>)<sub>2</sub>), 1.72 (s, 2H, CH<sub>2</sub><sup>CAAC</sup>), 1.34 (d, 6H, <sup>3</sup>J = 6.6 Hz, CH(CH<sub>3</sub>)<sub>2</sub><sup>Dip</sup>), 1.30 (s, 6H, CH<sub>3</sub><sup>CAAC</sup>), 1.25 (d, 6H, <sup>3</sup>J = 6.9 Hz, CH(CH<sub>3</sub>)<sub>2</sub><sup>Dip</sup>), 1.00 (s, 6H, CH<sub>3</sub><sup>CAAC</sup>) ppm. <sup>13</sup>C{<sup>1</sup>H} NMR (125.8 MHz, C<sub>6</sub>D<sub>6</sub>, 297 K): δ = 163.6 (C=N<sup>CAAC</sup>), 149.2 (*o*-C<sub>q</sub><sup>Dip</sup>), 132.2 (*i*-C<sub>q</sub><sup>Dip</sup>), 128.2 (*p*-CH<sup>Dip</sup>), 123.9 (*m*-CH<sup>Dip</sup>), 60.8 (C<sub>q</sub><sup>CAAC</sup>), 51.6 (CH<sub>2</sub><sup>CAAC</sup>), 42.1 (C<sub>q</sub><sup>CAAC</sup>), 29.4 (CH<sub>3</sub><sup>CAAC</sup>), 28.8 (CH(CH<sub>3</sub>)<sub>2</sub><sup>Dip</sup>), 28.2 (CH<sub>3</sub><sup>CAAC</sup>), 27.1 (CH(CH<sub>3</sub>)<sub>2</sub><sup>Dip</sup>), 23.1 (CH(CH<sub>3</sub>)<sub>2</sub><sup>Dip</sup>) ppm. <sup>11</sup>B NMR (160.5 MHz, C<sub>6</sub>D<sub>6</sub>, 297 K): δ = 26.7 (s) ppm. Elemental analysis for [C<sub>22</sub>H<sub>37</sub>BClN<sub>3</sub>] (*M<sub>w</sub>* = 389.82 g mol<sup>-1</sup>): calcd. C 67.79, H 9.57, N 10.78%; found C 67.37, H 9.66, N 10.52%. HRMS LIFDI for [C<sub>22</sub>H<sub>37</sub>BClN<sub>3</sub>] (*m/z*): calcd. 389.2764, found 389.2757.

### Synthesis of 2<sup>Br</sup>-NMe<sub>2</sub>

**1** (300 mg, 810 μmol) was dissolved in benzene (4 mL) and BrB(NMe<sub>2</sub>)<sub>2</sub> (217 mg, 1.22 mmol) was added dropwise at room temperature. The reaction mixture was stirred overnight. After removing all volatiles *in vacuo*, the product was extracted with hexane (7 × 5 mL) and dried *in vacuo* to yield 2<sup>Br</sup>-NMe<sub>2</sub> (310 mg, 89%). Single crystals suitable for X-ray diffraction analysis were obtained by slow evaporation of a saturated hexane solution at room temperature. <sup>1</sup>H{<sup>11</sup>B} NMR (500.1 MHz, C<sub>6</sub>D<sub>6</sub>, 297 K): δ = 7.20 (t, 1H, <sup>3</sup>J = 7.6 Hz, *p*-CH<sup>Dip</sup>), 7.15-7.10 (m, 2H, *m*-CH<sup>Dip</sup>), 3.18 (sept, 2H, <sup>3</sup>J = 6.6 Hz, CH(CH<sub>3</sub>)<sub>2</sub><sup>Dip</sup>), 2.27 (s, 6H, N(CH<sub>3</sub>)<sub>2</sub>), 1.70 (s, 2H, CH<sub>2</sub><sup>CAAC</sup>), 1.34 (d, 6H, <sup>3</sup>J = 6.7 Hz, CH(CH<sub>3</sub>)<sub>2</sub><sup>Dip</sup>), 1.32 (s, 6H, CH<sub>3</sub><sup>CAAC</sup>), 1.25 (d, 6H, <sup>3</sup>J = 6.7 Hz, CH(CH<sub>3</sub>)<sub>2</sub><sup>Dip</sup>), 0.98 (s, 6H, CH<sub>3</sub><sup>CAAC</sup>) ppm. <sup>13</sup>C{<sup>1</sup>H} NMR (125.8 MHz, C<sub>6</sub>D<sub>6</sub>, 297 K): δ = 163.8 (C=N<sup>CAAC</sup>), 149.6 (*o*-C<sub>q</sub><sup>Dip</sup>), 132.3 (*i*-C<sub>q</sub><sup>Dip</sup>), 128.6 (*p*-CH<sup>Dip</sup>), 124.3 (*m*-CH<sup>Dip</sup>), 61.4 (C<sub>q</sub><sup>CAAC</sup>), 51.9 (CH<sub>2</sub><sup>CAAC</sup>), 42.6 (C<sub>q</sub><sup>CAAC</sup>), 40.5-39.3 (N(CH<sub>3</sub>)<sub>2</sub>), 29.7 (CH<sub>3</sub><sup>CAAC</sup>), 29.1 (CH(CH<sub>3</sub>)<sub>2</sub><sup>Dip</sup>), 28.4 (CH<sub>3</sub><sup>CAAC</sup>), 27.8 (CH(CH<sub>3</sub>)<sub>2</sub><sup>Dip</sup>), 23.5 (CH(CH<sub>3</sub>)<sub>2</sub><sup>Dip</sup>) ppm. <sup>11</sup>B NMR (160.5 MHz, C<sub>6</sub>D<sub>6</sub>, 297 K): δ = 24. (s) ppm. Elemental analysis for [C<sub>22</sub>H<sub>37</sub>BBrN<sub>3</sub>] (*M<sub>w</sub>* = 434.27 g

mol<sup>-1</sup>): calcd. C 60.85, H 8.59, N 9.68%, found C 60.72, H 8.76, N 9.35%. HRMS LIFDI for [C<sub>22</sub>H<sub>37</sub>BBrN<sub>3</sub>] (m/z): calcd. 434.2337, found 434.2254.

### Synthesis of 2<sup>Cl</sup>-Cl

2<sup>Cl</sup>-NMe<sub>2</sub> (30.0 mg, 77.0 μmol) and BCl<sub>3</sub>(SMe<sub>2</sub>) were combined in toluene (0.6 mL). After 1 d at room temperature, the reaction mixture was filtered and dried *in vacuo*. Single crystals of 2<sup>Cl</sup>-Cl (15 mg, 51%) suitable for X-ray diffraction analysis were obtained by slow evaporation of a saturated toluene solution at room temperature. <sup>1</sup>H{<sup>11</sup>B} NMR (500.1 MHz, C<sub>6</sub>D<sub>6</sub>, 297 K): δ = 7.14 (t, 1H, <sup>3</sup>J = 7.7 Hz, *p*-CH<sup>Dip</sup>, overlaps with the peak of the solvent), 7.06-7.03 (m, 2H, *m*-CH<sup>Dip</sup>), 2.93 (sept, 2H, <sup>3</sup>J = 6.8 Hz, CH(CH<sub>3</sub>)<sub>2</sub><sup>Dip</sup>), 1.58 (s, 2H, CH<sub>2</sub><sup>CAAC</sup>), 1.33 (d, 6H, <sup>3</sup>J = 6.7 Hz, CH(CH<sub>3</sub>)<sub>2</sub><sup>Dip</sup>), 1.20-1.14 (m, 12H, CH<sub>3</sub><sup>CAAC</sup> + CH(CH<sub>3</sub>)<sub>2</sub><sup>Dip</sup>), 0.89 (s, 6H, CH<sub>3</sub><sup>CAAC</sup>) ppm. <sup>13</sup>C{<sup>1</sup>H} NMR (125.8 MHz, C<sub>6</sub>D<sub>6</sub>, 297 K): δ = 163.2 (C=N<sup>CAAC</sup>), 148.8 (*o*-C<sub>q</sub><sup>Dip</sup>), 130.6 (*i*-C<sub>q</sub><sup>Dip</sup>), 129.5 (*p*-CH<sub>Aryl</sub><sup>Dip</sup>), 124.6 (*m*-CH<sub>Aryl</sub><sup>Dip</sup>), 63.9 (C<sub>q</sub><sup>CAAC</sup>), 50.4 (CH<sub>2</sub><sup>CAAC</sup>), 43.7 (C<sub>q</sub><sup>CAAC</sup>), 29.4 (CH(CH<sub>3</sub>)<sub>2</sub><sup>Dip</sup>), 29.2 (CH<sub>3</sub><sup>CAAC</sup>), 28.3 (CH<sub>3</sub><sup>CAAC</sup>), 26.8 (CH(CH<sub>3</sub>)<sub>2</sub><sup>Dip</sup>), 23.2 (CH(CH<sub>3</sub>)<sub>2</sub><sup>Dip</sup>) ppm. <sup>11</sup>B NMR (160.5 MHz, C<sub>6</sub>D<sub>6</sub>, 297 K): δ = 24.8 (s) ppm. Elemental analysis for [C<sub>20</sub>H<sub>31</sub>BCl<sub>2</sub>N<sub>2</sub>] (M<sub>w</sub> = 381.19 g mol<sup>-1</sup>): calcd. C 63.02, H 8.20, N 7.35%; found C 62.09, H 8.63, N 6.78%. HRMS LIFDI for [C<sub>20</sub>H<sub>31</sub>BCl<sub>2</sub>N<sub>2</sub>] (m/z): calcd. 381.2030, found 381.2027.

### Synthesis of 2<sup>Cl</sup>-Dur

1 (20.0 mg, 50.0 μmol) and DurBCl<sub>2</sub> (11.5 mg, 50.0 μmol) were combined in benzene (0.6 mL). After 1 d at room temperature, all volatiles were removed *in vacuo*, the residue was redissolved in pentane and dried again *in vacuo* for 50 min. Single crystals of 2<sup>Cl</sup>-Dur (16.0 mg, 62%) suitable for X-ray diffraction analysis were obtained by vapour diffusion of pentane in a saturated benzene solution. <sup>1</sup>H{<sup>11</sup>B} NMR (500.1 MHz, C<sub>6</sub>D<sub>6</sub>, 297 K): δ = 7.18 (t, 1H, <sup>3</sup>J = 7.6 Hz, *p*-CH<sup>Dip</sup>, overlaps with the peak of the solvent), 7.12-7.07 (m, 2H, *m*-CH<sup>Dip</sup>), 6.83 (s, 1H, CH<sup>Dur</sup>), 3.00 (br, 2H, CH(CH<sub>3</sub>)<sub>2</sub><sup>Dip</sup>), 2.27-1.93 (m, 12H, CH<sub>3</sub><sup>Dur</sup>), 1.70 (s, 2H, CH<sub>2</sub><sup>CAAC</sup>), 1.38 (s, 6H, CH<sub>3</sub><sup>CAAC</sup>), 1.29-1.01 (m, 12H, CH(CH<sub>3</sub>)<sub>2</sub><sup>Dip</sup>), 0.98 (s, 6H, CH<sub>3</sub><sup>CAAC</sup>) ppm. <sup>13</sup>C{<sup>1</sup>H} NMR (125.8 MHz, C<sub>6</sub>D<sub>6</sub>, 297 K): δ = 161.3 (C=N<sup>CAAC</sup>), 148.8 (*o*-C<sub>q</sub><sup>Dip</sup>), 134.1 (C<sub>q</sub><sup>Dur</sup>), 132.8 (*i*-C<sub>q</sub><sup>Dur</sup>), 132.3 (*i*-C<sub>q</sub><sup>Dip</sup>), 131.0 (CH<sub>Aryl</sub><sup>Dur</sup>), 129.1 (*p*-CH<sub>Aryl</sub><sup>Dip</sup>), 124.9 (*m*-CH<sub>Aryl</sub><sup>Dip</sup>), 63.3 (C<sub>q</sub><sup>CAAC</sup>), 51.2 (CH<sub>2</sub><sup>CAAC</sup>), 43.0 (C<sub>q</sub><sup>CAAC</sup>), 29.4 (CH<sub>3</sub><sup>CAAC</sup>), 29.1 (CH(CH<sub>3</sub>)<sub>2</sub><sup>Dip</sup>), 28.9 (CH<sub>3</sub><sup>CAAC</sup>), 24.2 (CH(CH<sub>3</sub>)<sub>2</sub><sup>Dip</sup>), 19.9 (CH<sub>3</sub><sup>Dur</sup>) ppm. <sup>11</sup>B NMR (160.5 MHz, C<sub>6</sub>D<sub>6</sub>, 297 K): δ = 30.4 (s) ppm. Elemental analysis for [C<sub>30</sub>H<sub>44</sub>BClN<sub>2</sub>] (M<sub>w</sub> = 478.96 g mol<sup>-1</sup>): calcd. C 75.23, H 9.26,

N 5.85%, found C 75.14, H 9.25, N 5.75%. HRMS LIFDI for [C<sub>30</sub>H<sub>44</sub>BCIN<sub>2</sub>] (m/z): calcd. 478.3281, found 478.3276

### Synthesis of 2<sup>Br</sup>-Mes

To a solution of **1** (225 mg, 604 μmol) in 4 mL benzene MesBBr<sub>2</sub> (175 mg, 604 μmol) dissolved in 2 mL benzene was added dropwise. After heating at 60 °C for 1 d all volatiles were removed *in vacuo*, the residue was extracted with benzene (2 × 10 mL) and dried *in vacuo*. Colourless single crystals of **2<sup>Br</sup>-Mes** (231 mg, 75%) suitable for X-ray diffraction analysis were obtained by slow evaporation of a saturated benzene solution at room temperature. <sup>1</sup>H{<sup>11</sup>B} NMR (500.1 MHz, C<sub>6</sub>D<sub>6</sub>, 297 K): δ = 7.19-7.16 (m, 1H, *p*-CH<sup>Dip</sup>, overlaps with the peak of the solvent), 7.14-7.05 (m, 2H, *m*-CH<sup>Dip</sup>), 6.70 (s, 2H, CH<sub>Aryl</sub><sup>Mes</sup>), 2.98 (br, 2H, CH(CH<sub>3</sub>)<sub>2</sub><sup>Dip</sup>), 2.54-1.99 (m, 9 H, CH<sub>3</sub><sup>Mes</sup>), 1.67 (s, 2H, CH<sub>2</sub><sup>CAAC</sup>), 1.50-1.27 (m, 9 H, CH(CH<sub>3</sub>)<sub>2</sub><sup>Dip</sup> + CH<sub>3</sub><sup>CAAC</sup>), 1.32-1.01 (m, 9 H, CH(CH<sub>3</sub>)<sub>2</sub><sup>Dip</sup> + CH<sub>3</sub><sup>CAAC</sup>), 0.96 (br s, 6H, CH<sub>3</sub><sup>CAAC</sup>) ppm. <sup>13</sup>C{<sup>1</sup>H} NMR (125.8 MHz, C<sub>6</sub>D<sub>6</sub>, 297 K): δ = 162.0 (C=N<sup>CAAC</sup>), 149.1 (*o*-C<sub>q</sub><sup>Dip</sup>), 138.0 (*i*-C<sub>q</sub><sup>Mes</sup>), 136.7 (C<sub>q</sub><sup>Mes</sup>), 132.1 (*i*-C<sub>q</sub><sup>Dip</sup>), 129.2 (*p*-CH<sup>Dip</sup>), 127.5 (CH<sup>Mes</sup>), 125.0 (*m*-CH<sup>Dip</sup>), 63.7 (C<sub>q</sub><sup>CAAC</sup>), 51.5 (CH<sub>2</sub><sup>CAAC</sup>), 43.0 (C<sub>q</sub><sup>CAAC</sup>), 29.1 (CH(CH<sub>3</sub>)<sub>2</sub><sup>Dip</sup> + CH<sub>3</sub><sup>CAAC</sup>), 28.6 (CH<sub>3</sub><sup>CAAC</sup>), 24.1 (CH(CH<sub>3</sub>)<sub>2</sub><sup>Dip</sup>), 21.4 (CH<sub>3</sub><sup>Mes</sup>) ppm. <sup>11</sup>B NMR (160.5 MHz, C<sub>6</sub>D<sub>6</sub>, 297 K): δ = 26.2 (br s) ppm. Elemental analysis for [C<sub>29</sub>H<sub>42</sub>BBrN<sub>2</sub>] (M<sub>w</sub> = 509.38 g mol<sup>-1</sup>): calcd. C 68.38, H 8.31, N 5.50%; found C 68.31, H 8.14, N 5.18%. HRMS LIFDI for [C<sub>29</sub>H<sub>42</sub>BBrN<sub>2</sub>] (m/z): calcd. 509.2697; found 509.2695.

### Synthesis of 2<sup>Br</sup>-Ph

**1** (100 mg, 270 μmol) and PhBBr<sub>2</sub> (66.5 mg, 270 μmol) were combined in benzene (2 mL) and was stirred at room temperature overnight. All volatiles were removed *in vacuo*. Colourless single crystals of **2<sup>Br</sup>-Ph** (101 mg, 81%) were obtained by vapour diffusion of pentane in a saturated benzene solution. <sup>1</sup>H{<sup>11</sup>B} NMR (500.1 MHz, C<sub>6</sub>D<sub>6</sub>, 297 K): δ = 8.12-8.05 (m, 2H, CH<sup>Ph</sup>), 7.27-7.17 (m, 3H, CH<sup>Ph</sup>, overlaps with the peak of the solvent), 7.10 (dd, 1H, <sup>3</sup>J = 7.8 Hz, *p*-CH<sup>Dip</sup>), 7.03-6.99 (m, 2H, *m*-CH<sup>Dip</sup>), 3.11 (sept, 2H, CH(CH<sub>3</sub>)<sub>2</sub><sup>Dip</sup>), 1.68 (s, 2H, CH<sub>2</sub><sup>CAAC</sup>), 1.31 (d, 6H, <sup>3</sup>J = 6.5 Hz, CH(CH<sub>3</sub>)<sub>2</sub><sup>Dip</sup>), 1.26 (s, 6H, CH<sub>3</sub><sup>CAAC</sup>), 1.22 (d, 6H, <sup>3</sup>J = 7.0 Hz, CH(CH<sub>3</sub>)<sub>2</sub><sup>Dip</sup>), 0.96 (s, 6H, CH<sub>3</sub><sup>CAAC</sup>) ppm. <sup>13</sup>C{<sup>1</sup>H} NMR (125.8 MHz, C<sub>6</sub>D<sub>6</sub>, 297 K): δ = 162.2 (C=N<sup>CAAC</sup>), 149.1 (*o*-C<sub>q</sub><sup>Dip</sup>), 136.3 (*o*-CH<sub>Aryl</sub><sup>Ph</sup>), 131.0 (*i*-C<sub>q</sub><sup>Dip</sup>), 130.6 (*p*-CH<sup>Ph</sup>), 129.2 (*p*-CH<sup>Dip</sup>), 127.5 (*m*-CH<sup>Ph</sup>), 124.6 (*m*-CH<sup>Dip</sup>), 63.5 (C<sub>q</sub><sup>CAAC</sup>), 50.8 (CH<sub>2</sub><sup>CAAC</sup>), 44.0 (C<sub>q</sub><sup>CAAC</sup>), 29.5 (CH<sub>3</sub><sup>CAAC</sup>), 29.3 (CH(CH<sub>3</sub>)<sub>2</sub><sup>Dip</sup>), 28.6 (CH<sub>3</sub><sup>CAAC</sup>), 27.8 (CH(CH<sub>3</sub>)<sub>2</sub><sup>Dip</sup>), 23.6 (CH(CH<sub>3</sub>)<sub>2</sub><sup>Dip</sup>) ppm. <sup>11</sup>B NMR (160.5 MHz, C<sub>6</sub>D<sub>6</sub>, 297 K): δ = 29.8 (s) ppm. Elemental analysis for

[C<sub>26</sub>H<sub>36</sub>BBrN<sub>2</sub>] ( $M_w = 467.30 \text{ g mol}^{-1}$ ): calcd. C 66.89, H 7.77, N 5.99%; found C 66.72, H 8.03, N 5.93%. HRMS LIFDI for [C<sub>26</sub>H<sub>36</sub>BBrN<sub>2</sub>] (m/z): calcd. 467.2228, found 467.2224.

### Synthesis of 3-NMe<sub>2</sub>

**1** (143 mg, 390  $\mu\text{mol}$ ) and **2**<sup>Cl</sup>-NMe<sub>2</sub> (150 mg, 390  $\mu\text{mol}$ ) were combined in benzene (4 mL) and the reaction mixture was heated to 80 °C for 2 d. After removal of all volatiles *in vacuo*, the product was recrystallised from benzene (1.5 mL) leading to the formation of a large crop of colourless crystals, which were washed with benzene (3  $\times$  0.5 mL) and dried *in vacuo* affording **3**-NMe<sub>2</sub> (164 mg, 65%). Single crystals suitable for X-ray diffraction analysis were obtained by slow evaporation of a saturated benzene solution at room temperature. <sup>1</sup>H{<sup>11</sup>B} NMR (500.1 MHz, C<sub>6</sub>D<sub>6</sub>, 297 K):  $\delta = 7.23$  (t, 2H, <sup>3</sup>J = 7.3 Hz, *p*-CH<sup>Dip</sup>), 7.20-7.17 (m, 4H, *m*-CH<sup>Dip</sup>, overlaps with the solvent peak), 3.27 (sept, 4H, <sup>3</sup>J = 6.8 Hz, CH(CH<sub>3</sub>)<sub>2</sub><sup>Dip</sup>), 2.73 (s, 6H, N(CH<sub>3</sub>)<sub>2</sub>), 1.72 (s, 4H, CH<sub>2</sub><sup>CAAC</sup>), 1.36 (d, 12H, <sup>3</sup>J = 6.7 Hz, CH(CH<sub>3</sub>)<sub>2</sub><sup>Dip</sup>), 1.30 (d, 12H, <sup>3</sup>J = 6.7 Hz, CH(CH<sub>3</sub>)<sub>2</sub><sup>Dip</sup>), 1.19 (br s, 12H, CH<sub>3</sub><sup>CAAC</sup>), 1.04 (s, 12H, CH<sub>3</sub><sup>CAAC</sup>) ppm. <sup>13</sup>C{<sup>1</sup>H} NMR (125.8 MHz, C<sub>6</sub>D<sub>6</sub>, 297 K):  $\delta = 160.9$  (C=N<sup>CAAC</sup>), 150.2 (*o*-C<sub>q</sub><sup>Dip</sup>), 134.6 (*i*-C<sub>q</sub><sup>Dip</sup>), 127.8 (*p*-CH<sup>Dip</sup>, detected by HSQC, overlaps with the solvent peak), 124.1 (*m*-CH<sup>Dip</sup>), 59.7 (C<sub>q</sub><sup>CAAC</sup>), 53.6 (CH<sub>2</sub><sup>CAAC</sup>), 41.8 (C<sub>q</sub><sup>CAAC</sup>), 40.0 (N(CH<sub>3</sub>)<sub>2</sub>), 30.2 (CH<sub>3</sub><sup>CAAC</sup>), 29.0 (CH(CH<sub>3</sub>)<sub>2</sub><sup>Dip</sup>), 28.3 (CH(CH<sub>3</sub>)<sub>2</sub><sup>Dip</sup>), 24.0 (CH<sub>3</sub><sup>CAAC</sup>) ppm. Note: the <sup>13</sup>C resonance for one CH<sub>3</sub><sup>CAAC</sup> could not be detected, presumably due to broadening. <sup>11</sup>B NMR (160.5 MHz, C<sub>6</sub>D<sub>6</sub>, 297 K):  $\delta = 27.3$  (s) ppm. Elemental analysis for [C<sub>42</sub>H<sub>68</sub>BN<sub>5</sub>] ( $M_w = 653.85 \text{ g mol}^{-1}$ ): calcd. C 77.15, H 10.48, N 10.71%, found C 76.89, H 10.70, N 10.42% HRMS LIFDI for [C<sub>42</sub>H<sub>68</sub>BN<sub>5</sub>] (m/z): calcd. 653.5562, found 653.5554.

### Synthesis of 3-Ph

A solution of PhBBr<sub>2</sub> (59.0 mg, 240  $\mu\text{mol}$ ) in 1 mL benzene was treated with **1** (177 mg, 480  $\mu\text{mol}$ ) dissolved in 1 mL benzene. After stirring for 1 d at room temperature, the reaction mixture turned orange. All volatiles were removed *in vacuo*. Colourless single crystals of **3-Ph** (105 mg, 64%) were obtained by slow evaporation of a saturated benzene solution at room temperature. <sup>1</sup>H{<sup>11</sup>B} NMR (500.1 MHz, C<sub>6</sub>D<sub>6</sub>, 297 K):  $\delta = 7.92$  (d, 2H, <sup>3</sup>J = 7.2 Hz, *o*-CH<sup>Ph</sup>), 7.25 (t, 2H, <sup>3</sup>J = 7.4 Hz, *m*-CH<sup>Ph</sup>), 7.28 (t, 1H, <sup>3</sup>J = 7.4 Hz, *p*-CH<sub>Aryl</sub><sup>Ph</sup>), 7.22 (t, 2H, <sup>3</sup>J = 7.6 Hz, *p*-CH<sup>Dip</sup>), 7.19-7.14 (m, 4H, *m*-CH<sup>Dip</sup>, overlaps with the solvent peak), 3.37 (br s, 4H, CH(CH<sub>3</sub>)<sub>2</sub><sup>Dip</sup>), 1.72 (s, 4H, CH<sub>2</sub><sup>CAAC</sup>), 1.46-1.35 (m, 12H, CH(CH<sub>3</sub>)<sub>2</sub><sup>Dip</sup>), 1.33 (d, 12H, <sup>3</sup>J = 6.7 Hz), 1.12-1.01 (m, 24H, CH<sub>3</sub><sup>CAAC</sup>) ppm. <sup>13</sup>C{<sup>1</sup>H} NMR (125.8 MHz, C<sub>6</sub>D<sub>6</sub>, 297 K):  $\delta = 159.7$  (C=N<sup>CAAC</sup>), 150.3 (*o*-C<sub>q</sub><sup>Dip</sup>), 141.7 (C<sub>q</sub><sup>Ph</sup>), 135.9 (*o*-CH<sup>Ph</sup>), 134.3 (*i*-C<sub>q</sub><sup>Dip</sup>), 128.7 (*p*-CH<sup>Ph</sup>),

128.1 (*p*-CH<sup>Dip</sup>), 126.6 (*m*-CH<sup>Ph</sup>), 124.4 (*m*-CH<sup>Dip</sup>), 60.4 (C<sub>q</sub><sup>CAAC</sup>), 52.9 (CH<sub>2</sub><sup>CAAC</sup>), 43.0 (C<sub>q</sub><sup>CAAC</sup>), 30.1 (CH<sub>3</sub><sup>CAAC</sup>), 29.1 (CH(CH<sub>3</sub>)<sub>2</sub><sup>Dip</sup>), 28.3 (CH(CH<sub>3</sub>)<sub>2</sub><sup>Dip</sup>), 24.0 (CH(CH<sub>3</sub>)<sub>2</sub><sup>Dip</sup>) ppm. <sup>11</sup>B NMR (160.5 MHz, C<sub>6</sub>D<sub>6</sub>, 297 K):  $\delta$  = 29.7 (br s) ppm. Elemental analysis for [C<sub>46</sub>H<sub>67</sub>BN<sub>4</sub>] (*M<sub>w</sub>* = 686.88 g mol<sup>-1</sup>): calcd. C 80.44, H 9.83, N 8.16%; found C 81.12, H 9.79, N 7.72%. HRMS LIFDI for [C<sub>46</sub>H<sub>67</sub>BN<sub>4</sub>] (*m/z*): calcd. 686.5453; found 686.5445.

### Synthesis of 3-Cl

**1** (200 mg, 537  $\mu$ mol) and BCl<sub>3</sub>·SMe<sub>2</sub> (48.0 mg, 268  $\mu$ mol) were combined in benzene (4 mL) and the reaction mixture was heated at 60 °C for 2 d. After filtration, all volatiles were removed *in vacuo*. The product was collected by recrystallisation from hexane (2 mL), yielding **3-Cl** (105 mg, 61%) as a colourless solid. Colourless crystals of **3-Cl** suitable for X-ray diffraction analysis were obtained by slow evaporation of a saturated toluene solution at room temperature. <sup>1</sup>H{<sup>11</sup>B} NMR (500.1 MHz, C<sub>6</sub>D<sub>6</sub>, 297 K):  $\delta$  = 7.21 (t, 2H, <sup>3</sup>*J* = 6.5 Hz, *p*-CH<sup>Dip</sup>), 7.16-7.13 (m, 4H, *m*-CH<sup>Dip</sup>), 3.17 (sept, 4H, <sup>3</sup>*J* = 6.7 Hz, CH(CH<sub>3</sub>)<sub>2</sub><sup>Dip</sup>), 1.67 (s, 4H, CH<sub>2</sub><sup>CAAC</sup>), 1.43 (d, 12H, <sup>3</sup>*J* = 6.8 Hz, CH(CH<sub>3</sub>)<sub>2</sub><sup>Dip</sup>), 1.27 (d, 12H, <sup>3</sup>*J* = 6.8 Hz, CH(CH<sub>3</sub>)<sub>2</sub><sup>Dip</sup>), 1.20 (br s, 12H, CH<sub>3</sub><sup>CAAC</sup>), 0.99 (s, 12H, CH<sub>3</sub><sup>CAAC</sup>) ppm. <sup>13</sup>C{<sup>1</sup>H} NMR (125.8 MHz, C<sub>6</sub>D<sub>6</sub>, 297 K):  $\delta$  = 162.1 (C=N<sup>CAAC</sup>), 149.7 (*o*-C<sub>q</sub><sup>Dip</sup>), 133.3 (*i*-C<sub>q</sub><sup>Dip</sup>), 128.0 (*p*-CH<sup>Dip</sup>), 124.1 (*m*-CH<sup>Dip</sup>), 61.0 (C<sub>q</sub><sup>CAAC</sup>), 52.5 (CH<sub>2</sub><sup>CAAC</sup>), 43.3 (C<sub>q</sub><sup>CAAC</sup>), 29.6 (CH<sub>3</sub><sup>CAAC</sup>), 29.2 (CH(CH<sub>3</sub>)<sub>2</sub><sup>Dip</sup>), 29.1 (CH<sub>3</sub><sup>CAAC</sup>), 27.2 (CH(CH<sub>3</sub>)<sub>2</sub><sup>Dip</sup>), 23.5 (CH(CH<sub>3</sub>)<sub>2</sub><sup>Dip</sup>) ppm. <sup>11</sup>B NMR (160.5 MHz, C<sub>6</sub>D<sub>6</sub>, 297 K):  $\delta$  = 23.9 (s) ppm. Elemental analysis for [C<sub>40</sub>H<sub>62</sub>BClN<sub>4</sub>] (*M<sub>w</sub>* = 645.22 g mol<sup>-1</sup>): calcd. C 76.38, H 9.48, N 7.75%, found C 75.37, H 9.69, N 7.82%. HRMS LIFDI for [C<sub>40</sub>H<sub>62</sub>BClN<sub>4</sub>] (*m/z*): calcd. 644.4751, found 644.4743.

### Synthesis of 3-Br

**1** (1.00 g, 2.68 mmol) was dissolved in benzene (3 mL) and BBr<sub>3</sub>(SMe<sub>2</sub>) (420 mg, 1.34 mmol) in benzene (3 mL) was added, and the reaction mixture was heated to 60 °C overnight, whereupon the colour changed from colourless to pink. All volatiles were removed *in vacuo*, and the reaction mixture was filtrated and extracted with benzene (4  $\times$  5 mL) and dried again *in vacuo* to afford **3-Br** as a colourless solid (800 mg, 86%). Colourless crystals were obtained by slow evaporation of a saturated benzene solution at room temperature. <sup>1</sup>H{<sup>11</sup>B} NMR (500.1 MHz, C<sub>6</sub>D<sub>6</sub>, 297 K):  $\delta$  = 7.23-7.18 (m, 2H, *p*-CH<sup>Dip</sup>), 7.16-7.13 (m, 4H, *m*-CH<sup>Dip</sup>, overlaps with the solvent peak), 3.14 (sept, 4H, <sup>3</sup>*J* = 6.8 Hz, CH(CH<sub>3</sub>)<sub>2</sub><sup>Dip</sup>), 1.65 (s, 4H, CH<sub>2</sub><sup>CAAC</sup>), 1.44 (d, 12H, <sup>3</sup>*J* = 6.8 Hz, CH(CH<sub>3</sub>)<sub>2</sub><sup>Dip</sup>), 1.26 (d, 12H, <sup>3</sup>*J* = 6.8 Hz, CH(CH<sub>3</sub>)<sub>2</sub><sup>Dip</sup>), 1.22 (br s, 12H, CH<sub>3</sub><sup>CAAC</sup>), 0.98 (s, 12H, CH<sub>3</sub><sup>CAAC</sup>) ppm. <sup>13</sup>C{<sup>1</sup>H} NMR (125.8 MHz, C<sub>6</sub>D<sub>6</sub>, 297 K):  $\delta$  = 162.1

(C=N<sup>CAAC</sup>), 149.6 (*o*-C<sub>q</sub><sup>Dip</sup>), 133.1 (*i*-C<sub>q</sub><sup>Dip</sup>), 128.5 (*p*-CH<sup>Dip</sup>), 124.2 (*m*-CH<sup>Dip</sup>), 61.3 (C<sub>q</sub><sup>CAAC</sup>), 52.4 (CH<sub>2</sub><sup>CAAC</sup>), 43.4 (C<sub>q</sub><sup>CAAC</sup>), 29.6 (CH<sub>3</sub><sup>CAAC</sup>), 29.2 (CH(CH<sub>3</sub>)<sub>2</sub><sup>Dip</sup>), 29.0 (CH<sub>3</sub><sup>CAAC</sup>), 27.9 (CH(CH<sub>3</sub>)<sub>2</sub><sup>Dip</sup>), 23.5 (CH(CH<sub>3</sub>)<sub>2</sub><sup>Dip</sup>) ppm. <sup>11</sup>B NMR (160.5 MHz, C<sub>6</sub>D<sub>6</sub>, 297 K):  $\delta$  = 21.0 (s) ppm. Elemental analysis for [C<sub>40</sub>H<sub>62</sub>BBrN<sub>4</sub>] (*M<sub>w</sub>* = 689.68 g mol<sup>-1</sup>): calcd. C 69.66, H 9.06, N 8.12%, found C 69.40, H 9.27, N 8.05%. HRMS LIFDI for [C<sub>40</sub>H<sub>62</sub>BBrN<sub>4</sub>] (*m/z*): calcd. 689.4324, found 689.4310.

### Synthesis of 3-N<sub>3</sub>

**3-Br** (200 mg, 290  $\mu$ mol) was dissolved in dichloromethane (3.5 mL) and TMSN<sub>3</sub> (50.0 mg, 435  $\mu$ mol) was added. After 1 d at room temperature, all volatiles were removed *in vacuo*. Colourless crystals of **3-N<sub>3</sub>** (153 mg, 81%) suitable for X-ray diffraction analysis were obtained by slow evaporation of a saturated benzene solution at room temperature. <sup>1</sup>H{<sup>11</sup>B} NMR (500.1 MHz, C<sub>6</sub>D<sub>6</sub>, 297 K):  $\delta$  = 7.20 (t, 2H, <sup>3</sup>*J* = 6.4 Hz, *p*-CH<sup>Dip</sup>), 7.16-7.13 (m, 4H, *m*-CH<sup>Dip</sup>), 3.18 (sept, 4H, <sup>3</sup>*J* = 6.8 Hz, CH(CH<sub>3</sub>)<sub>2</sub><sup>Dip</sup>), 1.66 (s, 4H, CH<sub>2</sub><sup>CAAC</sup>), 1.40 (d, 12H, <sup>3</sup>*J* = 6.6 Hz, CH(CH<sub>3</sub>)<sub>2</sub><sup>Dip</sup>), 1.27 (d, 12H, <sup>3</sup>*J* = 6.8 Hz, CH(CH<sub>3</sub>)<sub>2</sub><sup>Dip</sup>), 1.14 (s, 12H, CH<sub>3</sub><sup>CAAC</sup>), 0.99 (s, 12H, CH<sub>3</sub><sup>CAAC</sup>) ppm. <sup>13</sup>C{<sup>1</sup>H} NMR (125.8 MHz, C<sub>6</sub>D<sub>6</sub>, 297 K):  $\delta$  = 163.1 (C=N<sup>CAAC</sup>), 149.8 (*o*-C<sub>q</sub><sup>Dip</sup>), 133.5 (*i*-C<sub>q</sub><sup>Dip</sup>), 128.3 (*p*-CH<sup>Dip</sup>), 124.1 (*m*-CH<sup>Dip</sup>), 60.7 (C<sub>q</sub><sup>CAAC</sup>), 52.4 (CH<sub>2</sub><sup>CAAC</sup>), 42.3 (C<sub>q</sub><sup>CAAC</sup>), 29.6 (CH<sub>3</sub><sup>CAAC</sup>), 29.2 (CH(CH<sub>3</sub>)<sub>2</sub><sup>Dip</sup>), 29.0 (CH<sub>3</sub><sup>CAAC</sup>), 27.6 (CH(CH<sub>3</sub>)<sub>2</sub><sup>Dip</sup>), 23.5 (CH(CH<sub>3</sub>)<sub>2</sub><sup>Dip</sup>) ppm. <sup>11</sup>B NMR (160.5 MHz, C<sub>6</sub>D<sub>6</sub>, 297 K):  $\delta$  = 24.3 ppm. FT-IR (solid-state):  $\tilde{\nu}$  = 2139, 2109, 2036, 2027 (N=N=N), 1670, 1614, 1591, 1577 (N=C<sub>CAAI</sub>) cm<sup>-1</sup>. Elemental analysis for [C<sub>40</sub>H<sub>62</sub>BN<sub>7</sub>] (*M<sub>w</sub>* = 651.80 g/mol): calcd. C 73.71, H 9.59, N 15.04%, found C 73.69, H 9.81, N 15.04%. HRMS LIFDI for [C<sub>40</sub>H<sub>62</sub>BN<sub>7</sub>] (*m/z*): calcd. 651.5154, found 651.5140.

### Synthesis of 3-NCS

To a solution of **3-Br** (20.0 mg, 30.0  $\mu$ mol) dissolved in benzene (0.6 mL) TMSNCS (4.00 mg, 30.0  $\mu$ mol) was added. After 1 d at room temperature, all volatiles were removed *in vacuo*. Single crystals suitable for X-ray diffraction analysis were obtained by slow evaporation of a saturated benzene solution, yielding **3-NCS** (18 mg, 93%). <sup>1</sup>H{<sup>11</sup>B} NMR (500.1 MHz, C<sub>6</sub>D<sub>6</sub>, 297 K):  $\delta$  = 7.18 (t, 2H, <sup>3</sup>*J* = 6.7 Hz, *p*-CH<sup>Dip</sup>, overlaps with the solvent peak), 7.13-7.10 (m, 4H, *m*-CH<sup>Dip</sup>), 3.09 (sept, 4H, <sup>3</sup>*J* = 6.8 Hz, CH(CH<sub>3</sub>)<sub>2</sub><sup>Dip</sup>), 1.61 (s, 4H, CH<sub>2</sub><sup>CAAC</sup>), 1.39 (d, 12H, <sup>3</sup>*J* = 6.7 Hz, CH(CH<sub>3</sub>)<sub>2</sub><sup>Dip</sup>), 1.24 (d, 12H, <sup>3</sup>*J* = 6.8 Hz, CH(CH<sub>3</sub>)<sub>2</sub><sup>Dip</sup>), 1.07 (s, 12H, CH<sub>3</sub><sup>CAAC</sup>), 0.95 (s, 12H, CH<sub>3</sub><sup>CAAC</sup>) ppm. <sup>13</sup>C{<sup>1</sup>H} NMR (125.8 MHz, C<sub>6</sub>D<sub>6</sub>, 297 K):  $\delta$  = 163.7 (C=N<sup>CAAC</sup>), 149.5 (*o*-C<sub>q</sub><sup>Dip</sup>), 133.1 (*i*-C<sub>q</sub><sup>Dip</sup>), 128.5 (*p*-CH<sup>Dip</sup>), 124.1 (*m*-CH<sup>Dip</sup>), 61.2 (C<sub>q</sub><sup>CAAC</sup>),



52.1 ( $\text{CH}_2^{\text{CAAC}}$ ), 42.8 ( $\text{C}_q^{\text{CAAC}}$ ), 29.5 ( $\text{CH}_3^{\text{CAAC}}$ ), 29.2 ( $\text{CH}(\text{CH}_3)_2^{\text{Dip}}$ ), 28.8 ( $\text{CH}_3^{\text{CAAC}}$ ), 27.0 ( $\text{CH}(\text{CH}_3)_2^{\text{Dip}}$ ), 23.3 ( $\text{CH}(\text{CH}_3)_2^{\text{Dip}}$ ) ppm.  $^{11}\text{B}$  NMR (160.5 MHz,  $\text{C}_6\text{D}_6$ , 297 K):  $\delta = 17.5$  (s) ppm. FT-IR (solid-state):  $\tilde{\nu} = 2105$  (br,  $\text{N}=\text{C}_{\text{NCS}}$ ), 1744, 1688 ( $\text{N}=\text{C}_{\text{CAAI}}$ )  $\text{cm}^{-1}$ . Elemental analysis for  $[\text{C}_{41}\text{H}_{62}\text{BN}_5\text{S}]$  ( $M_w = 667.85 \text{ g mol}^{-1}$ ): calcd. C 73.74, H 9.36, N 10.49, S 4.80%; found C 72.28, H 9.27, N 10.10, S 4.35%. HRMS LIFDI for  $[\text{C}_{41}\text{H}_{62}\text{BN}_5\text{S}]$  (m/z): calcd. 667.4813, found 667.4802.

### Synthesis of 4

To a solution of **1** (159 mg, 430  $\mu\text{mol}$ ) dissolved in benzene (1.5 mL)  $\text{B}_2\text{Cl}_2(\text{NMe}_2)_2$  (100 mg, 550  $\mu\text{mol}$ ) dissolved in benzene (1 mL) was added dropwise and stirred at room temperature overnight. All volatiles were removed *in vacuo* and the product was washed with hexane ( $4 \times 4 \text{ mL}$ ). The product was dried again *in vacuo*, yielding **4** (146 mg, 77%) as a colourless solid. Single crystals suitable for X-ray diffraction analysis were obtained by slow evaporation of a saturated hexane solution at room temperature.  $^1\text{H}\{^{11}\text{B}\}$  NMR (500.1 MHz,  $\text{C}_6\text{D}_6$ , 297 K):  $\delta = 7.18$  (t, 1H,  $^3J = 6.6 \text{ Hz}$ ,  $p\text{-CH}^{\text{Dip}}$ ), 7.12 (m, 2H,  $m\text{-CH}^{\text{Dip}}$ ), 3.22 (sept, 2H,  $^3J = 6.6 \text{ Hz}$ ,  $\text{CH}(\text{CH}_3)_2^{\text{Dip}}$ ), 2.75 (s, 3H,  $\text{N}(\text{CH}_3)_2$ ), 2.66 (s, 3H,  $\text{N}(\text{CH}_3)_2$ ), 2.59 (s, 3H,  $\text{N}(\text{CH}_3)_2$ ), 2.35 (s, 3H,  $\text{N}(\text{CH}_3)_2$ ), 1.78 (s, 2H,  $\text{CH}_2^{\text{CAAC}}$ ), 1.38 (br s, 6H,  $\text{CH}_3^{\text{CAAC}}$ ), 1.27 (d, 6H,  $^3J = 6.9 \text{ Hz}$ ,  $\text{CH}(\text{CH}_3)_2^{\text{Dip}}$ ), 1.18 (br s, 6H,  $\text{CH}(\text{CH}_3)_2^{\text{Dip}}$ ), 1.06 (s, 6H,  $\text{CH}_3^{\text{CAAC}}$ ) ppm.  $^{13}\text{C}\{^1\text{H}\}$  NMR (125.8 MHz,  $\text{C}_6\text{D}_6$ , 297 K):  $\delta = 157.3$  ( $\text{C}=\text{N}^{\text{CAAC}}$ ), 150.2 ( $o\text{-C}_q^{\text{Dip}}$ ), 134.1 ( $i\text{-C}_q^{\text{Dip}}$ ), 128.1 ( $p\text{-CH}^{\text{Dip}}$ ), 123.8 ( $m\text{-CH}^{\text{Dip}}$ ), 59.8 ( $\text{C}_q^{\text{CAAC}}$ ), 52.3 ( $\text{CH}_2^{\text{CAAC}}$ ), 41.8 ( $\text{N}(\text{CH}_3)_2$ ), 41.2 ( $\text{N}(\text{CH}_3)_2$ ), 40.7 ( $\text{C}_q^{\text{CAAC}}$ ), 37.9 ( $\text{N}(\text{CH}_3)_2$ ), 37.4 ( $\text{N}(\text{CH}_3)_2$ ), 29.0 ( $\text{CH}(\text{CH}_3)_2^{\text{Dip}}$ ), 29.0 ( $\text{CH}_3^{\text{CAAC}}$ ), 26.3 ( $\text{CH}(\text{CH}_3)_2^{\text{Dip}}$ ), 23.5 ( $\text{CH}_3^{\text{CAAC}}$ ) ppm.  $^{11}\text{B}$  NMR (160.5 MHz,  $\text{C}_6\text{D}_6$ , 297 K):  $\delta = 40.8$ , 30.0 ppm. Elemental analysis for  $[\text{C}_{24}\text{H}_{43}\text{B}_2\text{ClN}_4]$  ( $M_w = 444.71 \text{ g mol}^{-1}$ ): calcd. C 64.82, H 9.75, N 12.60%, found C 64.74, H 9.92, N 12.47%. HRMS LIFDI for  $[\text{C}_{22}\text{H}_{37}\text{BBrN}_3]$  (m/z): calcd. 444.3355, found 444.3357.

### Synthesis of 5-NMe<sub>2</sub>

**1** (100 mg, 270  $\mu\text{mol}$ ) and  $\text{B}_2\text{Br}_2(\text{NMe}_2)_2$  (36 mg, 130  $\mu\text{mol}$ ) were combined in benzene (2.5 mL) and stirred at room temperature for 3 days. All volatiles were removed *in vacuo* and **5-NMe<sub>2</sub>** was recrystallised from benzene (2 mL) leading to the formation colourless single crystals (58 mg, 61%), which were suitable for X-ray diffraction analysis.  $^1\text{H}\{^{11}\text{B}\}$  NMR (500.1 MHz,  $\text{C}_6\text{D}_6$ , 297 K):  $\delta = 7.19\text{-}7.12$  (m, 6H,  $p\text{-CH}^{\text{Dip}} + m\text{-CH}^{\text{Dip}}$ ), 3.28 (sept, 4H,  $^3J = 6.8 \text{ Hz}$ ,  $\text{CH}(\text{CH}_3)_2^{\text{Dip}}$ ), 2.47 (s, 6H,  $\text{N}(\text{CH}_3)_2$ ), 2.16 (s, 6H,  $\text{N}(\text{CH}_3)_2$ ), 1.88 (br s, 4H,  $\text{CH}_2^{\text{CAAC}}$ ), 1.30-1.28 (m, 36H,  $\text{CH}(\text{CH}_3)_2^{\text{Dip}} + \text{CH}_3^{\text{CAAC}}$ ), 1.20-1.01 (m, 12H,  $\text{CH}_3^{\text{CAAC}}$ ) ppm.  $^{13}\text{C}\{^1\text{H}\}$  NMR (125.8

MHz, C<sub>6</sub>D<sub>6</sub>, 297 K):  $\delta$  = 153.4 (C=N<sup>CAAC</sup>), 150.6 (*o*-C<sub>q</sub><sup>Dip</sup>), 149.8 (*o*-C<sub>q</sub><sup>Dip</sup>), 135.0 (*i*-C<sub>q</sub><sup>Dip</sup>), 127.9 (*p*-CH<sup>Dip</sup>), 124.1 (*m*-CH<sup>Dip</sup>), 59.0 (C<sub>q</sub><sup>CAAC</sup>), 52.8 (CH<sub>2</sub><sup>CAAC</sup>), 40.5 (N(CH<sub>3</sub>)<sub>2</sub>), 39.8 (C<sub>q</sub><sup>CAAC</sup>), 38.4 (N(CH<sub>3</sub>)<sub>2</sub>), 31.8 (CH<sub>3</sub><sup>CAAC</sup>), 31.1 (CH<sub>3</sub><sup>CAAC</sup>), 29.1 (CH(CH<sub>3</sub>)<sub>2</sub><sup>Dip</sup>), 28.3 (CH<sub>3</sub><sup>CAAC</sup>), 26.3 (CH(CH<sub>3</sub>)<sub>2</sub><sup>Dip</sup>), 24.8 (CH(CH<sub>3</sub>)<sub>2</sub><sup>Dip</sup>), 23.3 (CH(CH<sub>3</sub>)<sub>2</sub><sup>Dip</sup>) ppm. <sup>11</sup>B NMR (160.5 MHz, C<sub>6</sub>D<sub>6</sub>, 297 K):  $\delta$  = 30.8 (br s) ppm. Elemental analysis for [C<sub>24</sub>H<sub>43</sub>B<sub>2</sub>ClN<sub>4</sub>] (*M<sub>w</sub>* = 708.74 g mol<sup>-1</sup>): calcd. C 74.57, H 10.52, N 11.86%, found C 74.91, H 10.78, N 11.92%. HRMS LIFDI for [C<sub>24</sub>H<sub>43</sub>B<sub>2</sub>ClN<sub>4</sub>] (*m/z*): calcd. 708.6144, found 708.6156.

### Synthesis of 5-Mes

**1** (20 mg, 54  $\mu$ mol) and B<sub>2</sub>Mes<sub>2</sub>Cl<sub>2</sub> (9.0 mg, 27  $\mu$ mol) were dissolved in benzene and the reaction mixture was heated to 80 °C for 3 days. All volatiles were removed *in vacuo* and small amount of yellow single crystals of **5-Mes** suitable for X-ray diffraction analysis could be obtained by slow evaporation of a saturated benzene solution (5.0 mg, 21%). <sup>1</sup>H{<sup>11</sup>B} NMR (500.1 MHz, C<sub>6</sub>D<sub>6</sub>, 297 K):  $\delta$  = 7.08 (t, 2H, <sup>3</sup>*J* = 7.8 Hz, *p*-CH<sup>Dip</sup>), 6.98-6.94 (m, 2H, *m*-CH<sup>Dip</sup>), 6.94-6.89 (m, 2H, *m*-CH<sup>Dip</sup>), 6.78 (s, 2H, *m*-CH<sup>Mes</sup>), 6.53 (s, 2H, *m*-CH<sup>Mes</sup>), 3.34 (sept, 2H, <sup>3</sup>*J* = 6.9 Hz, CH(CH<sub>3</sub>)<sub>2</sub><sup>Dip</sup>), 2.76 (sept, 2H, <sup>3</sup>*J* = 6.9 Hz, CH(CH<sub>3</sub>)<sub>2</sub><sup>Dip</sup>), 2.70 (s, 6H, CH<sub>3</sub><sup>Mes</sup>), 2.26 (s, 6H, CH<sub>3</sub><sup>Mes</sup>), 1.88 (d, 2H, <sup>2</sup>*J* = 12.7 Hz, CH<sub>2</sub><sup>CAAC</sup>), 1.76 (d, 2H, <sup>2</sup>*J* = 12.6 Hz, CH<sub>2</sub><sup>CAAC</sup>), 1.72 (s, 6H, CH<sub>3</sub><sup>CAAC</sup>), 1.46 (s, 6H, CH<sub>3</sub><sup>CAAC</sup>), 1.44 (s, 6H, CH<sub>3</sub><sup>CAAC</sup>), 1.27 (s, 6H, CH<sub>3</sub><sup>Mes</sup>), 1.17 (d, 6H, <sup>3</sup>*J* = 6.7 Hz, CH(CH<sub>3</sub>)<sub>2</sub><sup>Dip</sup>), 0.93 (d, 6H, <sup>3</sup>*J* = 6.9 Hz, CH(CH<sub>3</sub>)<sub>2</sub><sup>Dip</sup>), 0.75 (s, 6H, CH<sub>3</sub><sup>CAAC</sup>), 0.72 (d, 6H, <sup>3</sup>*J* = 6.7 Hz, CH(CH<sub>3</sub>)<sub>2</sub><sup>Dip</sup>), 0.38 (d, 6H, <sup>3</sup>*J* = 6.9 Hz, CH(CH<sub>3</sub>)<sub>2</sub><sup>Dip</sup>) ppm. <sup>13</sup>C{<sup>1</sup>H} NMR (125.8 MHz, C<sub>6</sub>D<sub>6</sub>, 297 K):  $\delta$  = 152.8 (C=N<sup>CAAC</sup>), 150.7 2 (*o*-C<sub>q</sub><sup>Dip</sup>), 149.2 2 (*o*-C<sub>q</sub><sup>Dip</sup>), 144.4 (C<sub>q</sub><sup>Mes</sup>), 139.0 (C<sub>q</sub><sup>Mes</sup>), 136.8 (C<sub>q</sub><sup>Mes</sup>), 136.3 (*i*-C<sub>q</sub><sup>Dip</sup>), 133.6 (*i*-C<sub>q</sub><sup>Mes</sup>), 127.2 (CH<sup>Mes</sup>) 125.3 (*p*-CH<sup>Dip</sup>), 124.8 (*m*-CH<sup>Dip</sup>), 124.4 (*m*-CH<sup>Dip</sup>), 60.8 (C<sub>q</sub><sup>CAAC</sup>), 53.0 (CH<sub>2</sub><sup>CAAC</sup>), 42.1 (C<sub>q</sub><sup>CAAC</sup>), 32.5 (CH<sub>3</sub><sup>CAAC</sup>), 30.5 (CH<sub>3</sub><sup>CAAC</sup>), 29.1 (CH<sub>3</sub><sup>CAAC</sup>), 29.0 (CH(CH<sub>3</sub>)<sub>2</sub><sup>Dip</sup>), 28.6 (CH(CH<sub>3</sub>)<sub>2</sub><sup>Dip</sup>), 26.9 (CH<sub>3</sub><sup>CAAC</sup>), 26.5 (CH(CH<sub>3</sub>)<sub>2</sub><sup>Dip</sup>), 25.4 (CH(CH<sub>3</sub>)<sub>2</sub><sup>Dip</sup>), 24.8 (CH<sub>3</sub><sup>Mes</sup>), 24.5 (CH(CH<sub>3</sub>)<sub>2</sub><sup>Dip</sup>), 23.6 (CH(CH<sub>3</sub>)<sub>2</sub><sup>Dip</sup>), 21.6 (CH<sub>3</sub><sup>Mes</sup>) ppm. <sup>11</sup>B NMR (160.5 MHz, C<sub>6</sub>D<sub>6</sub>, 297 K):  $\delta$  = 35.8 ppm. Elemental analysis for [C<sub>18</sub>H<sub>22</sub>B<sub>2</sub>Cl<sub>2</sub>] (*M<sub>w</sub>* = 858.96 g mol<sup>-1</sup>): calcd. C 81.10, H 9.86, N 6.52%, found C 79.34, H 9.86, N 6.32%. HRMS LIFDI for [C<sub>18</sub>H<sub>22</sub>B<sub>2</sub>Cl<sub>2</sub>] (*m/z*): calcd. 857.6798, found 857.6783.

## NMR spectra of isolated compounds

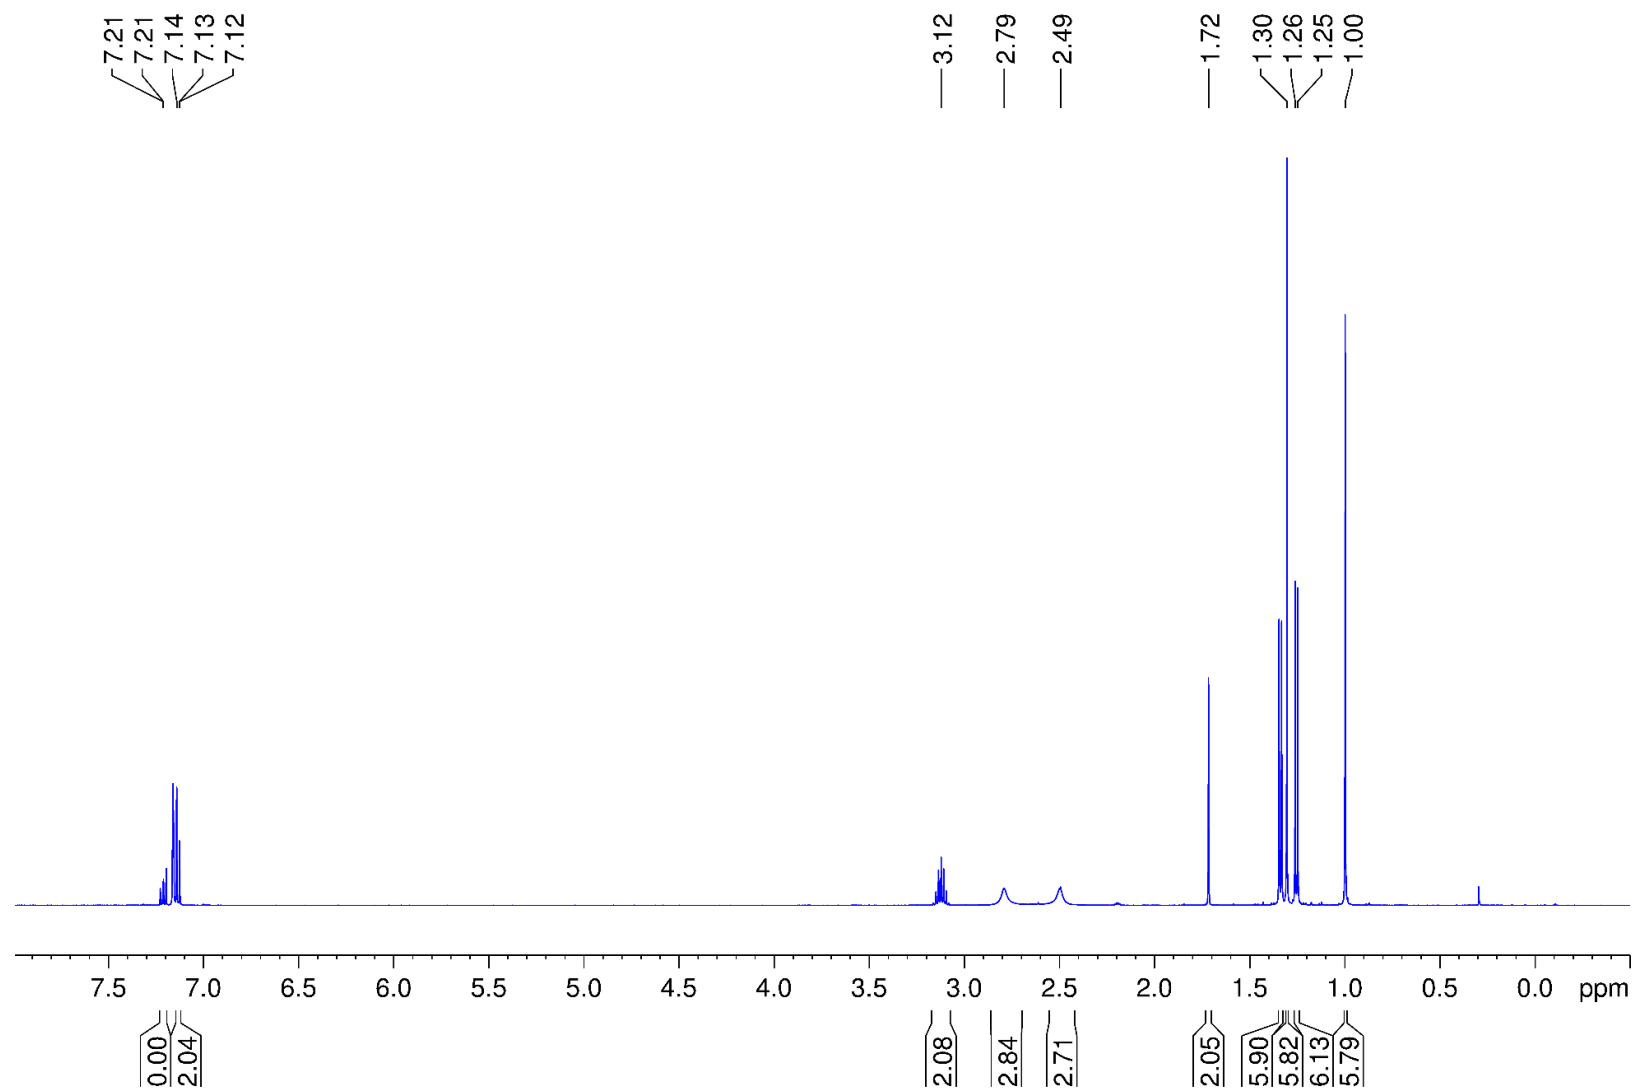

Figure S1.  $^1\text{H}\{^{11}\text{B}\}$  NMR spectrum of  $2\text{-Cl-NMe}_2$  in  $\text{C}_6\text{D}_6$ .

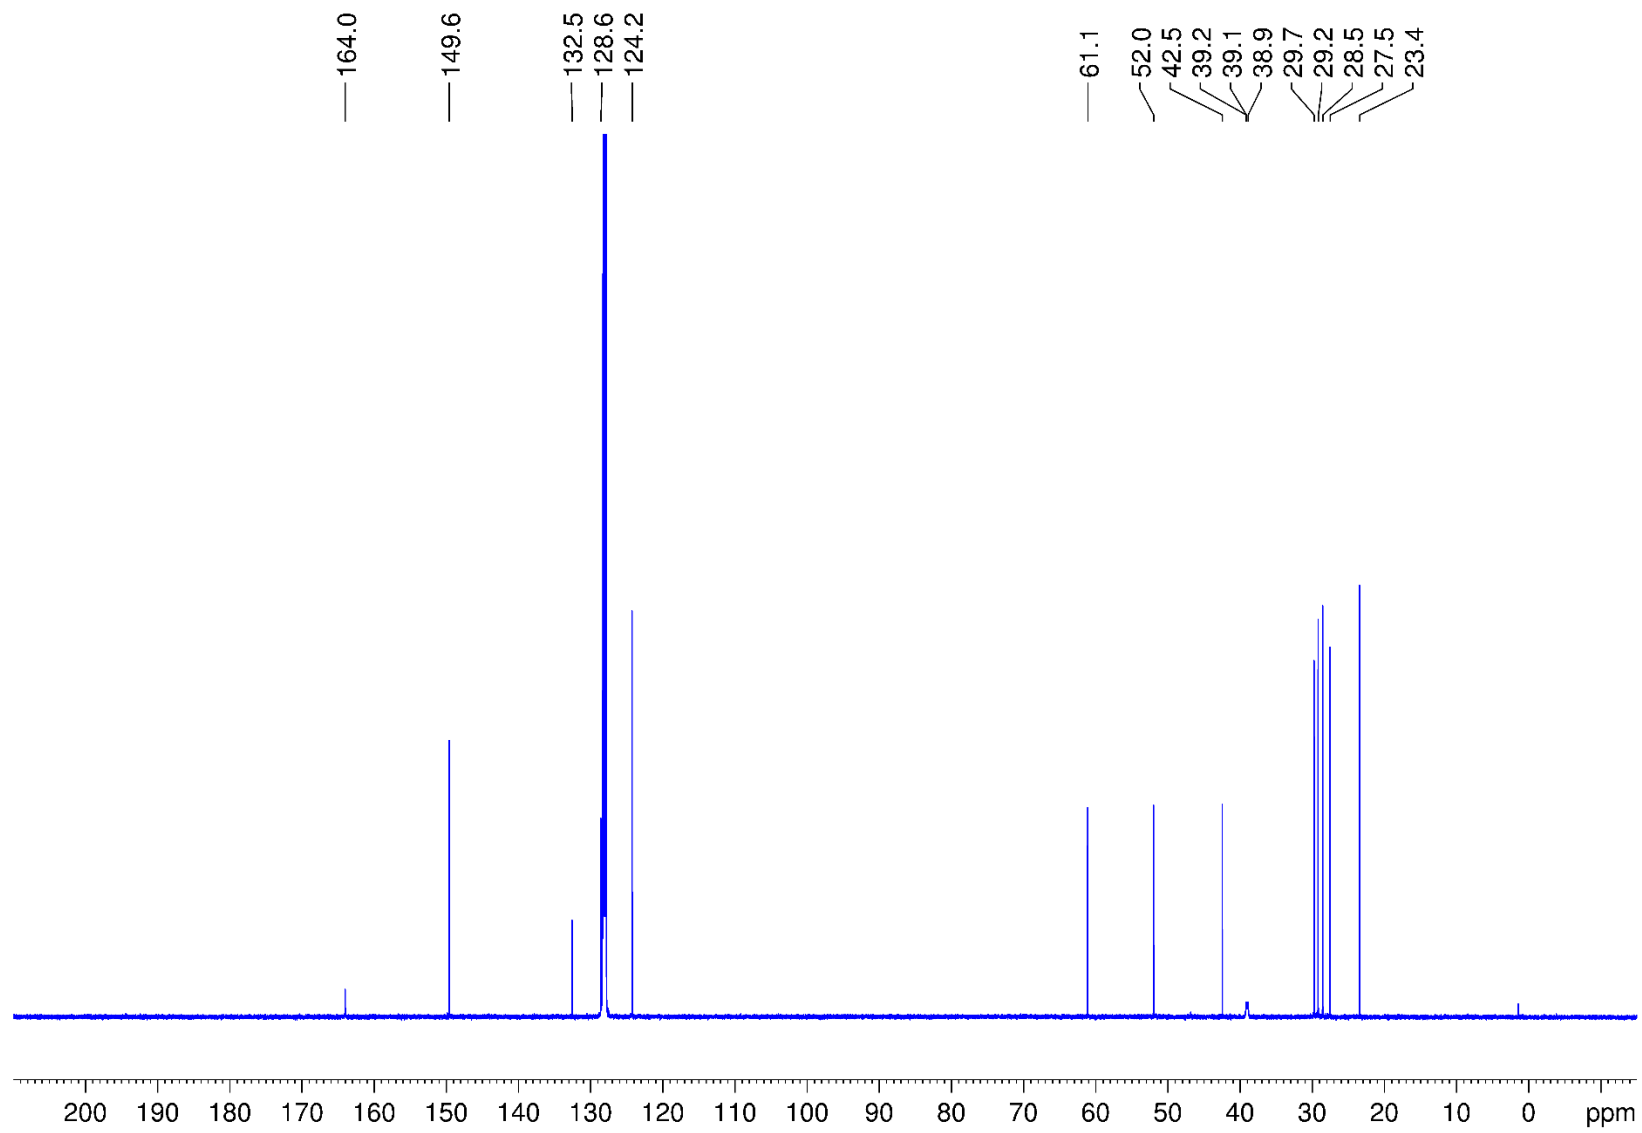

**Figure S2.**  $^{13}\text{C}\{^1\text{H}\}$  NMR spectrum of  $2\text{-Cl-NMe}_2$  in  $\text{C}_6\text{D}_6$ .

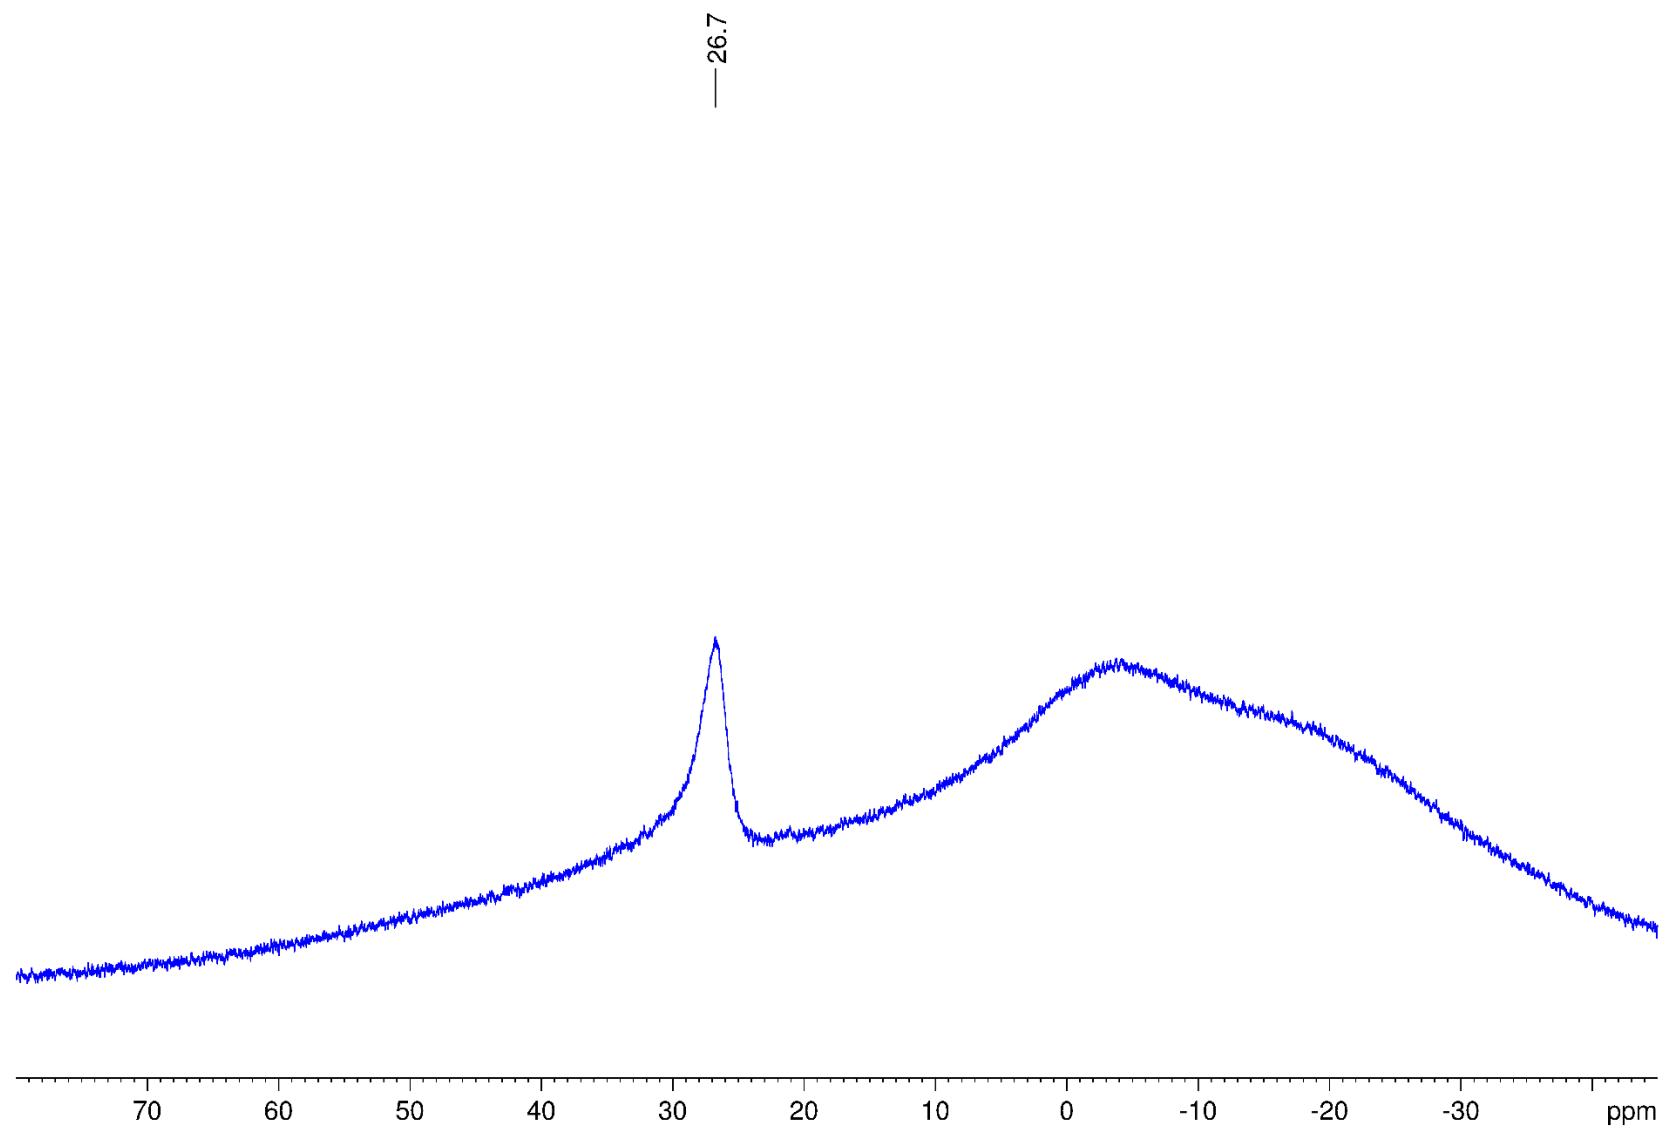

**Figure S3.**  $^{11}\text{B}$  NMR spectrum of  $2^{13}\text{C}\text{-NMe}_2$  in  $\text{C}_6\text{D}_6$ .

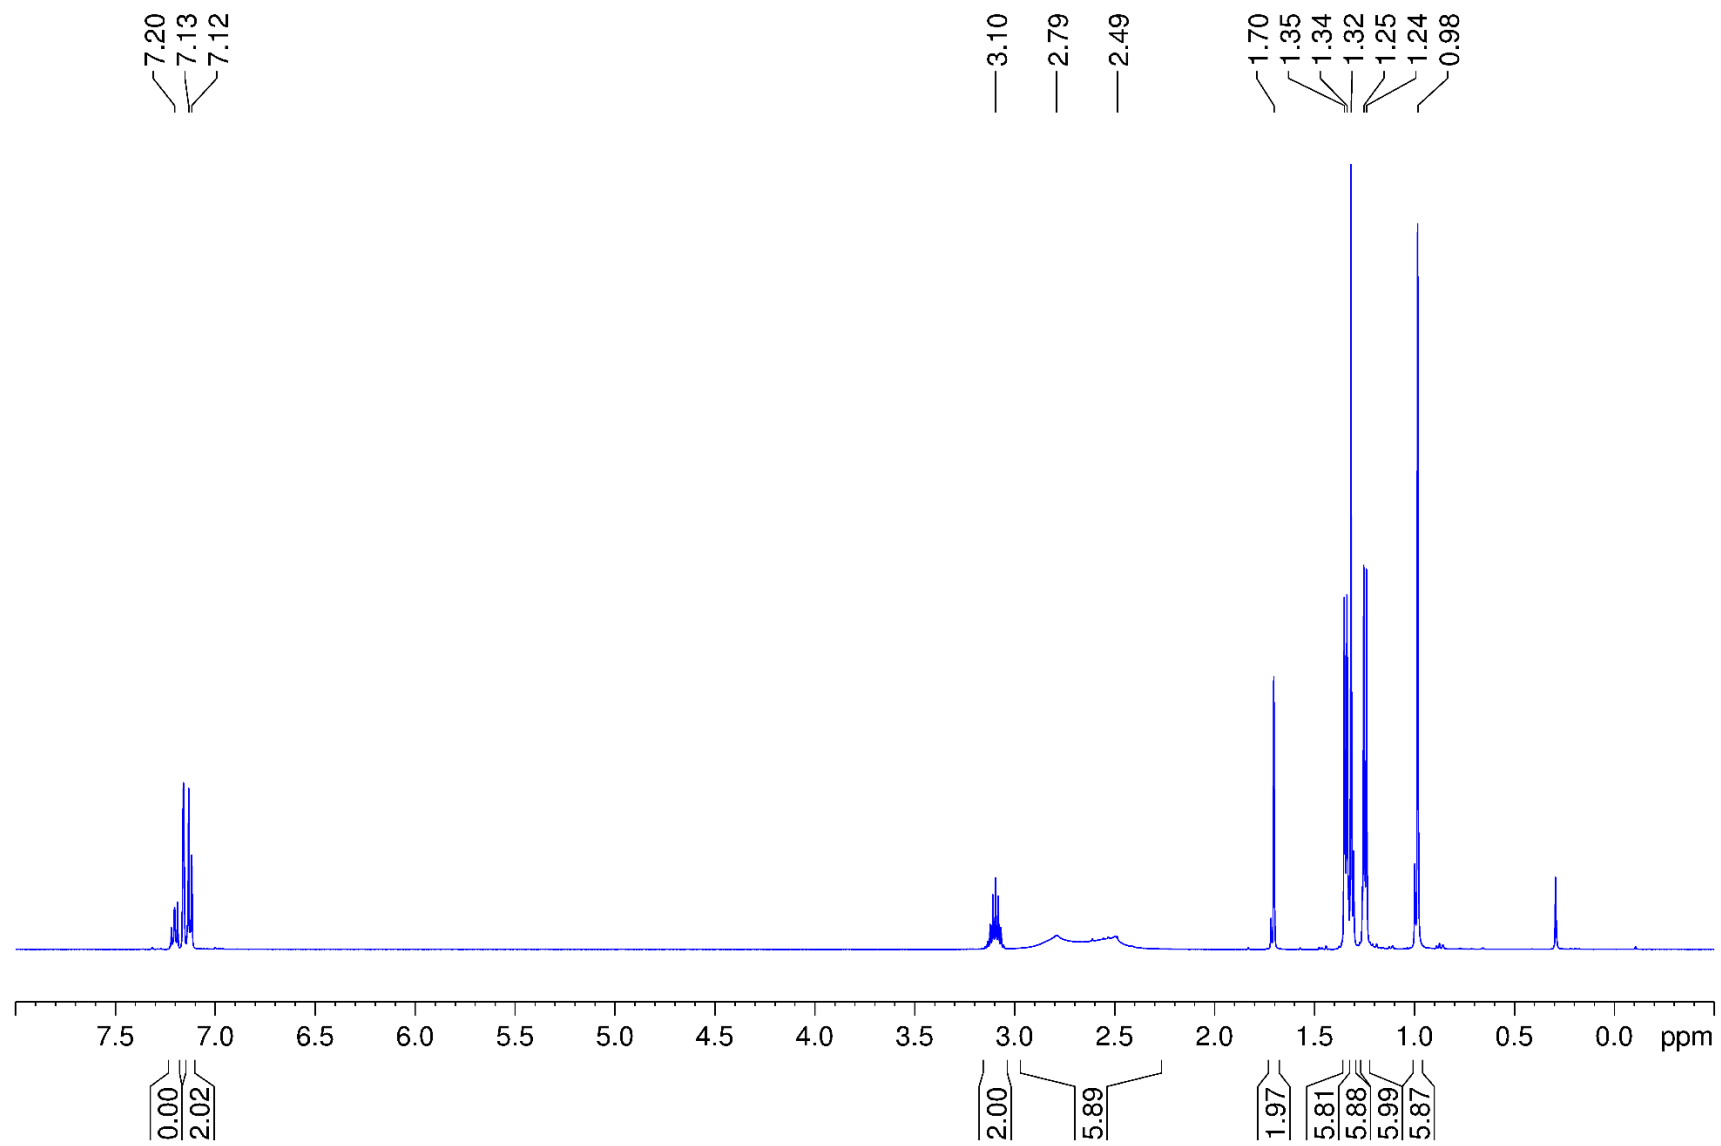

**Figure S4.**  $^1\text{H}\{^{11}\text{B}\}$  NMR spectrum of  $2^{\text{Br}}\text{-NMe}_2$  in  $\text{C}_6\text{D}_6$ .

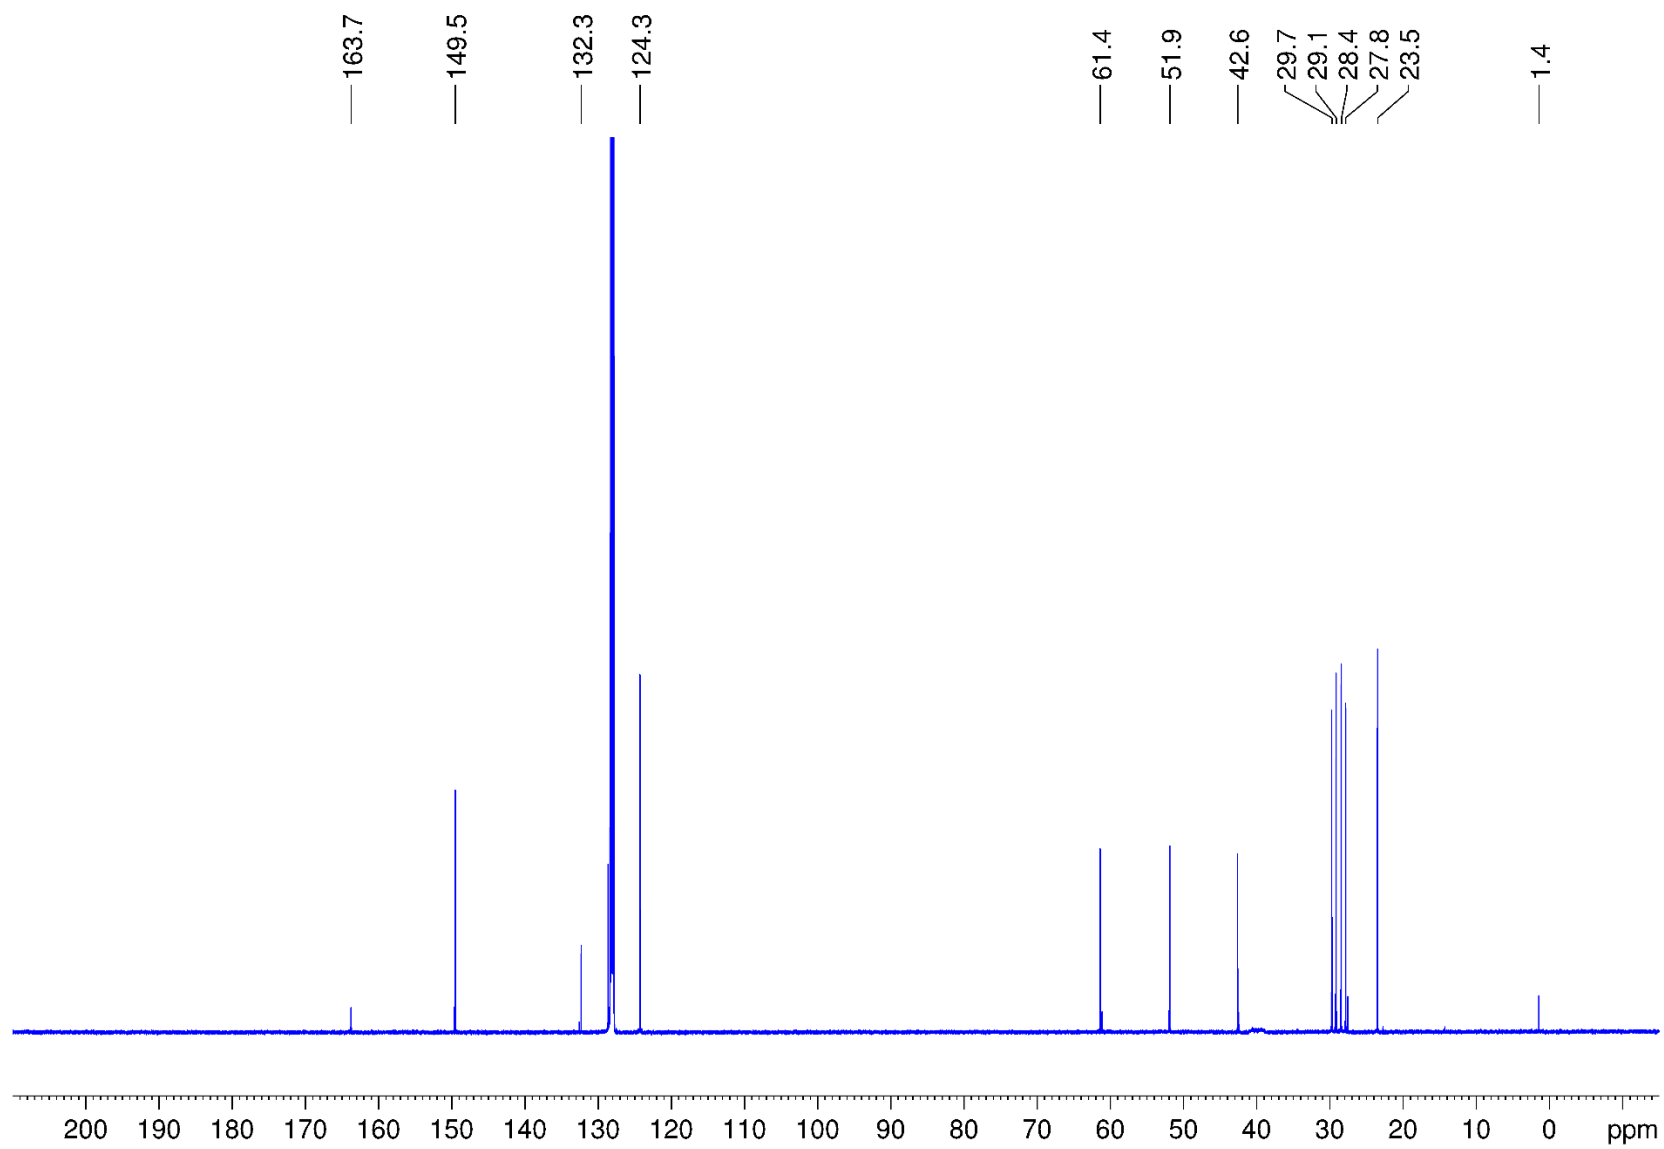

**Figure S5.**  $^{13}\text{C}\{^1\text{H}\}$  NMR spectrum of  $2^{\text{Br}}\text{-NMe}_2$  in  $\text{C}_6\text{D}_6$ .

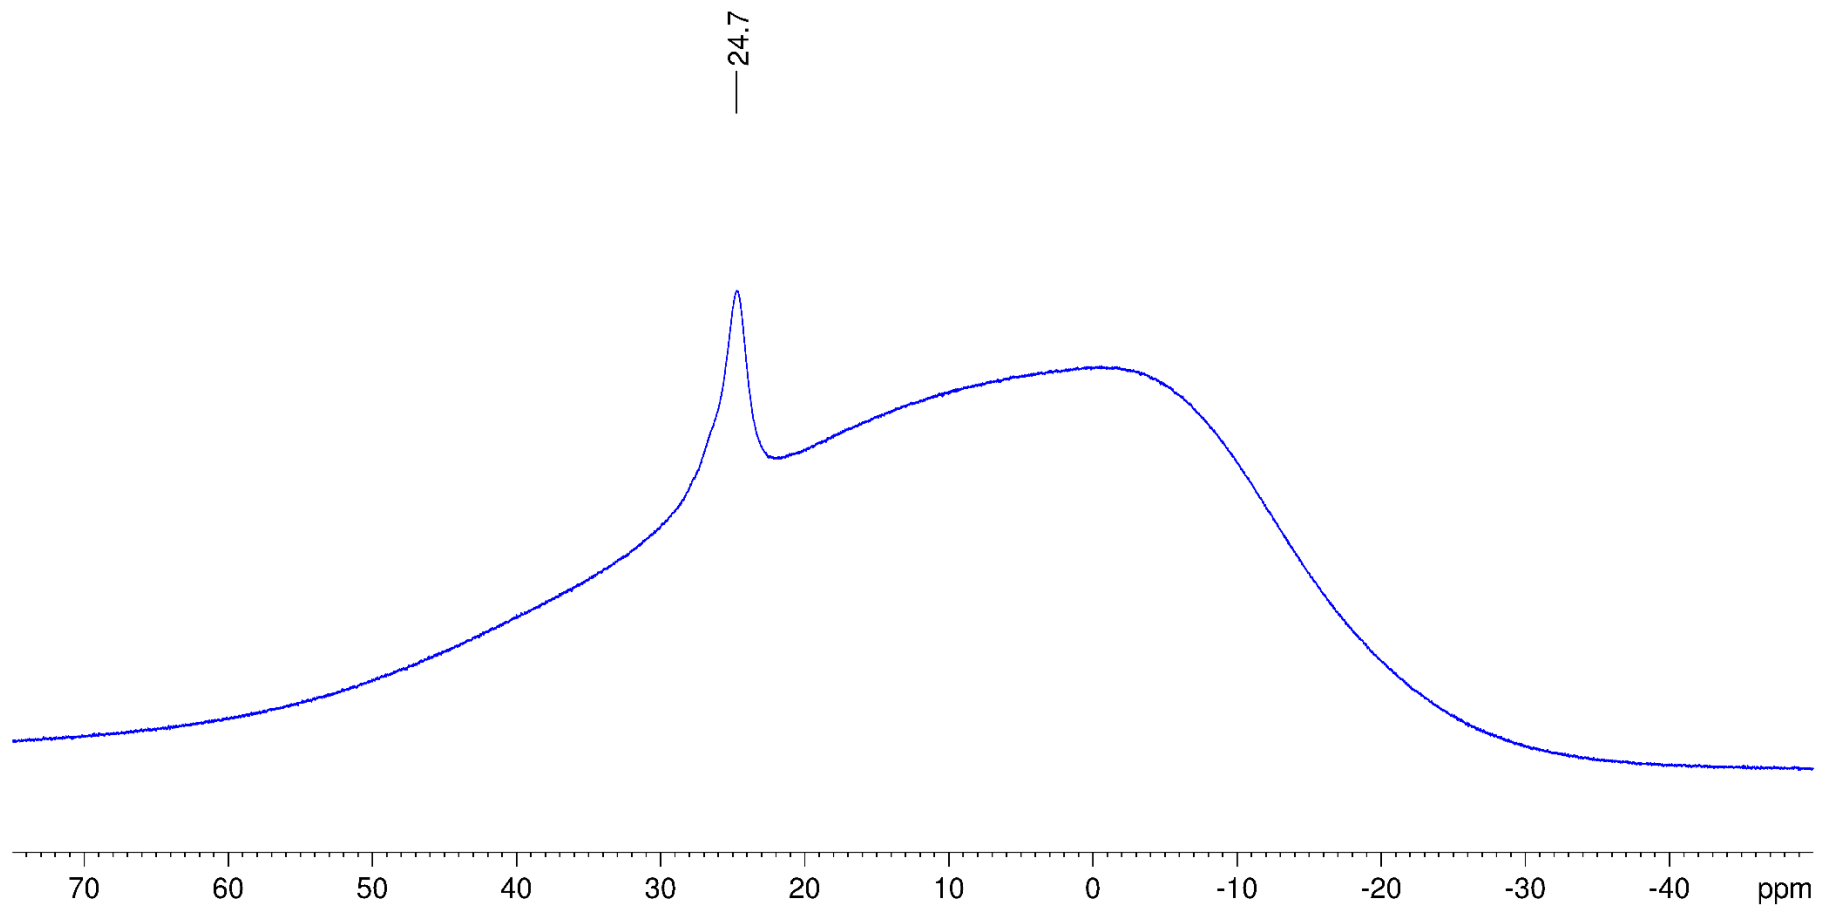

**Figure S6.**  $^{11}\text{B}$  NMR spectrum of  $2^{\text{Br}}\text{-NMe}_2$  in  $\text{C}_6\text{D}_6$ .



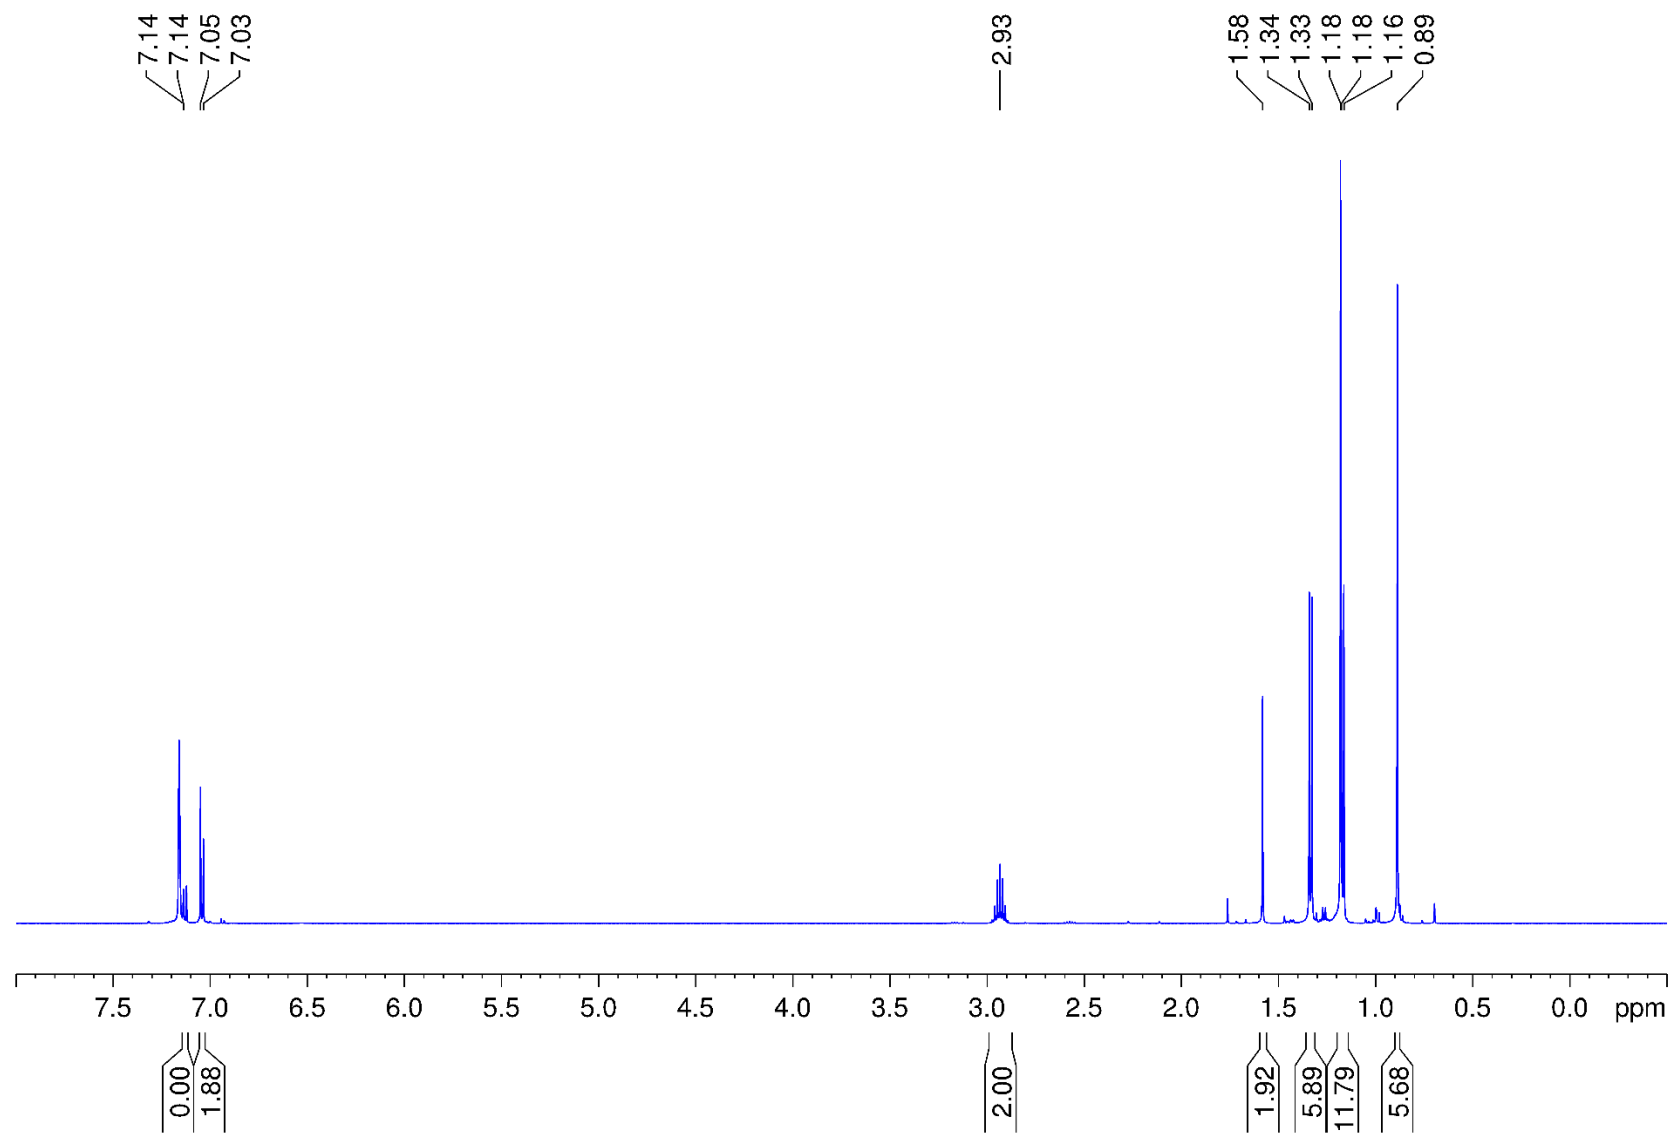

**Figure S7.**  $^1\text{H}\{^{11}\text{B}\}$  NMR spectrum of  $2^{\text{Cl}}\text{-Cl}$  in  $\text{C}_6\text{D}_6$ .

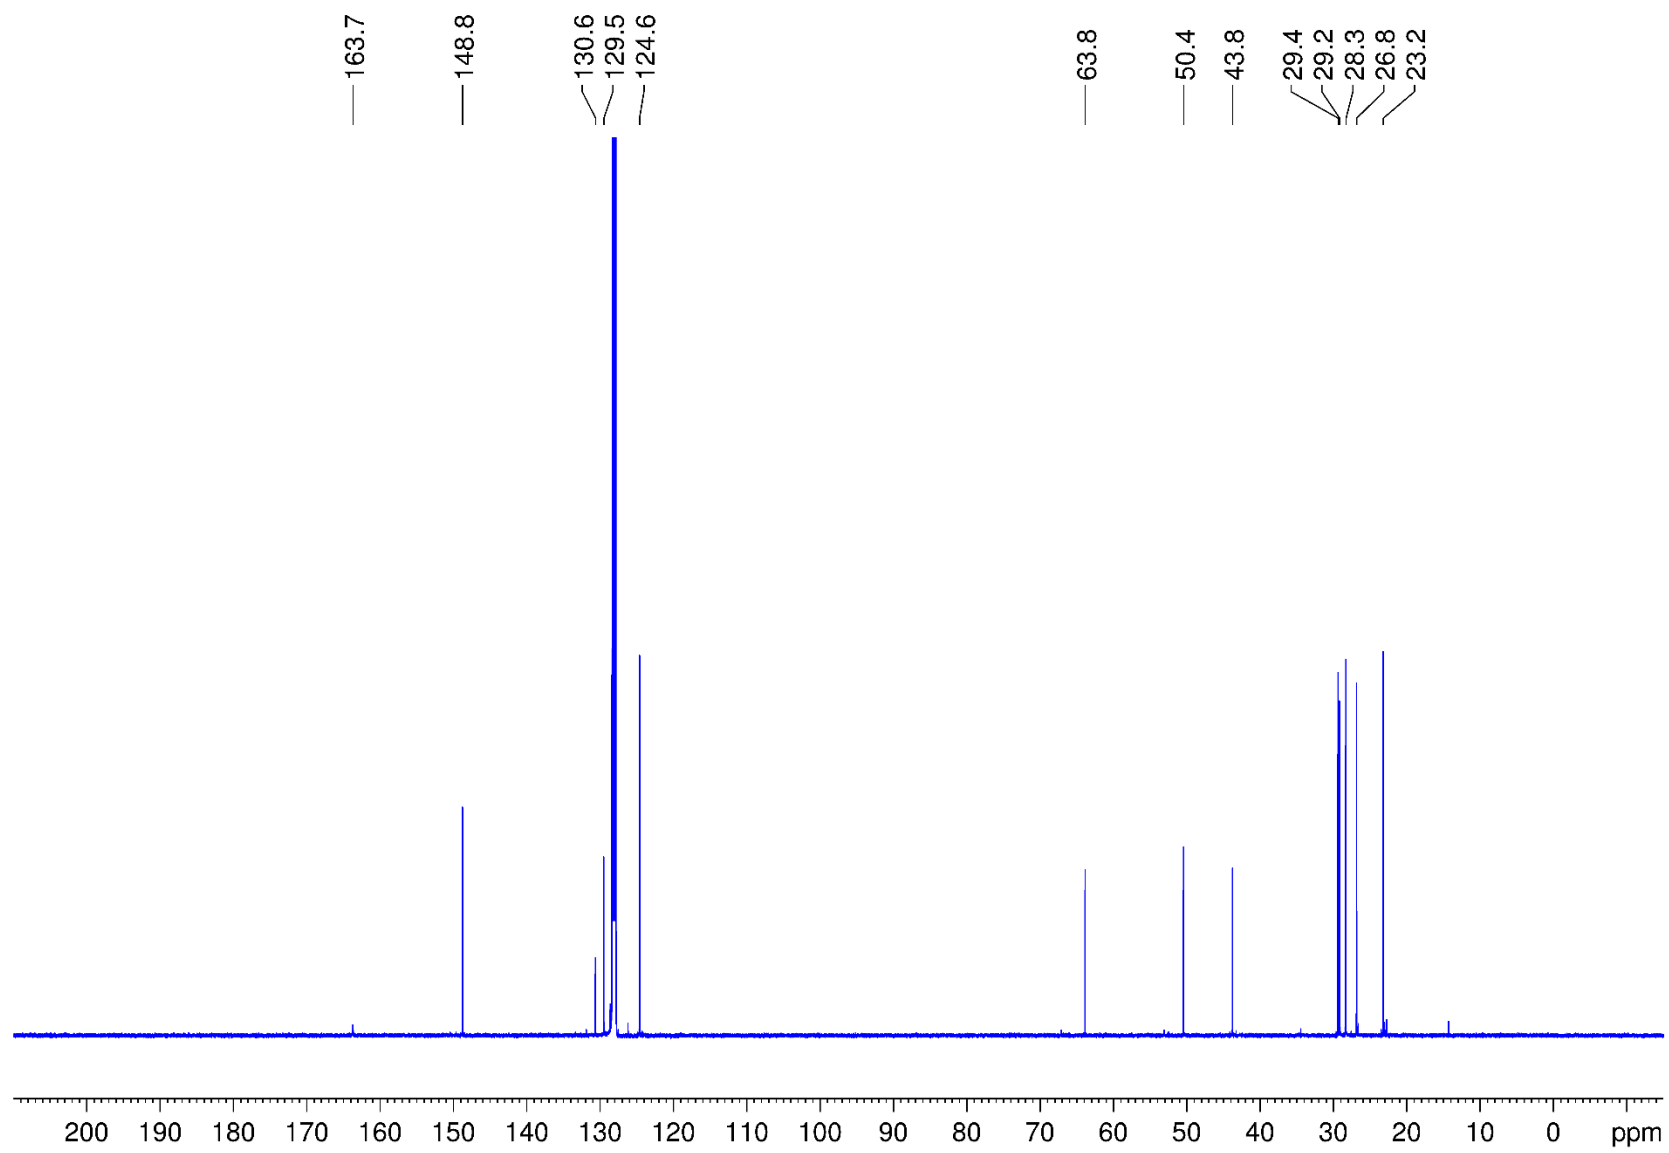

**Figure S8.**  $^{13}\text{C}\{^1\text{H}\}$  NMR spectrum of  $2^{\text{Cl}}\text{-Cl}$  in  $\text{C}_6\text{D}_6$ .

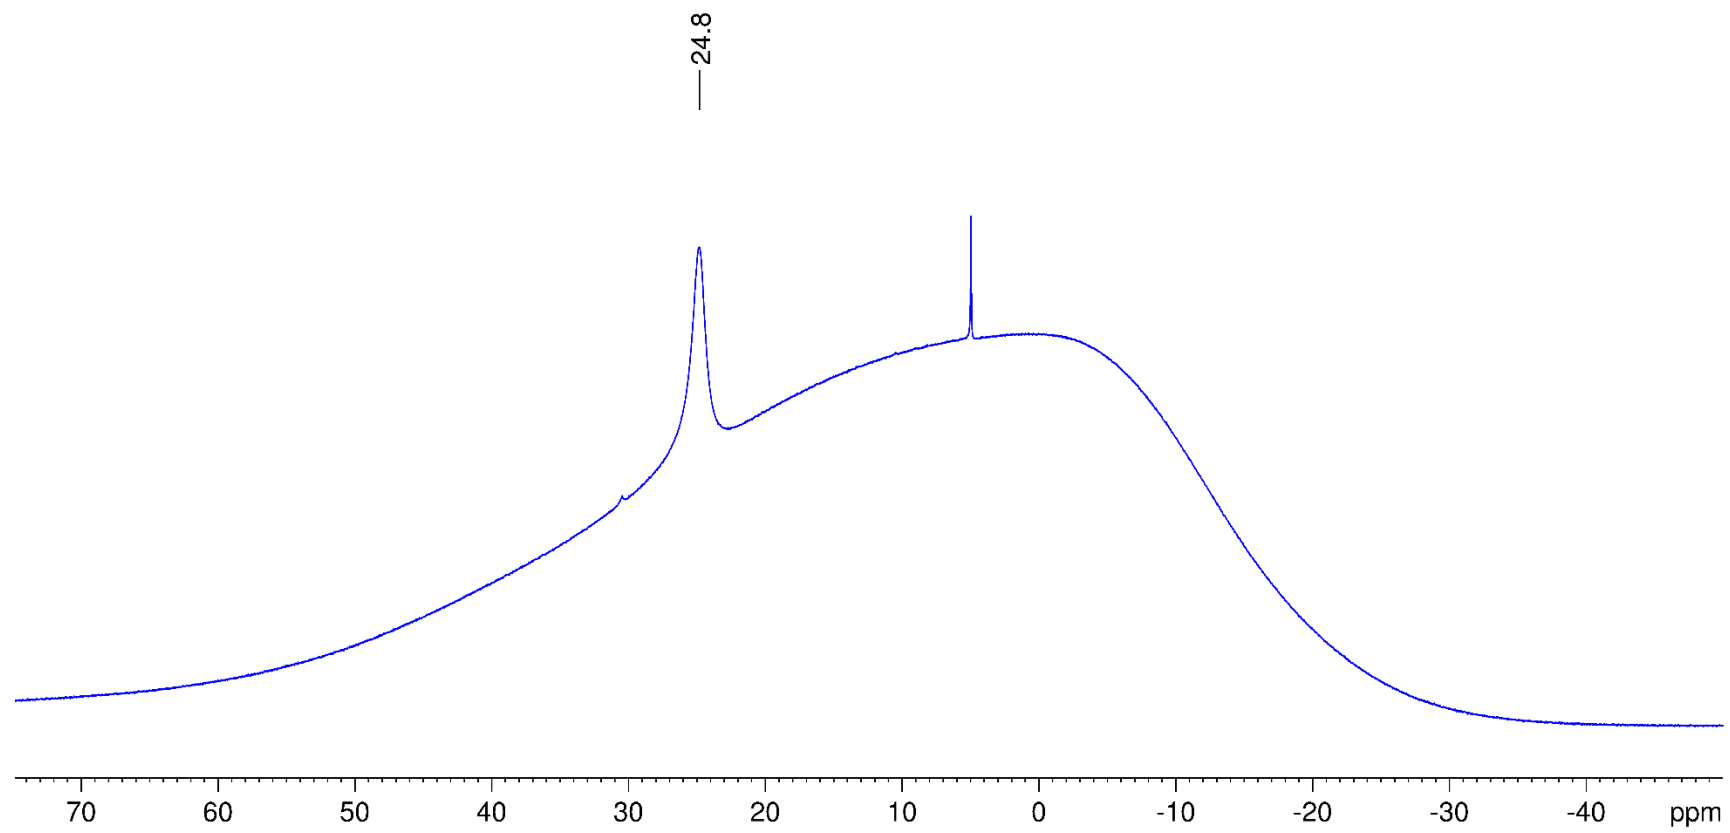

**Figure S9.**  $^{11}\text{B}$  NMR spectrum of  $2^{\text{Cl}}\text{-Cl}$  in  $\text{C}_6\text{D}_6$ .

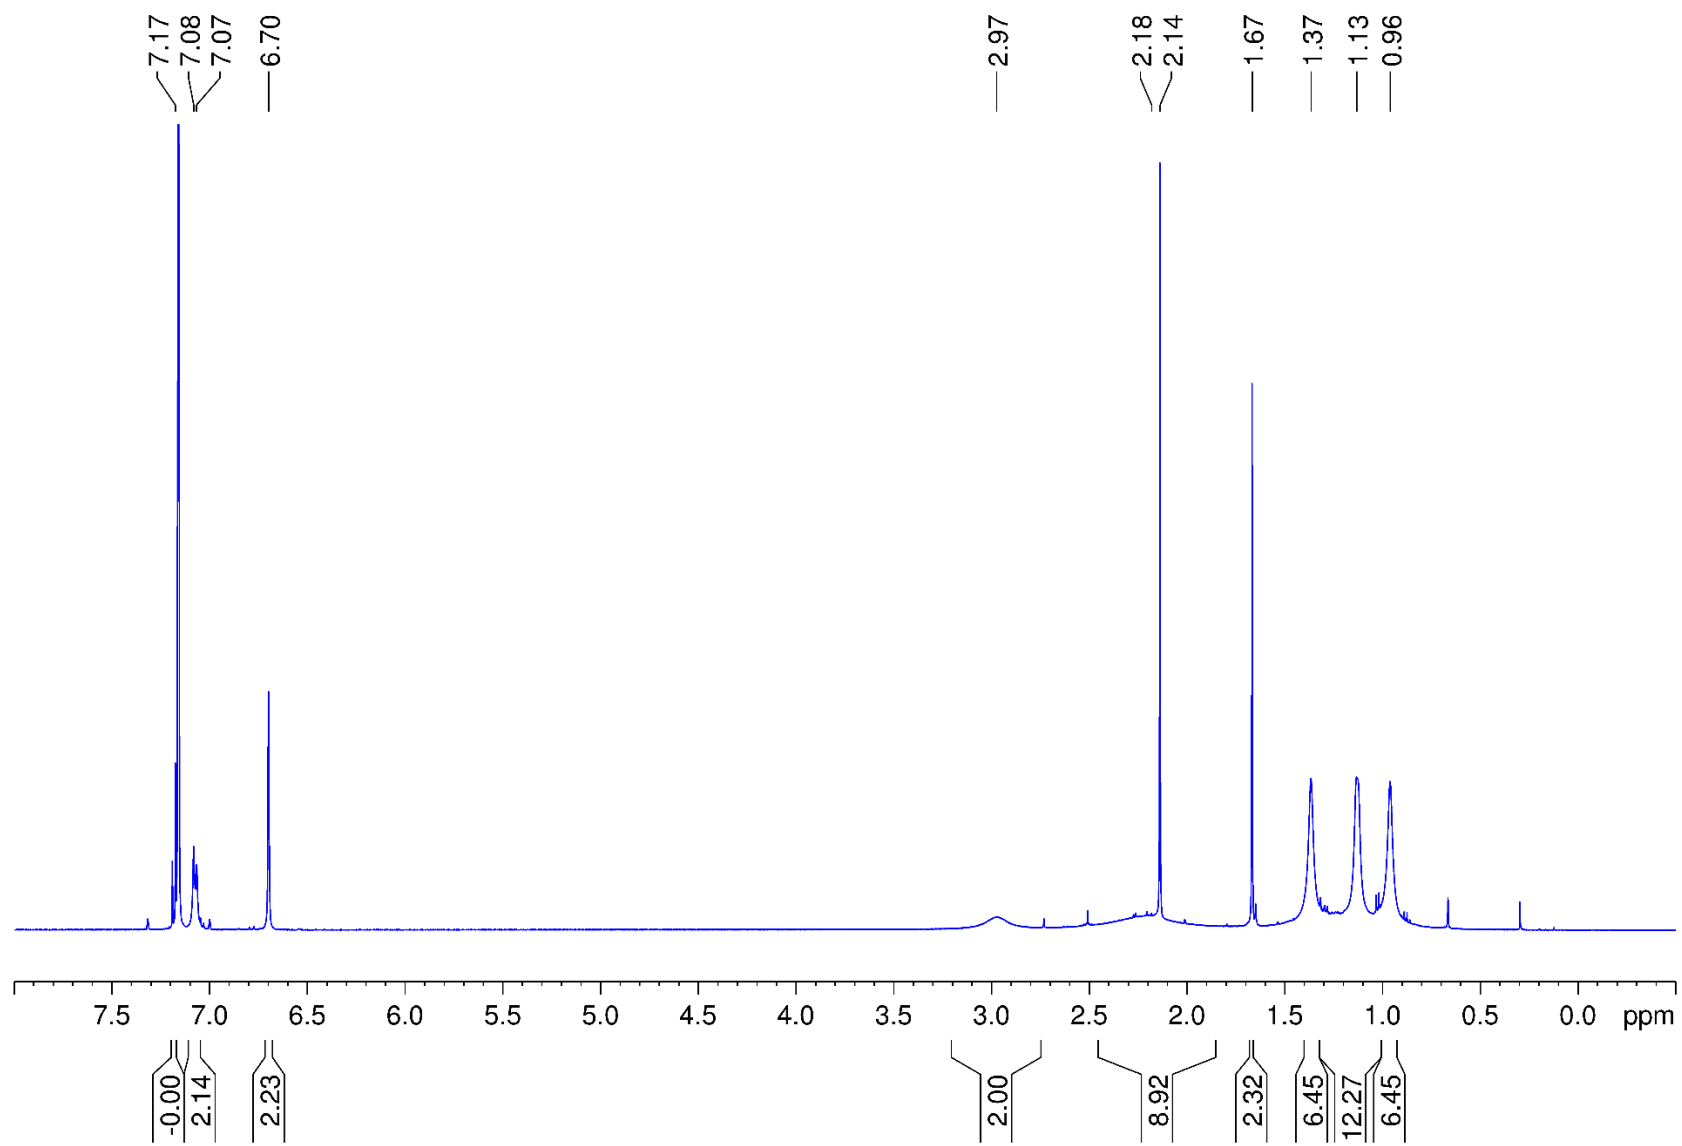

**Figure S10.**  $^1\text{H}\{^{11}\text{B}\}$  NMR spectrum of  $2^{\text{Cl}}\text{-Dur}$  in  $\text{C}_6\text{D}_6$ .

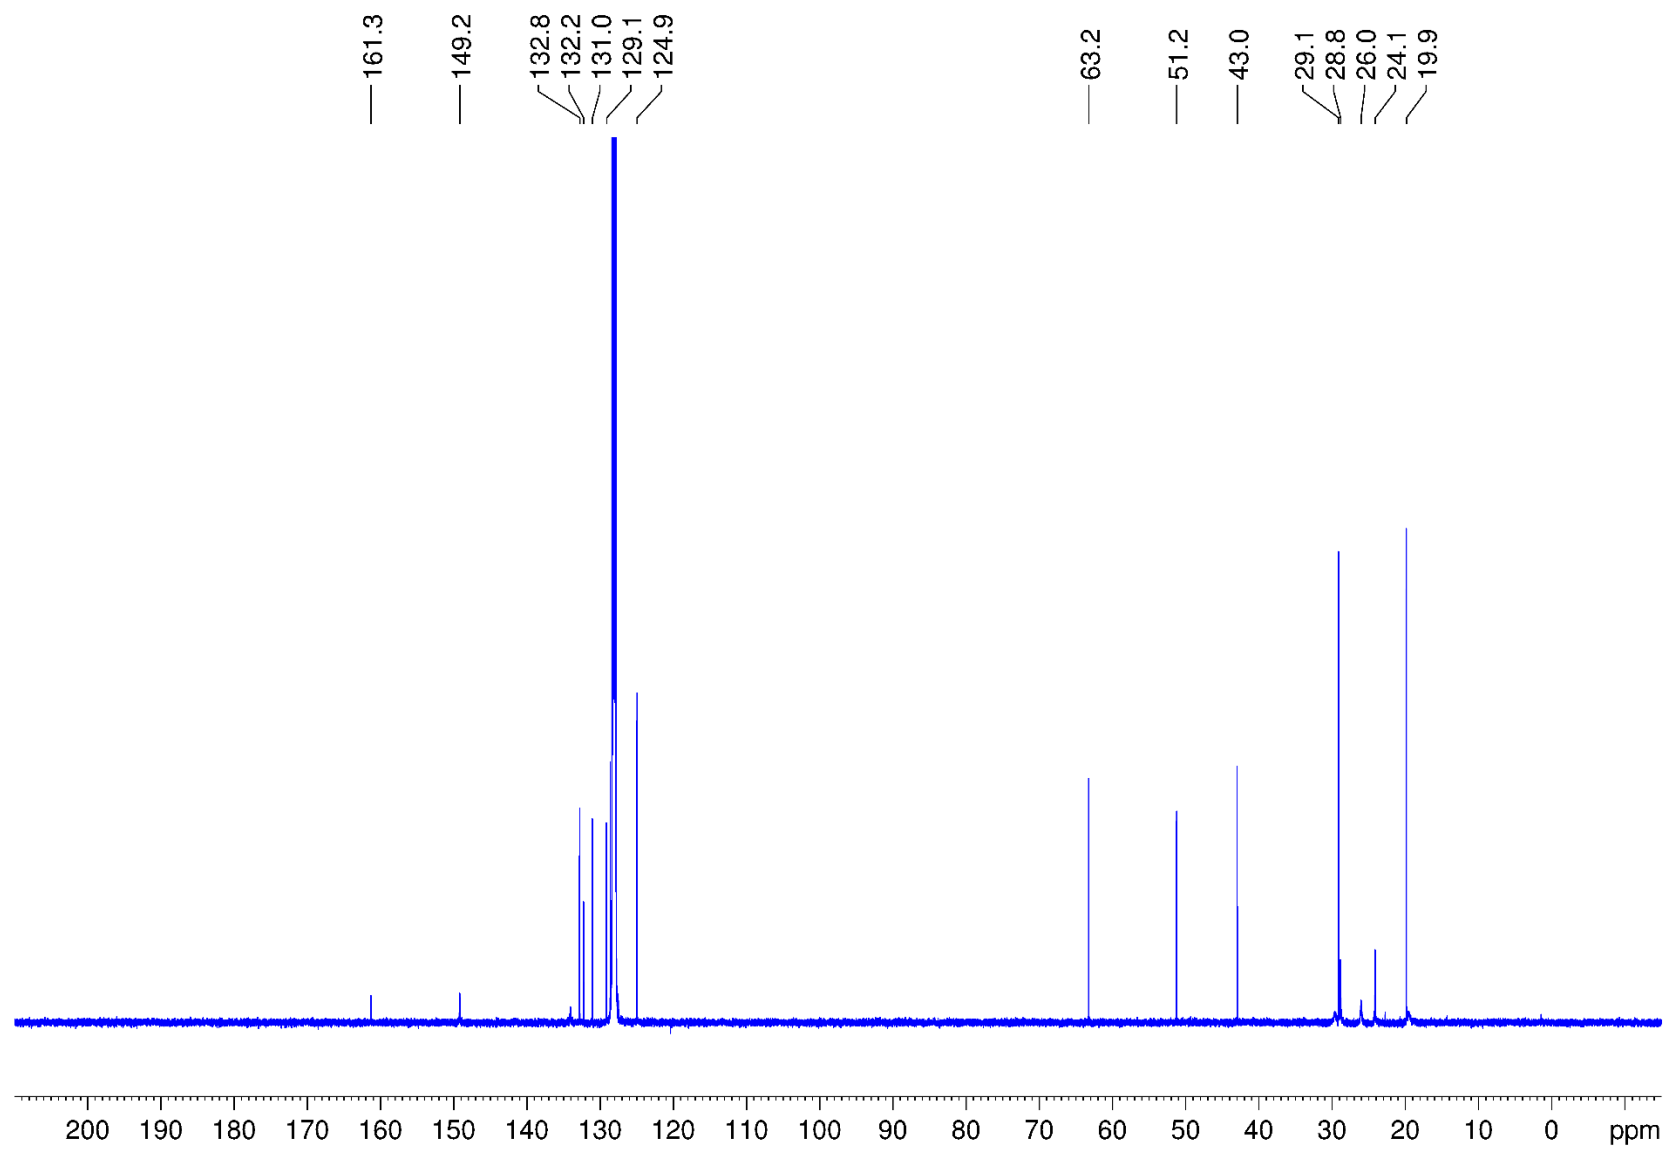

**Figure S11.**  $^{13}\text{C}\{^1\text{H}\}$  NMR spectrum of  $2^{\text{Cl}}\text{-Dur}$  in  $\text{C}_6\text{D}_6$ .

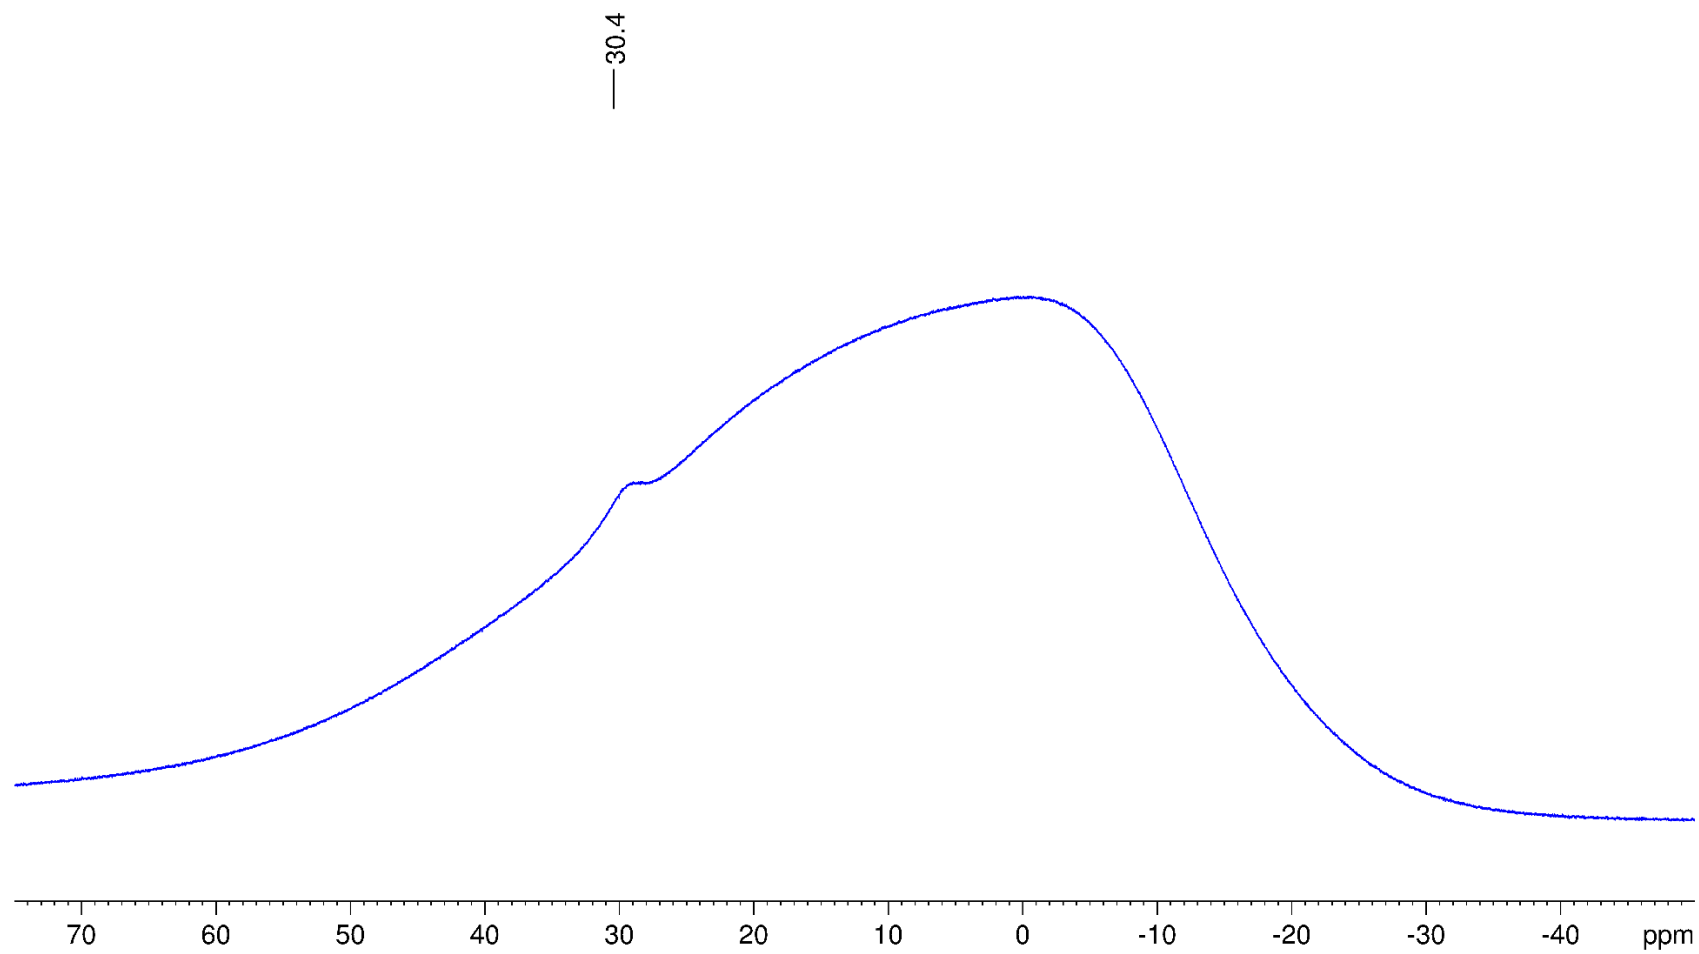

**Figure S12.**  $^{11}\text{B}$  NMR spectrum of  $2^{\text{Cl}}\text{-Dur}$  in  $\text{C}_6\text{D}_6$ .

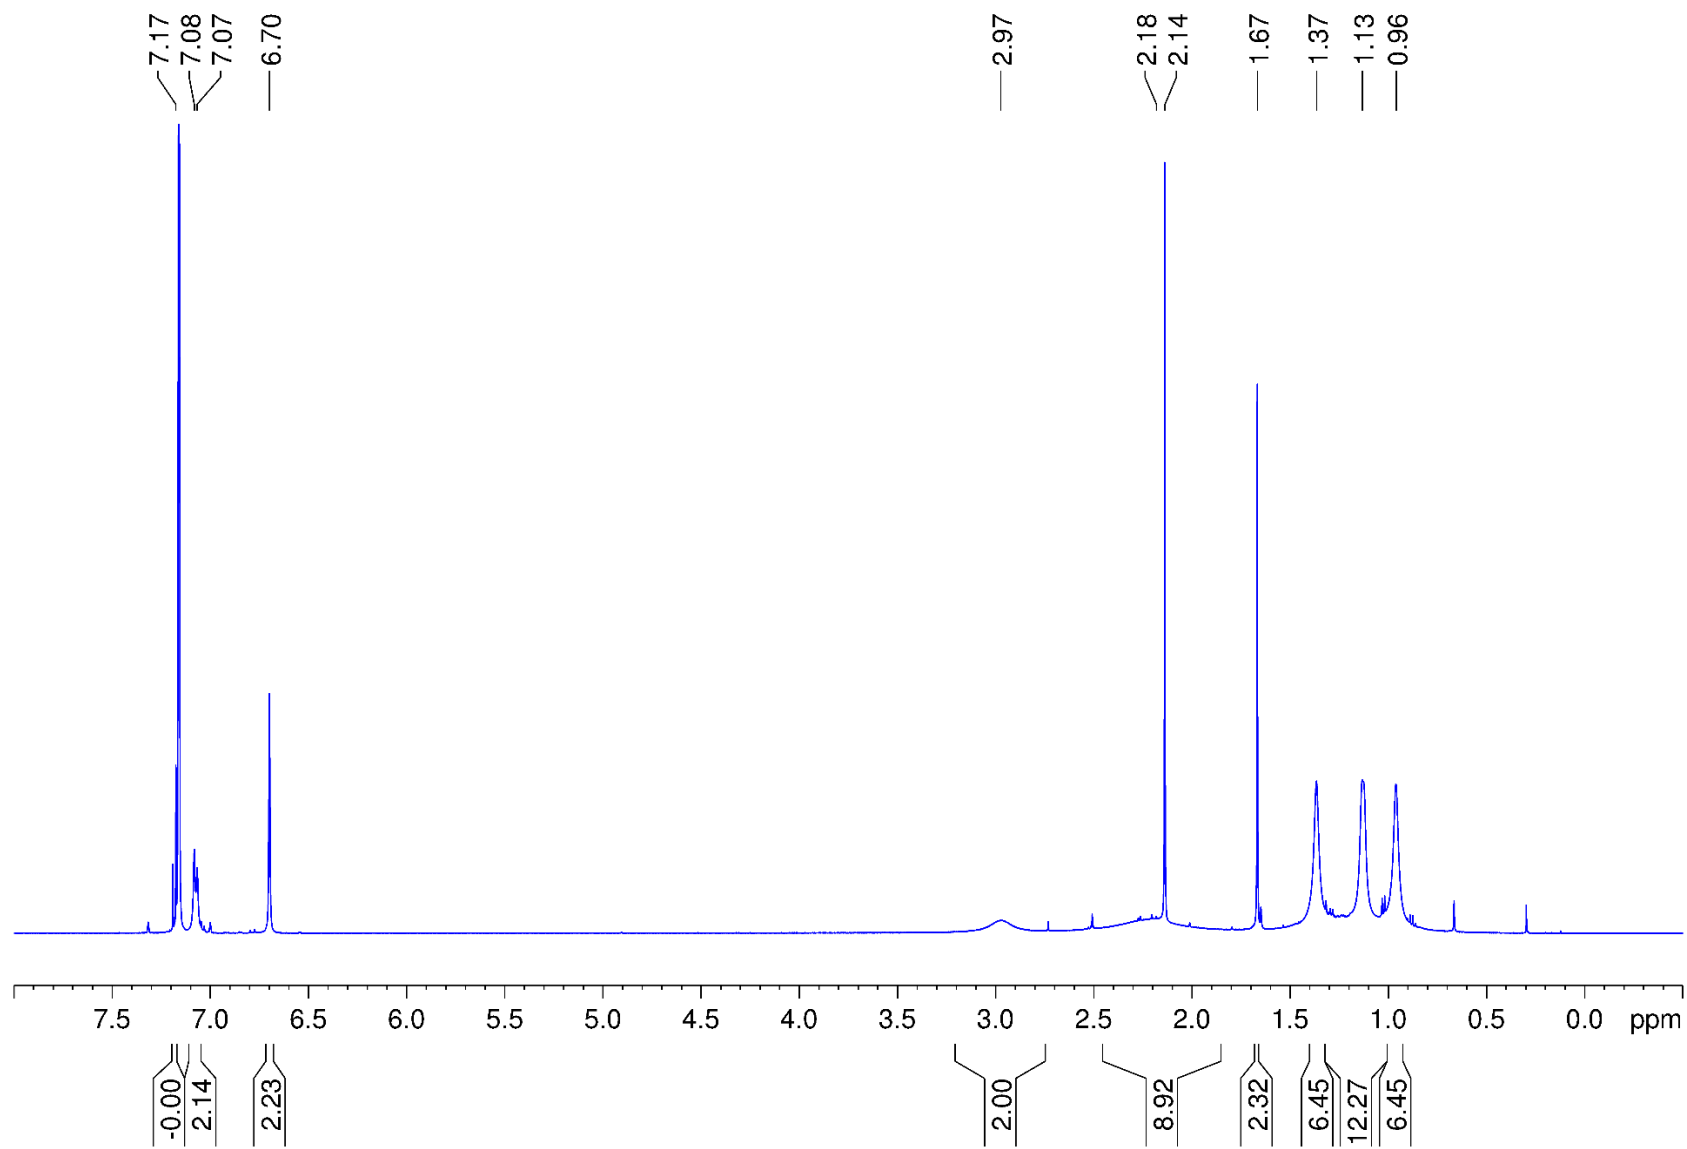

**Figure S13.**  $^1\text{H}\{^{11}\text{B}\}$  NMR spectrum of  $2^{\text{Br}}\text{-Mes}$  in  $\text{C}_6\text{D}_6$ .

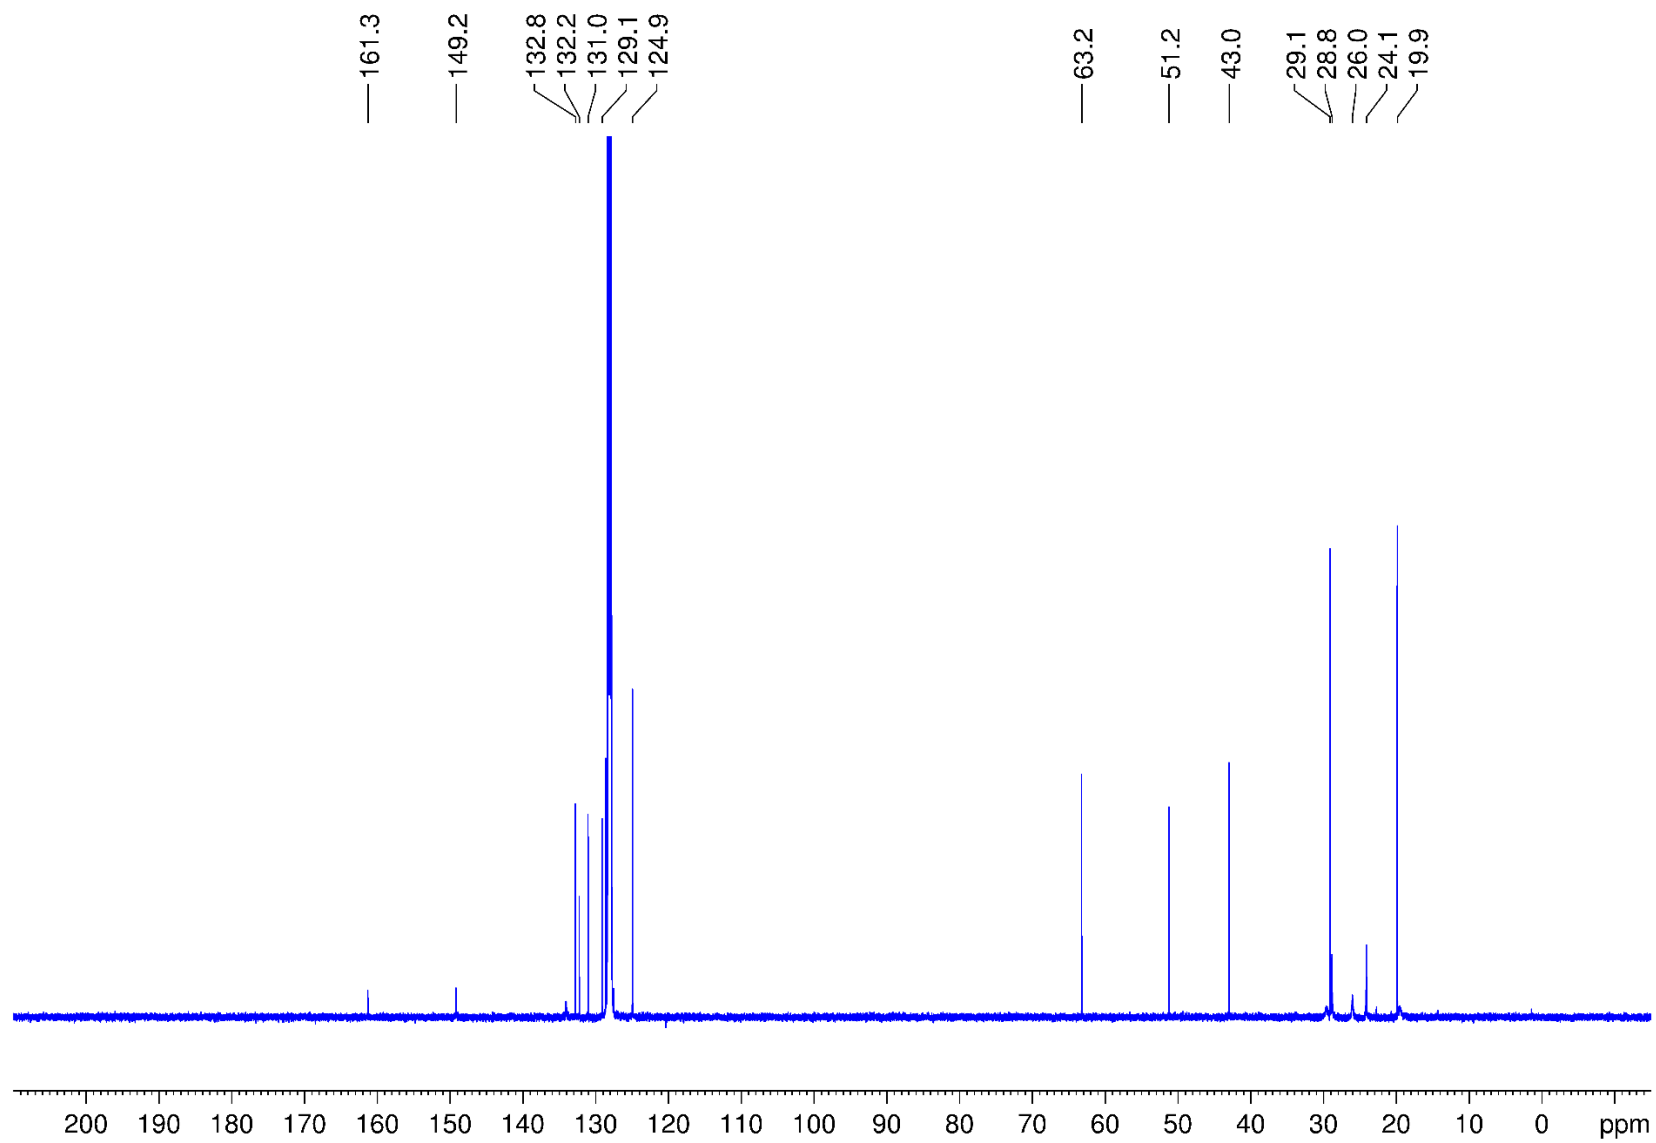

**Figure S14.**  $^{13}\text{C}\{^1\text{H}\}$  NMR spectrum of  $2^{\text{Br}}\text{-Mes}$  in  $\text{C}_6\text{D}_6$ .



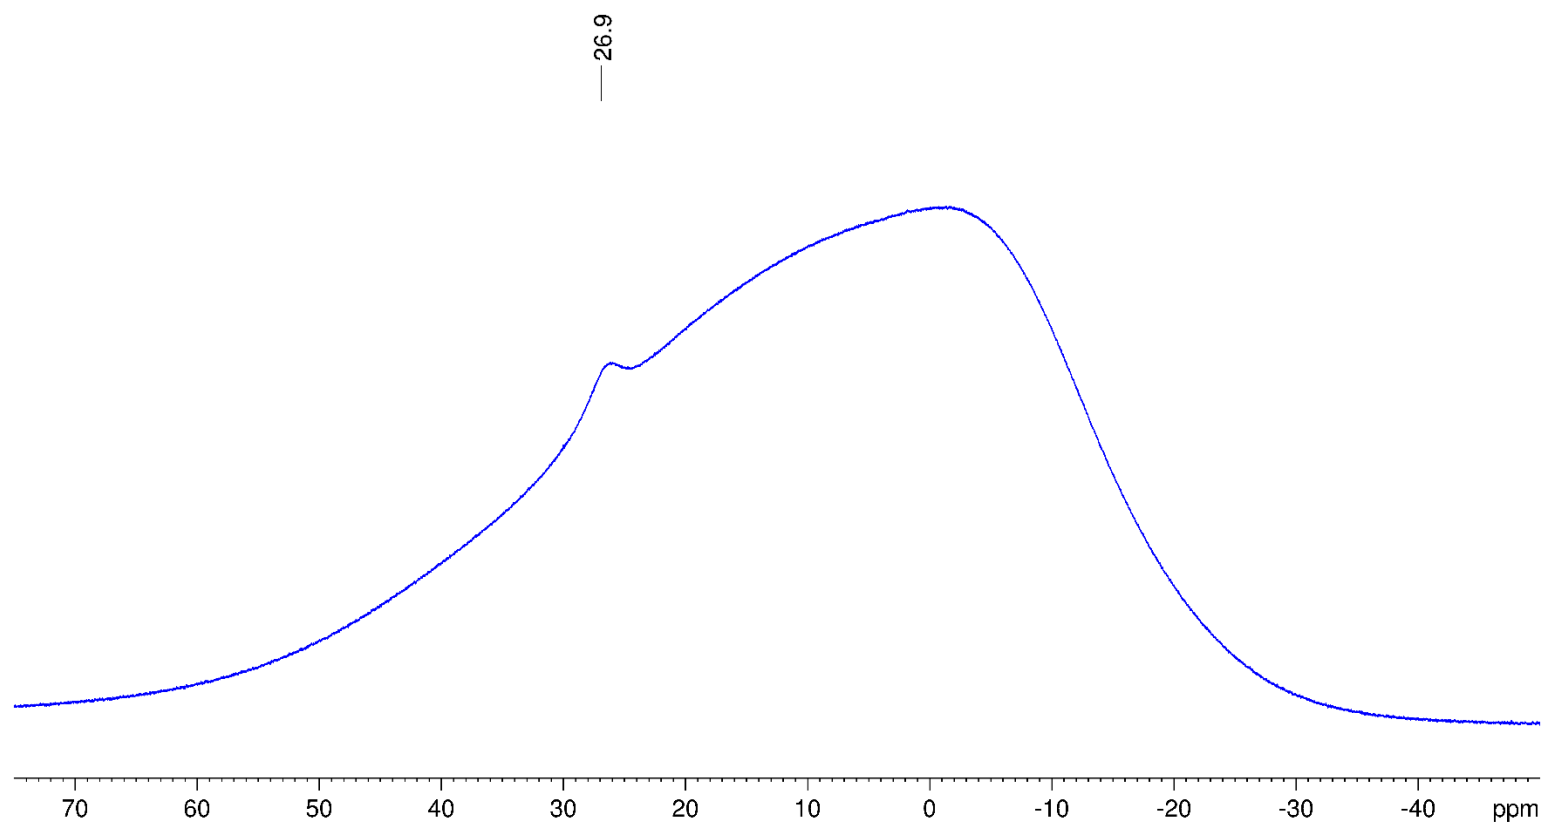

**Figure S15.**  $^{11}\text{B}$  NMR spectrum of  $2^{\text{Br}}\text{-Mes}$  in  $\text{C}_6\text{D}_6$ .

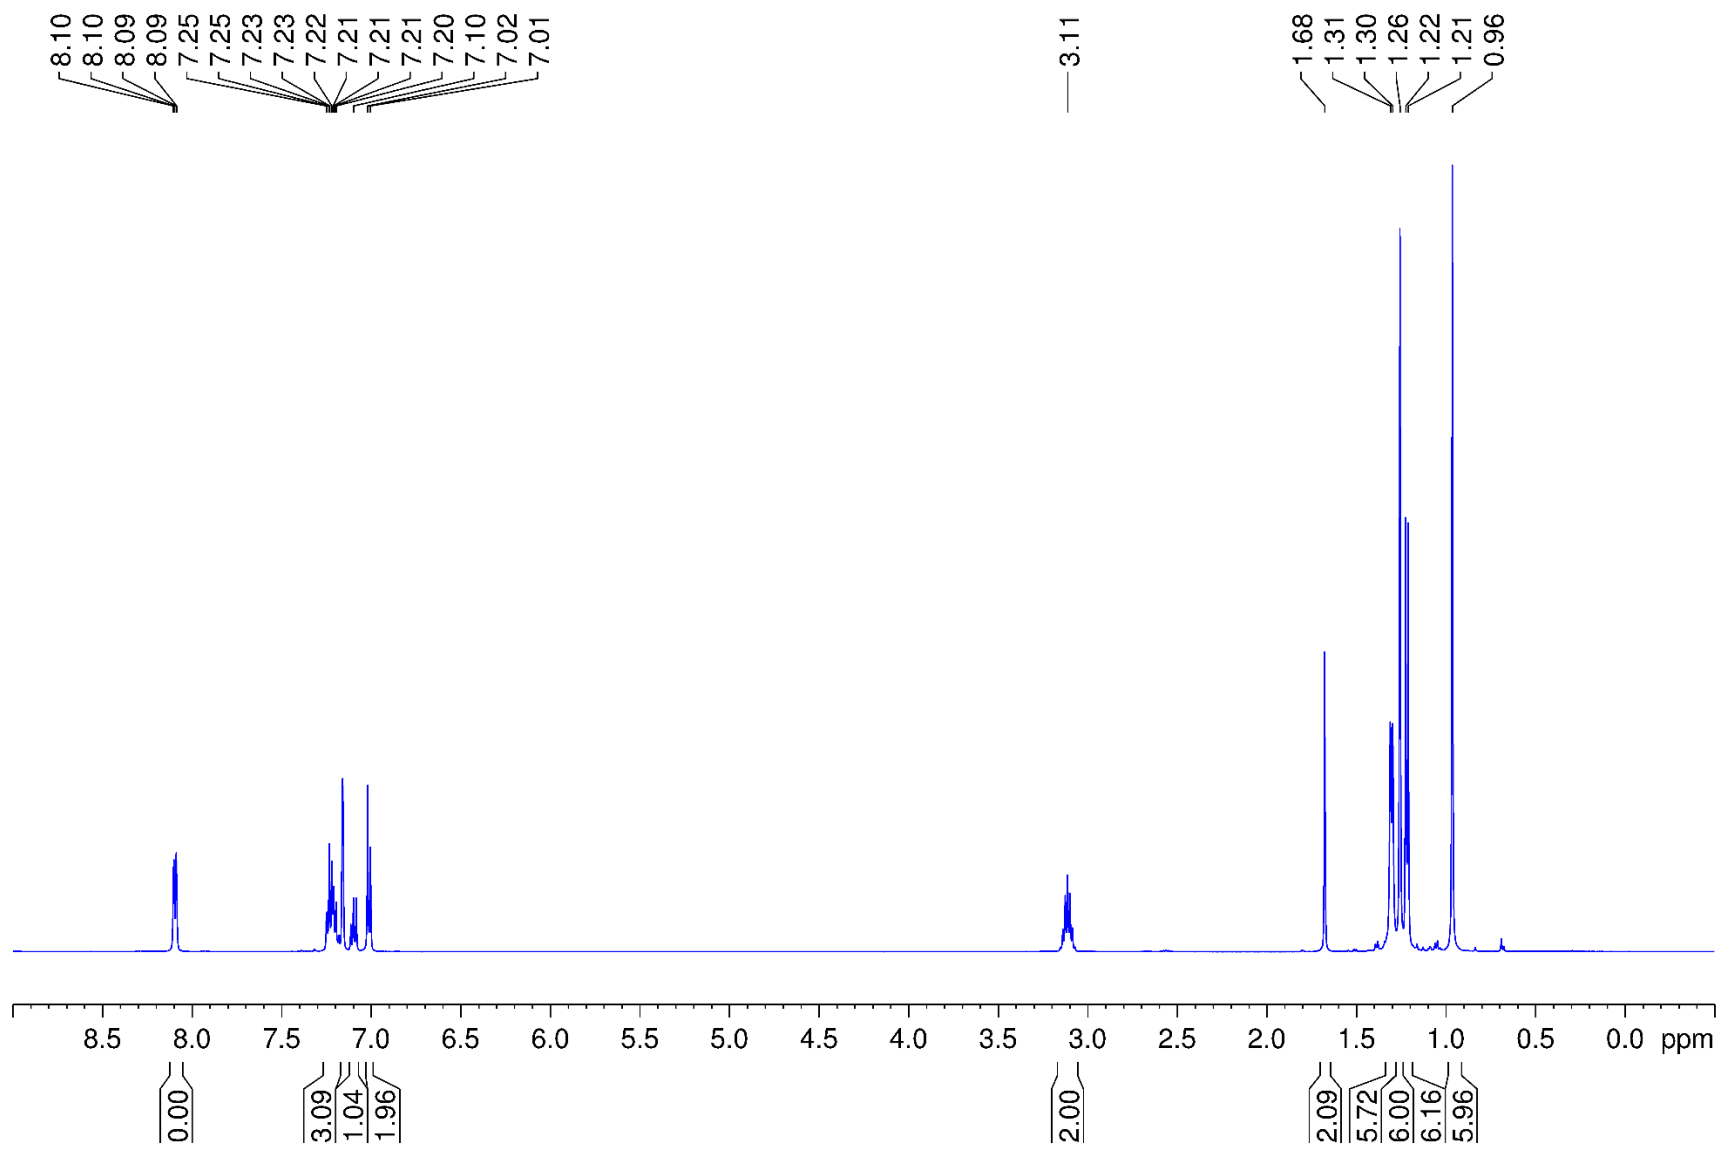

**Figure S16.**  $^1\text{H}\{^{11}\text{B}\}$  NMR spectrum of  $2^{\text{Br}}\text{-Ph}$  in  $\text{C}_6\text{D}_6$ .

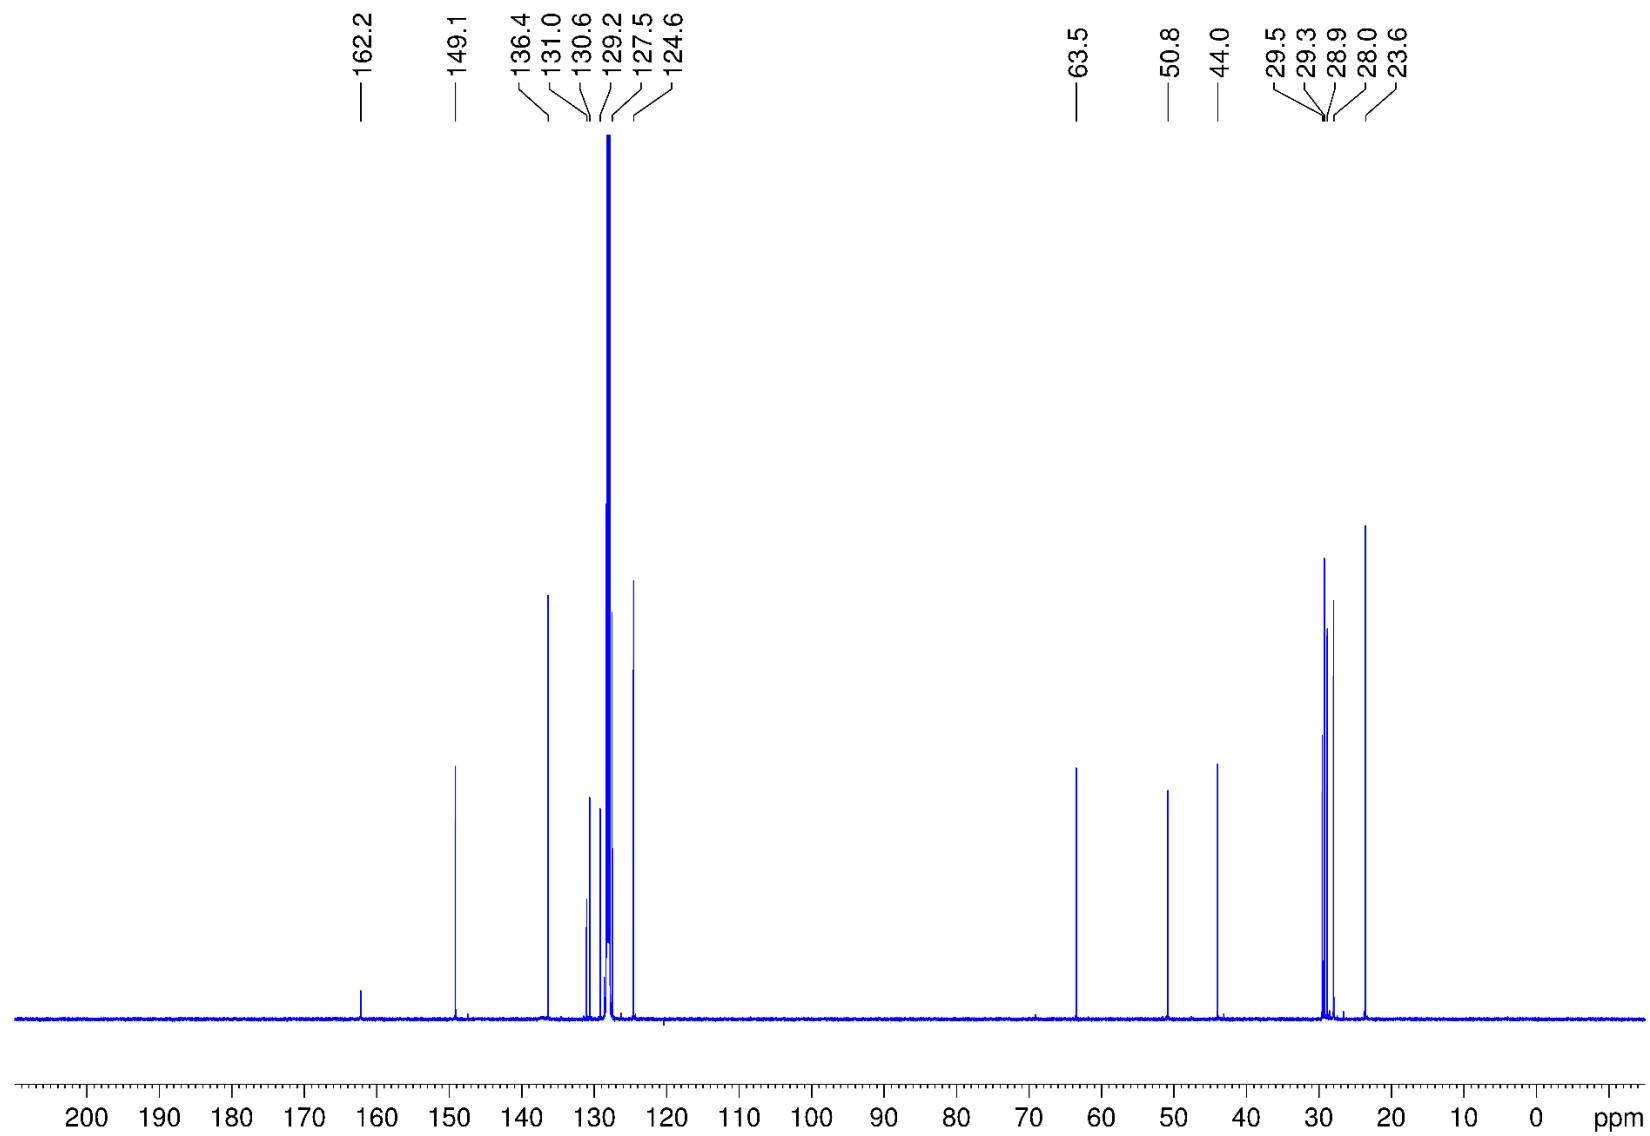

**Figure S17.**  $^{13}\text{C}\{^1\text{H}\}$  NMR spectrum of  $2^{\text{Br}}\text{-Ph}$  in  $\text{C}_6\text{D}_6$ .

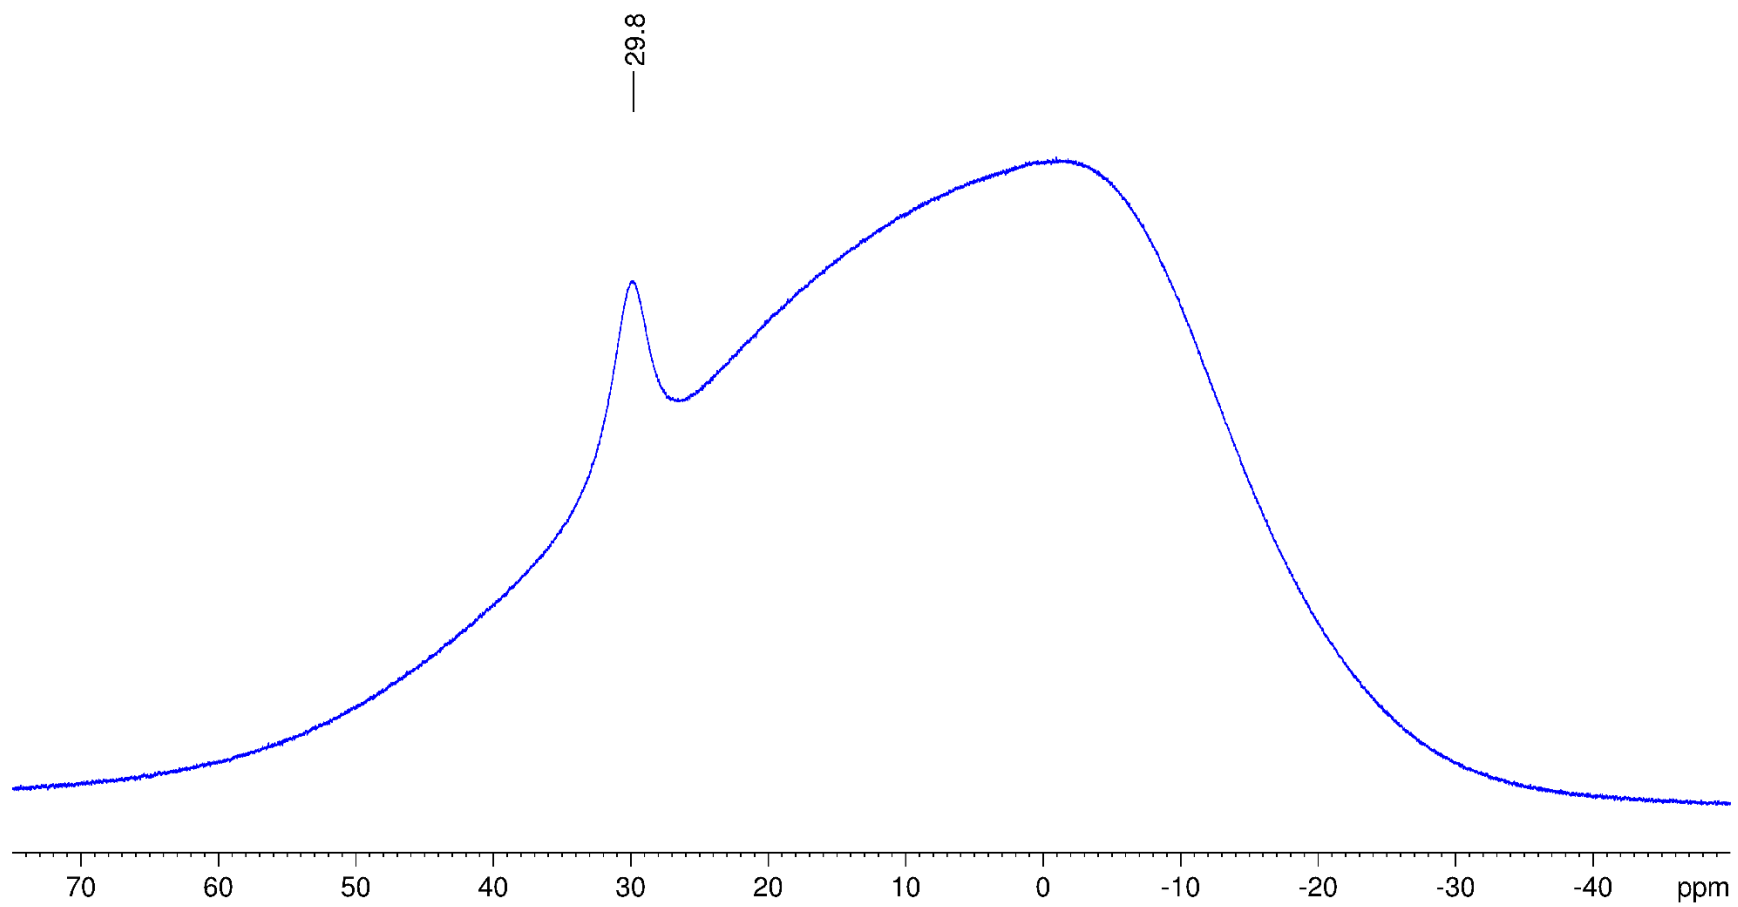

**Figure S18.**  $^{11}\text{B}$  NMR spectrum of  $2^{\text{Br}}\text{-Ph}$  in  $\text{C}_6\text{D}_6$ .

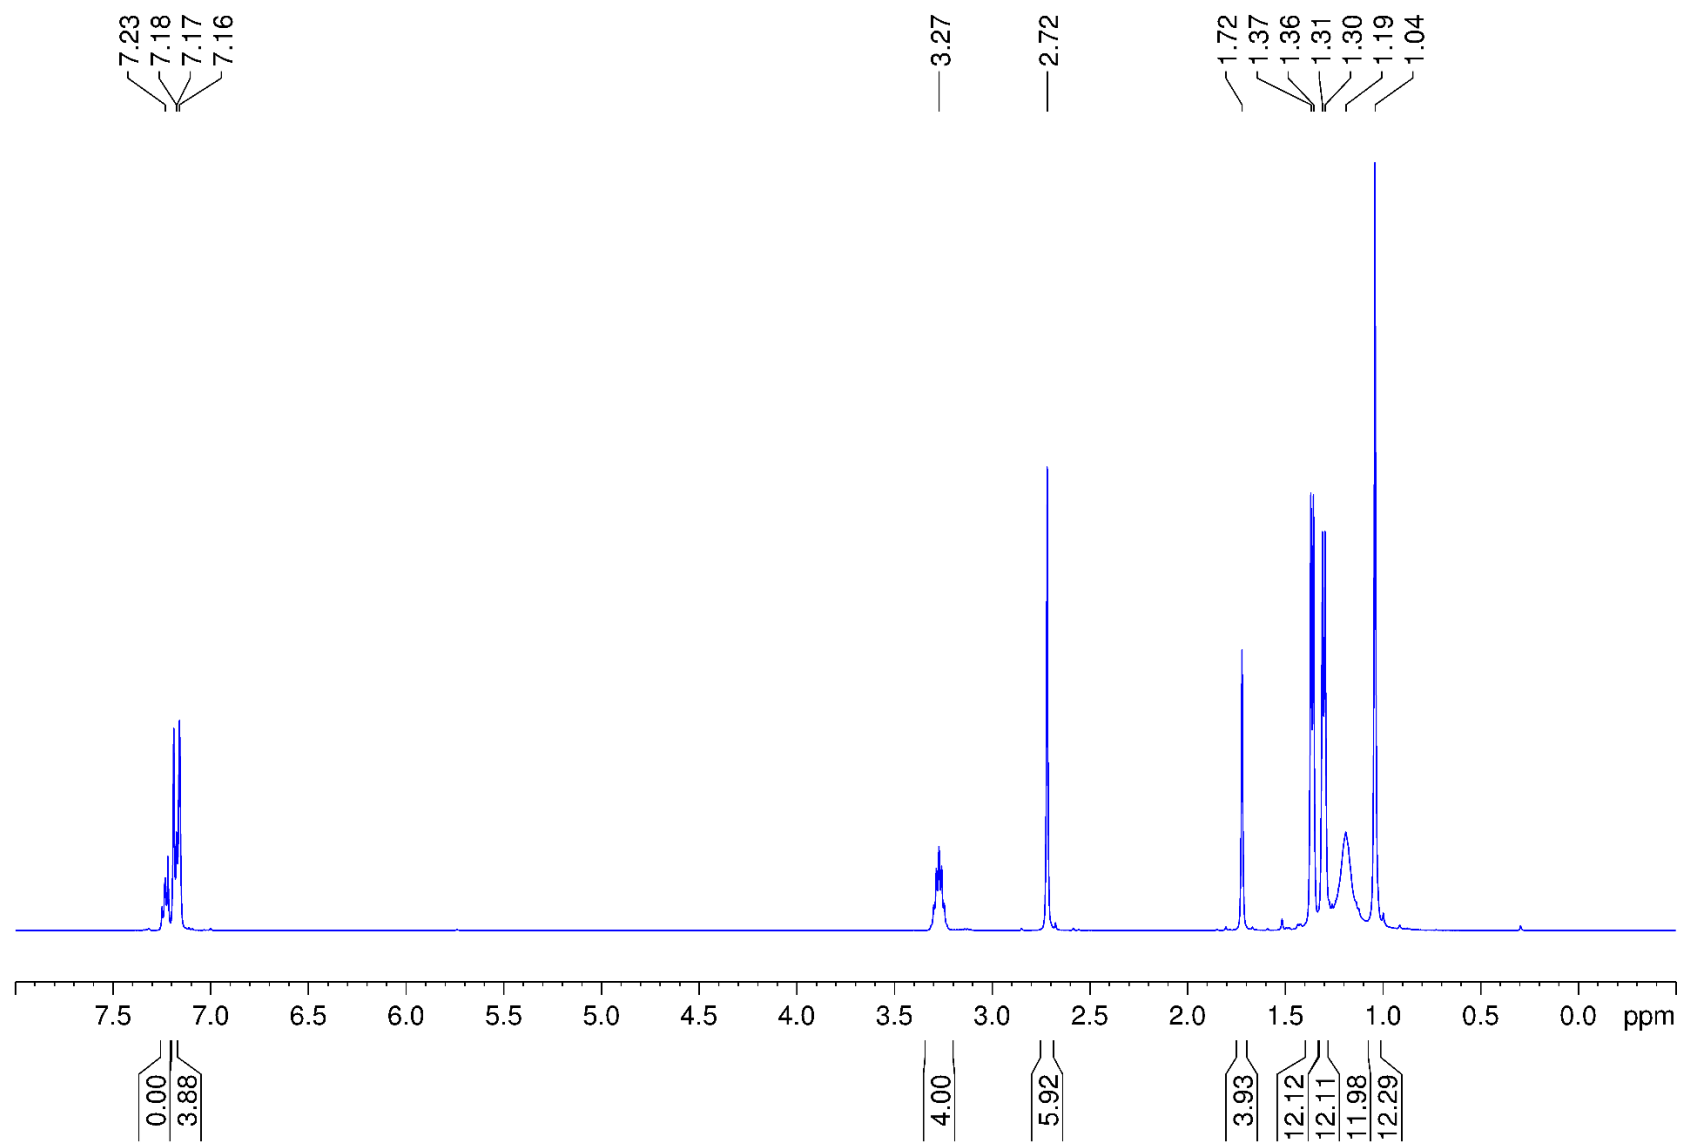

**Figure S19.**  $^1\text{H}\{^{11}\text{B}\}$  NMR spectrum of 3-NMe<sub>2</sub> in C<sub>6</sub>D<sub>6</sub>.

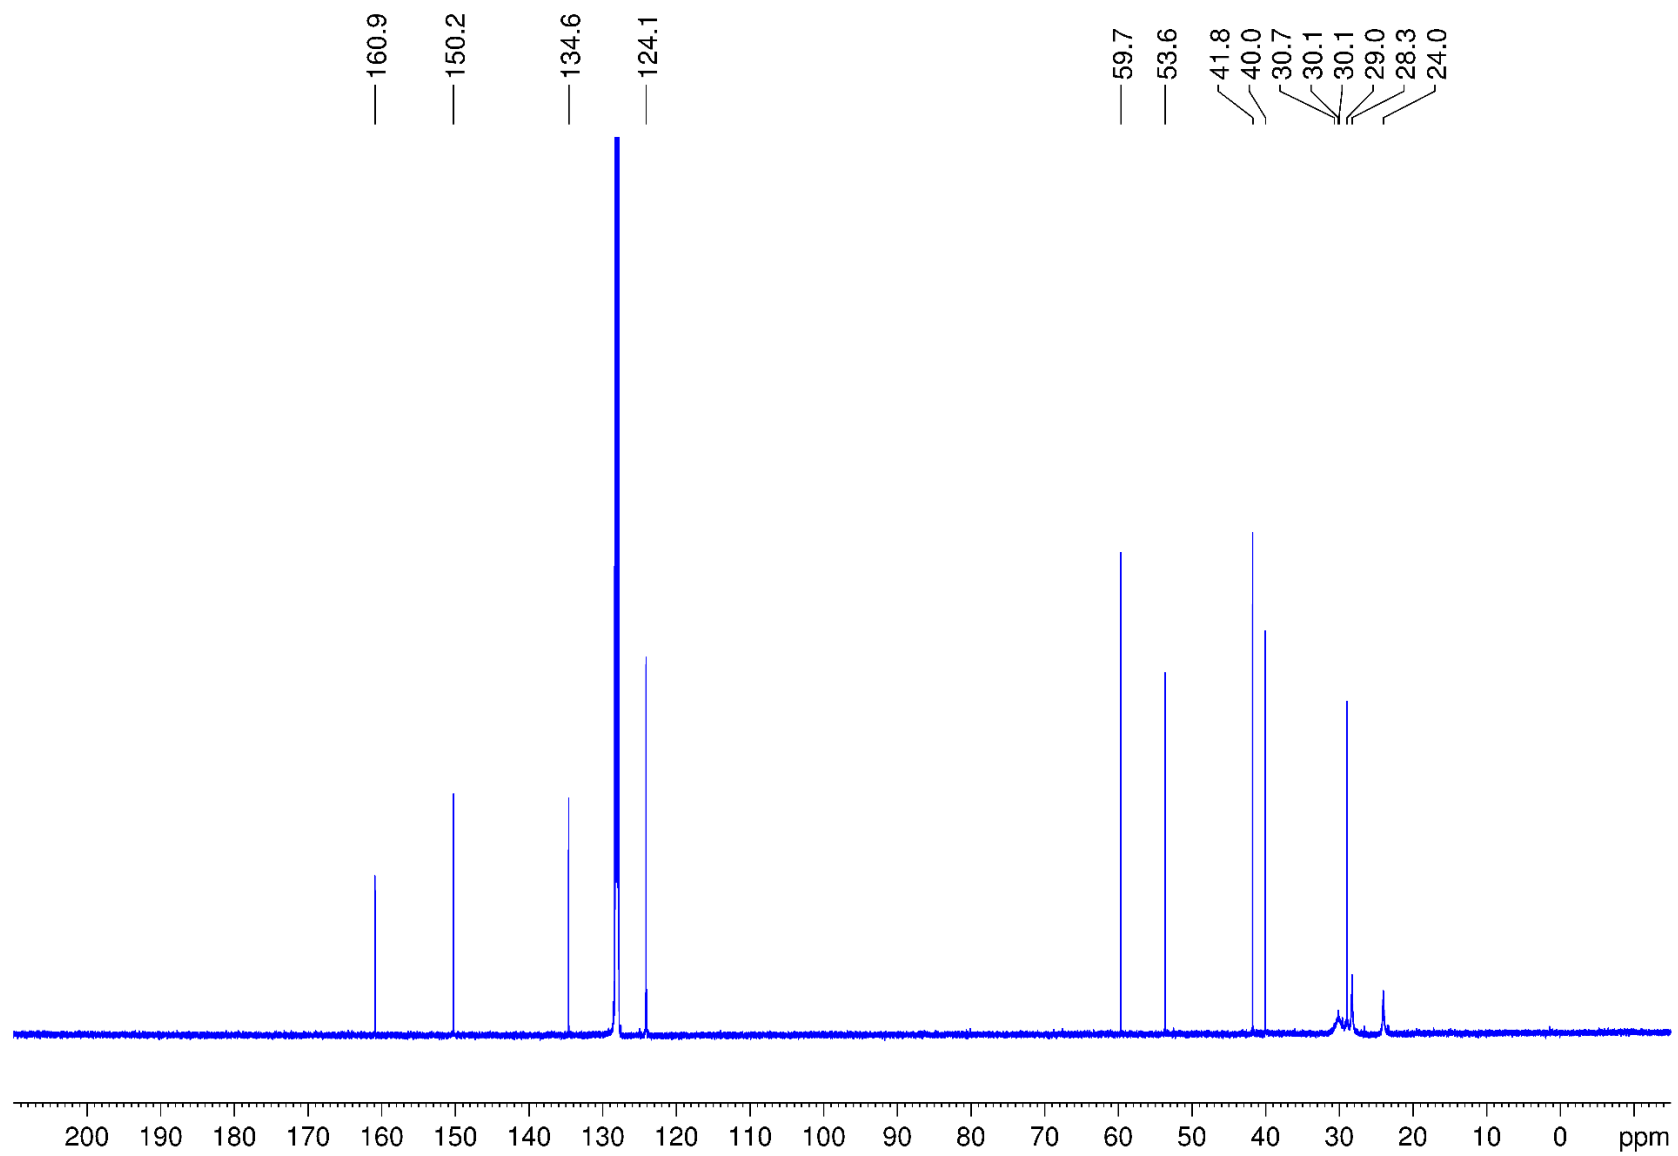

**Figure S20.**  $^{13}\text{C}\{^1\text{H}\}$  NMR spectrum of **3-NMe<sub>2</sub>** in C<sub>6</sub>D<sub>6</sub>.

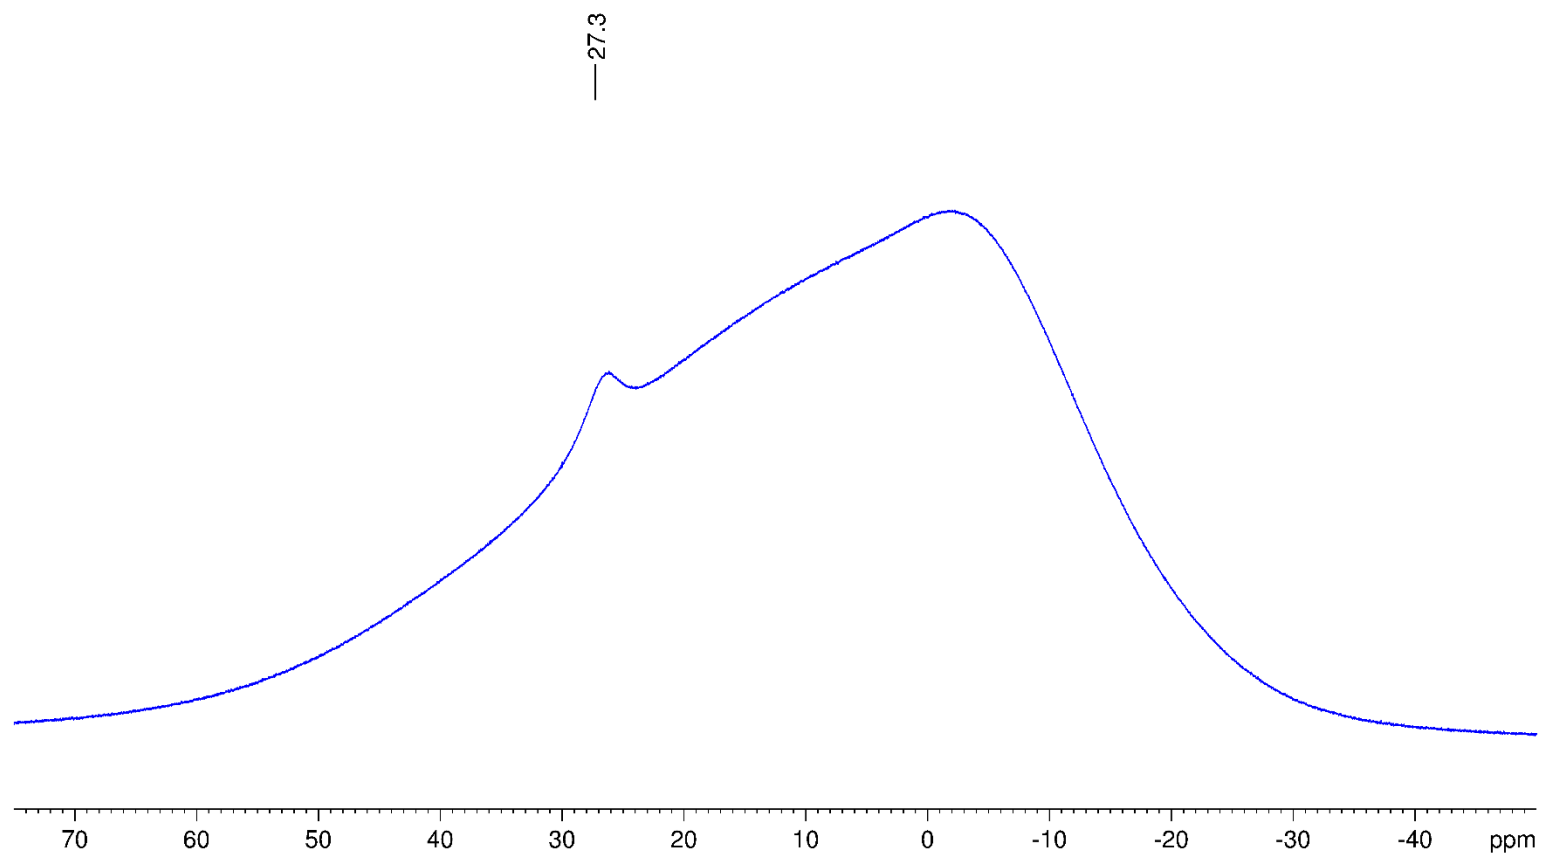

**Figure S21.**  $^{11}\text{B}$  NMR spectrum of 3-NMe<sub>2</sub> in C<sub>6</sub>D<sub>6</sub>.

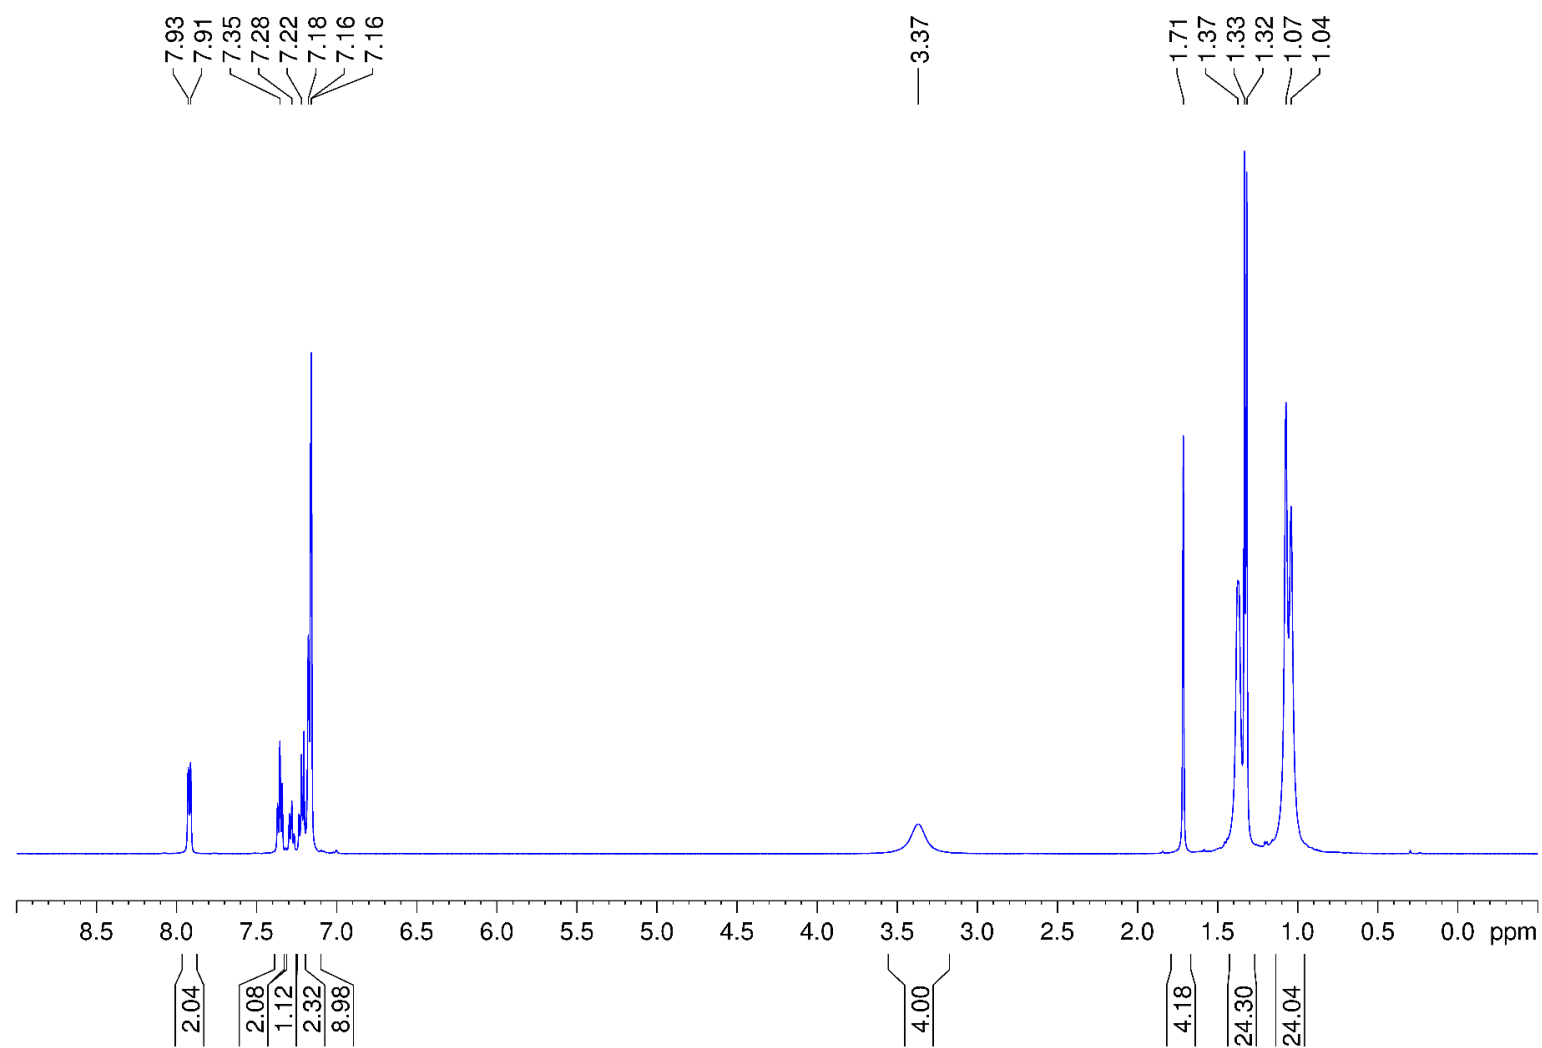

**Figure S22.**  $^1\text{H}\{^{11}\text{B}\}$  NMR spectrum of **3-Ph** in  $\text{C}_6\text{D}_6$ .



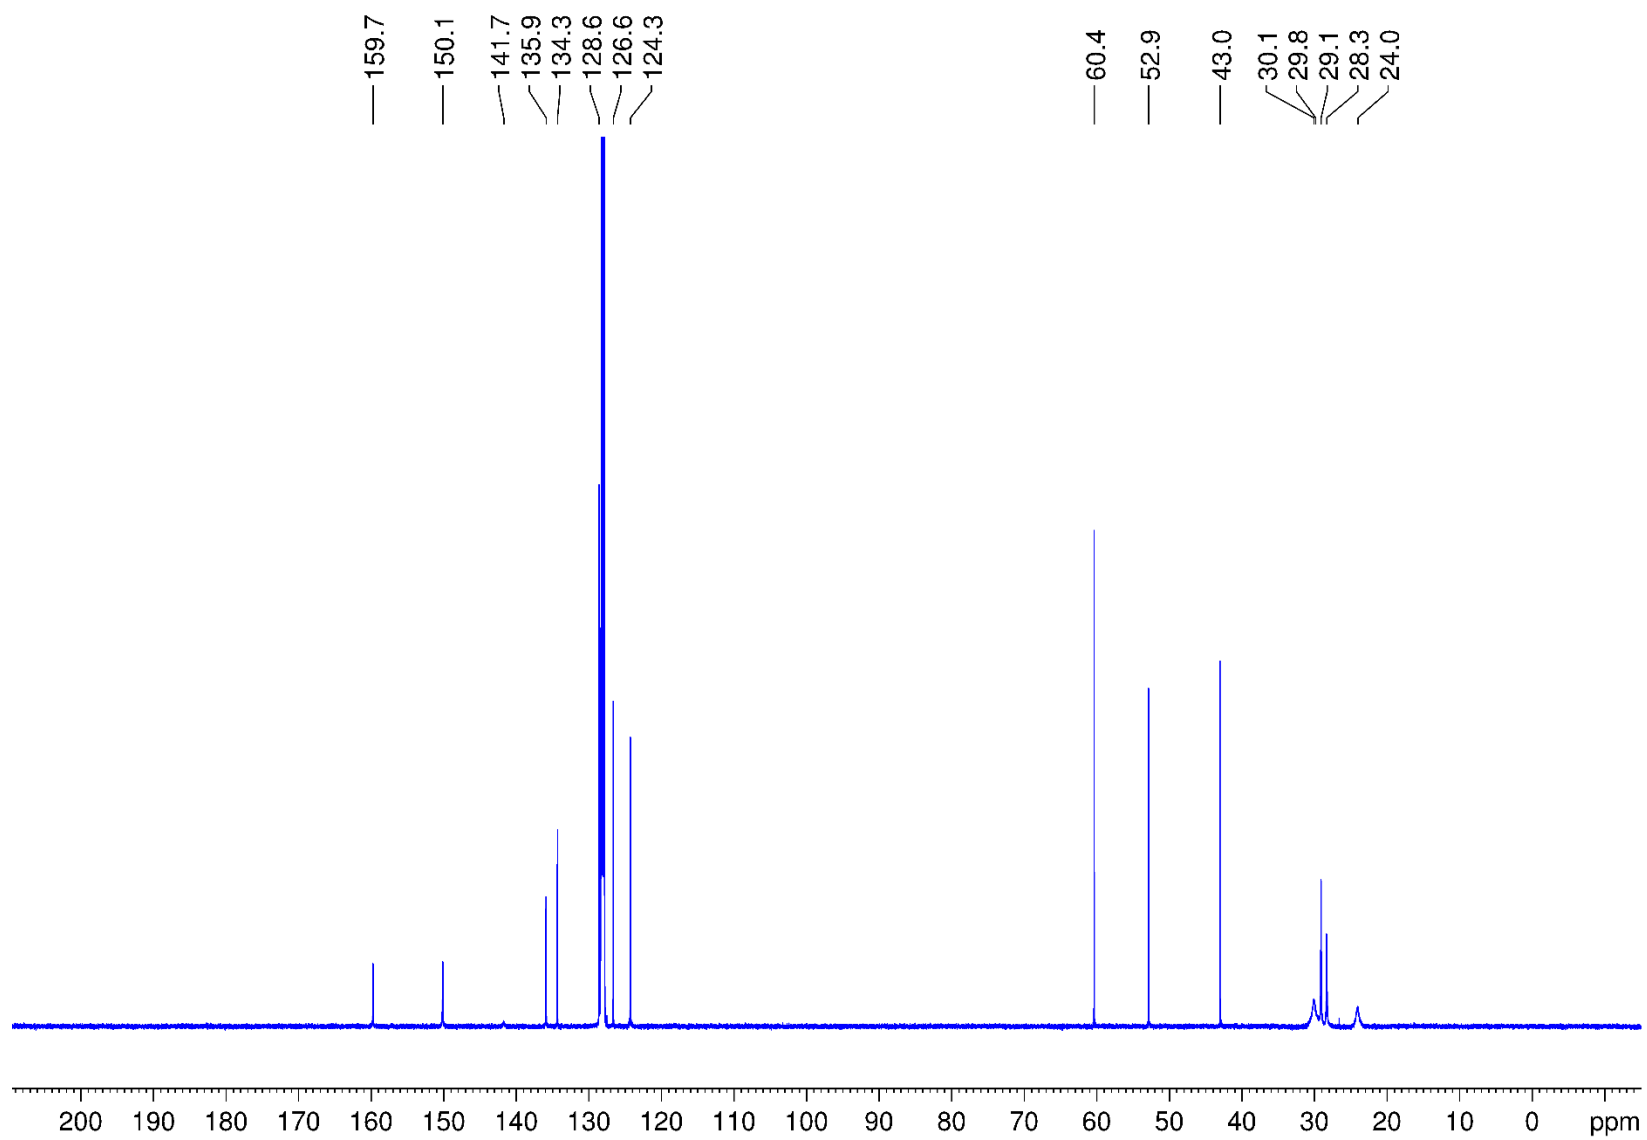

**Figure S23.**  $^{13}\text{C}\{^1\text{H}\}$  NMR spectrum of **3-Ph** in  $\text{C}_6\text{D}_6$ .

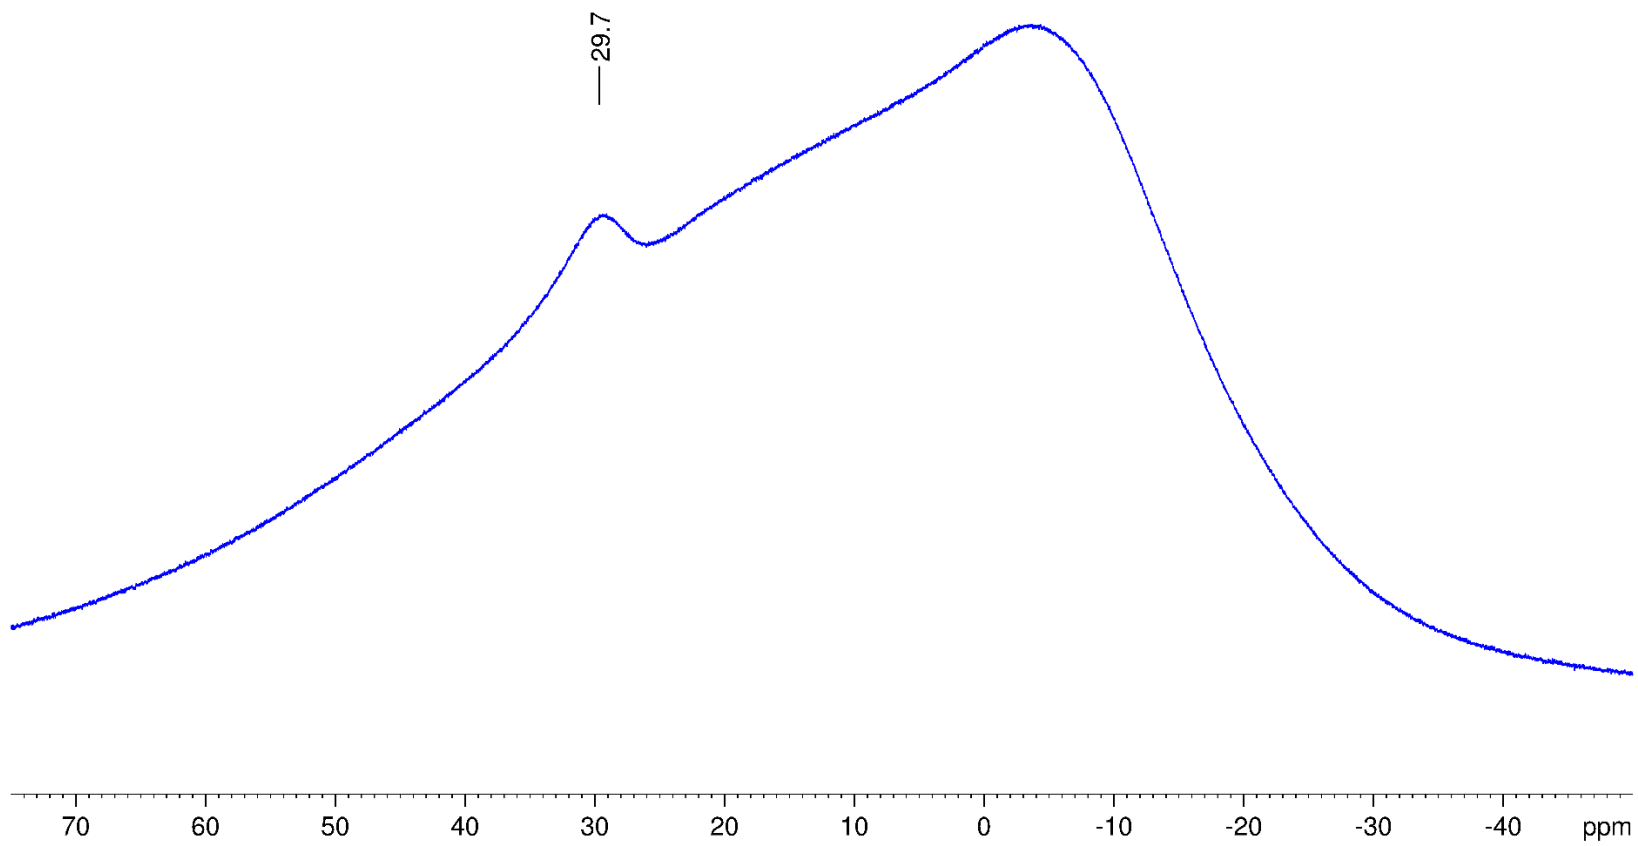

**Figure S24.**  $^{11}\text{B}$  NMR spectrum of **3-Ph** in  $\text{C}_6\text{D}_6$ .

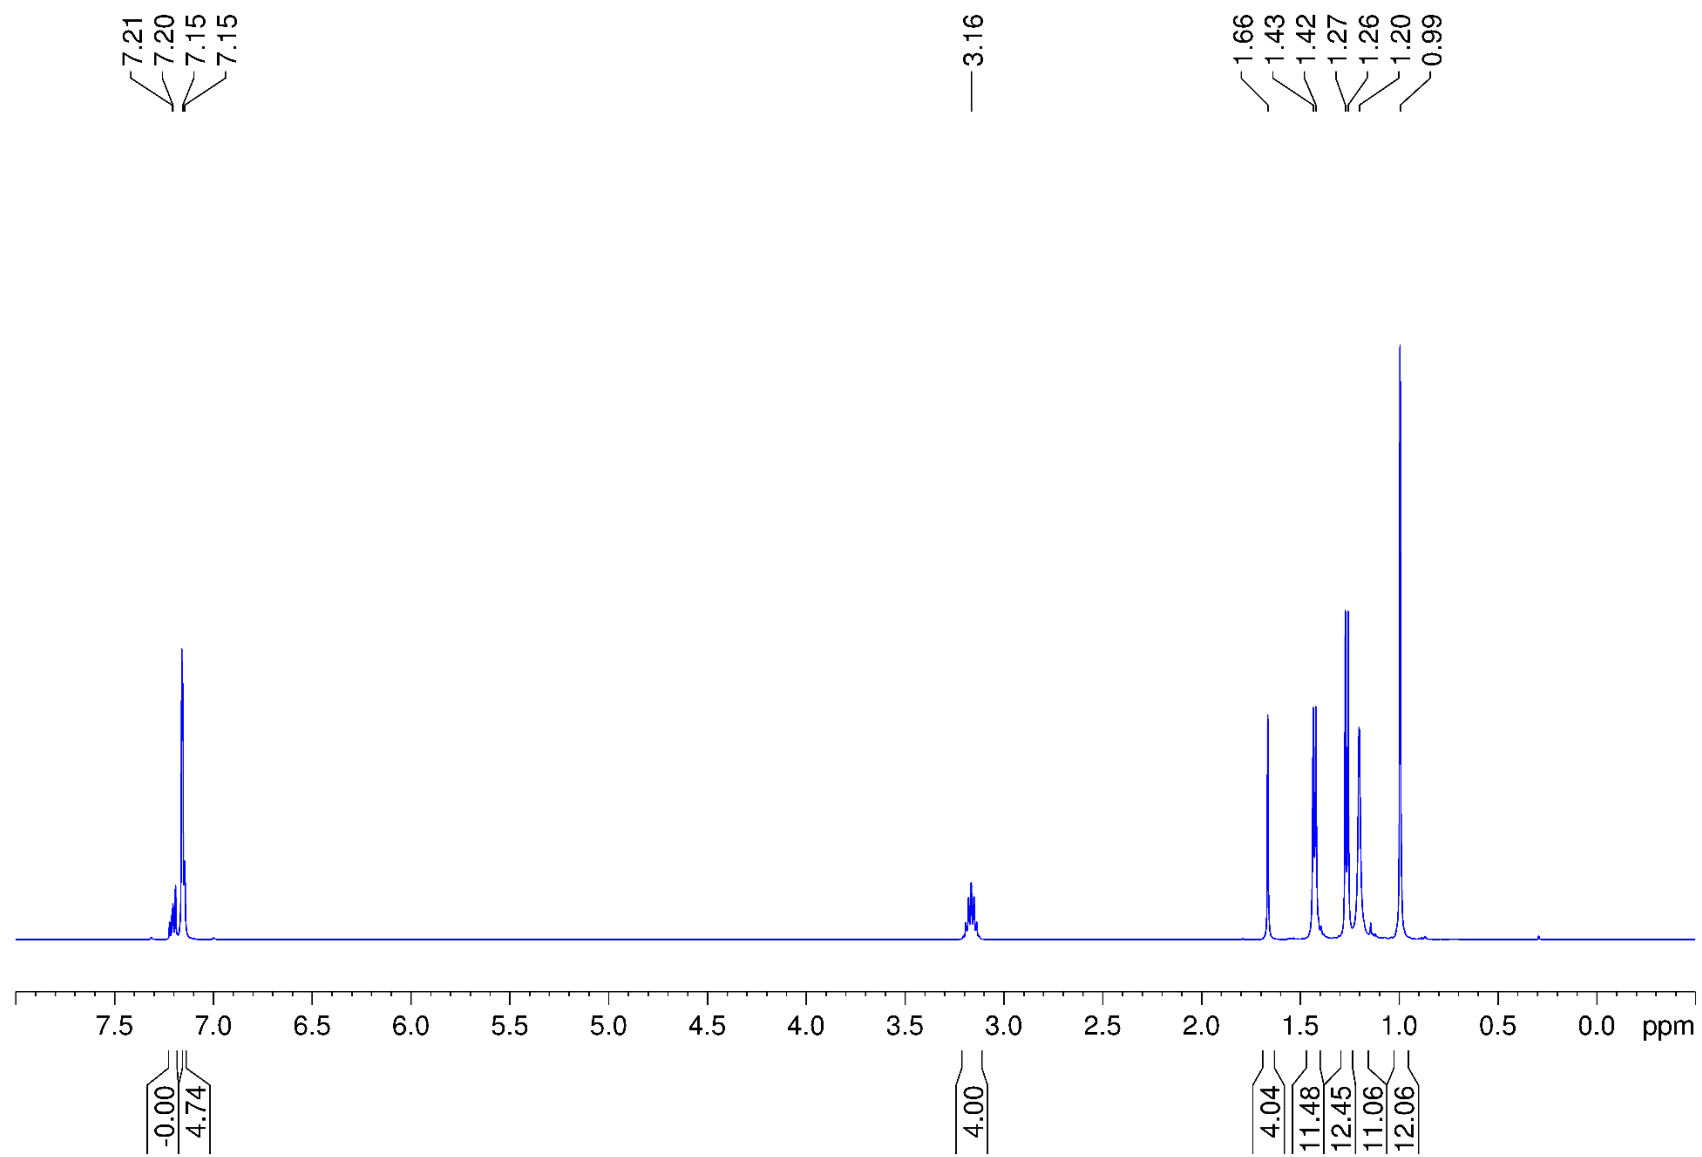

**Figure S25.**  $^1\text{H}\{^{11}\text{B}\}$  NMR spectrum of **3-Cl** in  $\text{C}_6\text{D}_6$ .

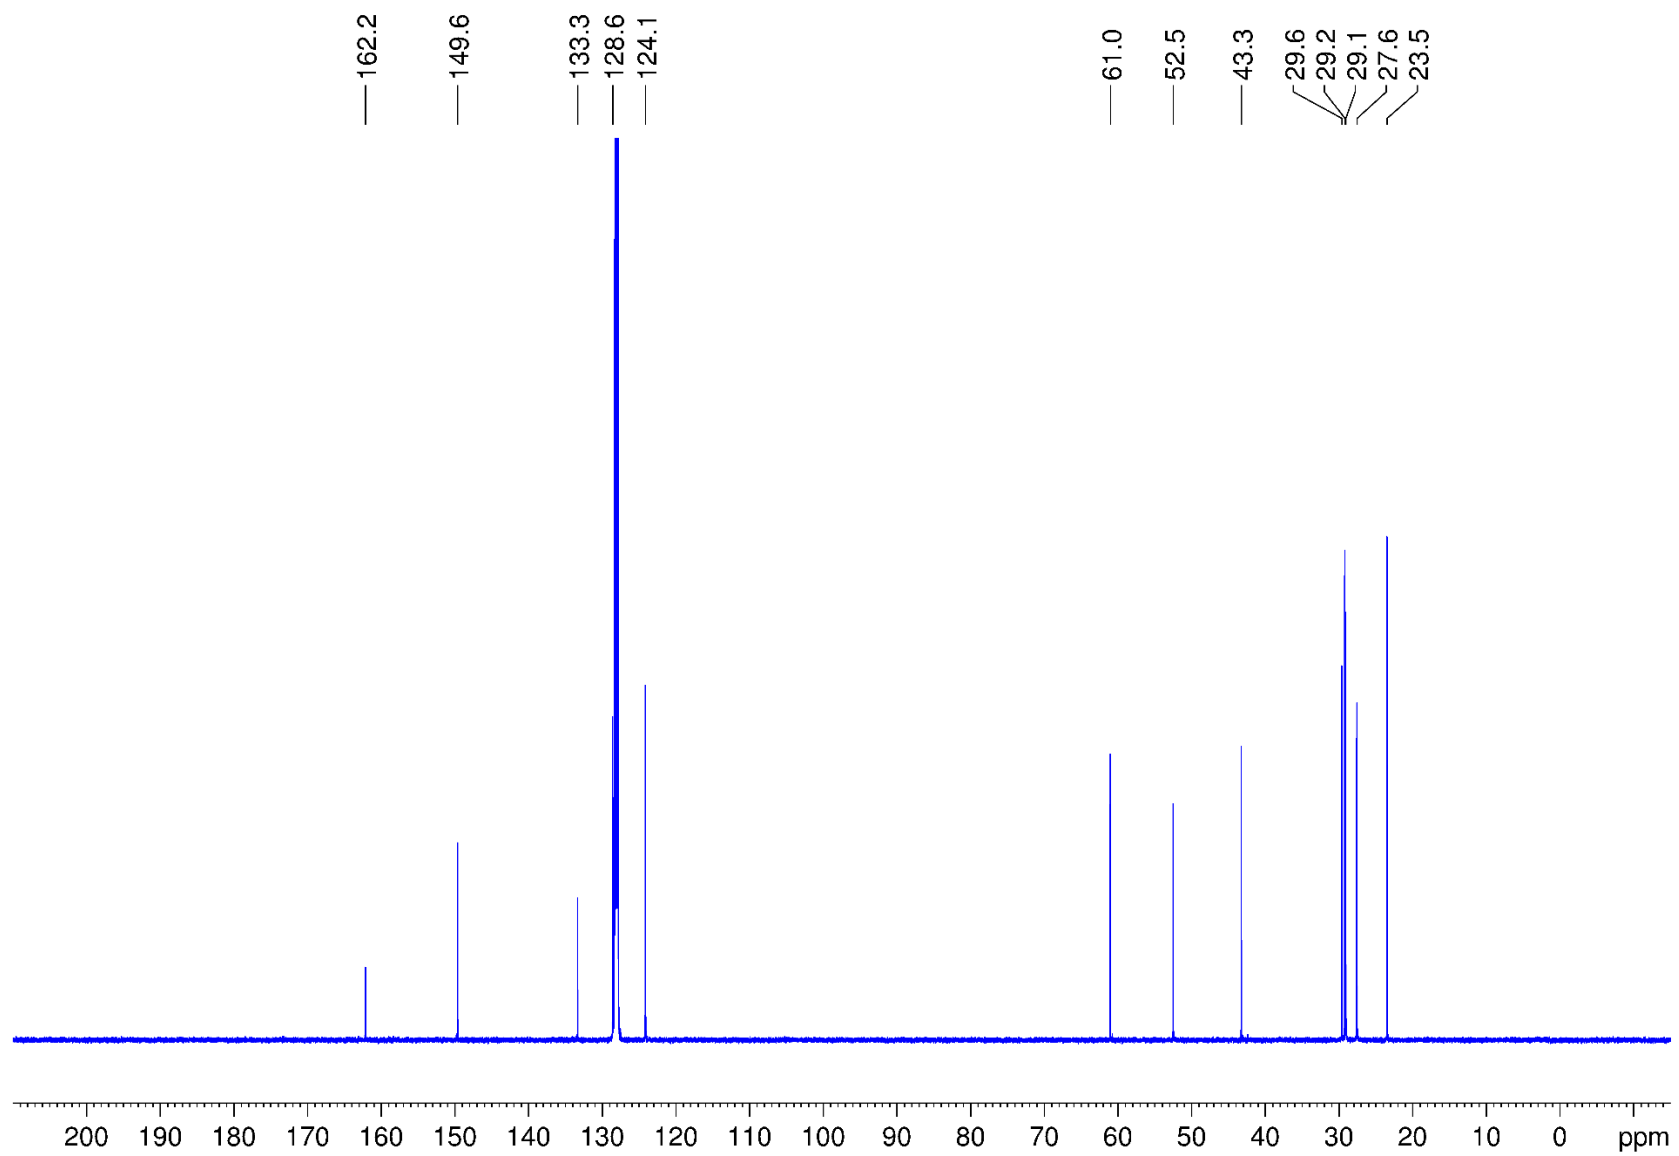

**Figure S26.**  $\{^1\text{H}\}$  NMR spectrum of **3-Cl** in  $\text{C}_6\text{D}_6$ .

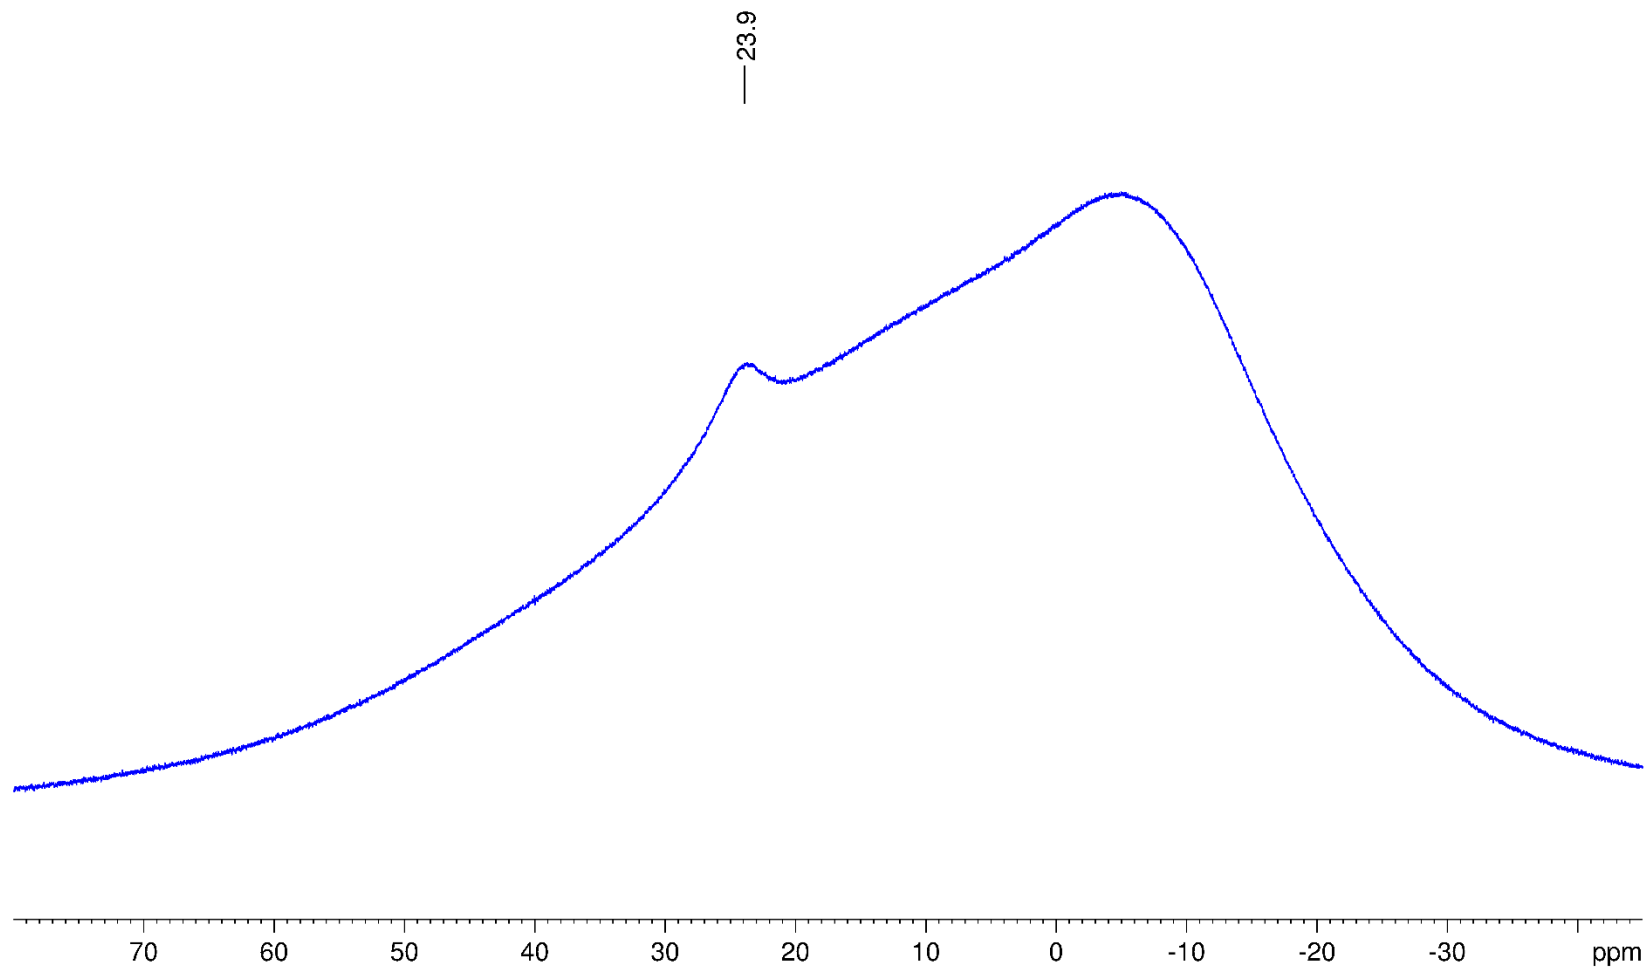

**Figure S27.**  $^{11}\text{B}$  NMR spectrum of **3-Cl** in  $\text{C}_6\text{D}_6$ .

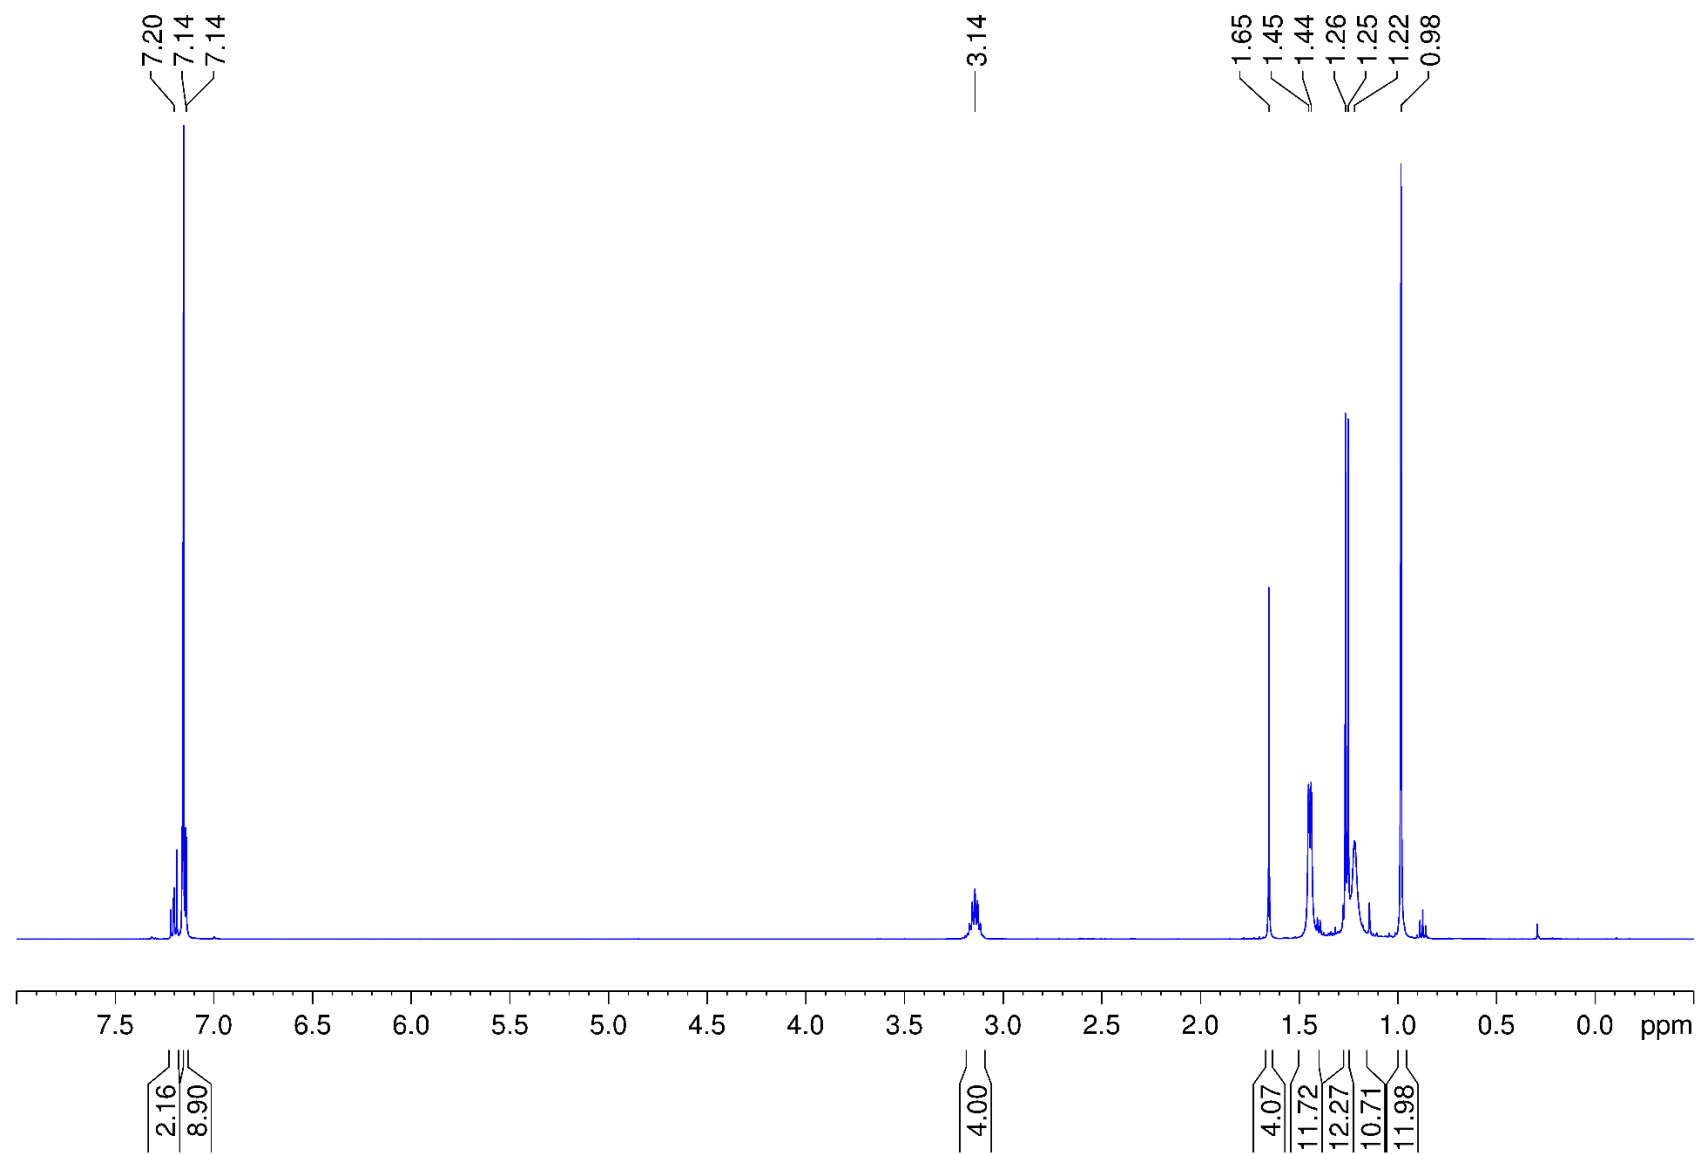

**Figure S28.**  $^1\text{H}\{^{11}\text{B}\}$  NMR spectrum of **3-Br** in  $\text{C}_6\text{D}_6$ .

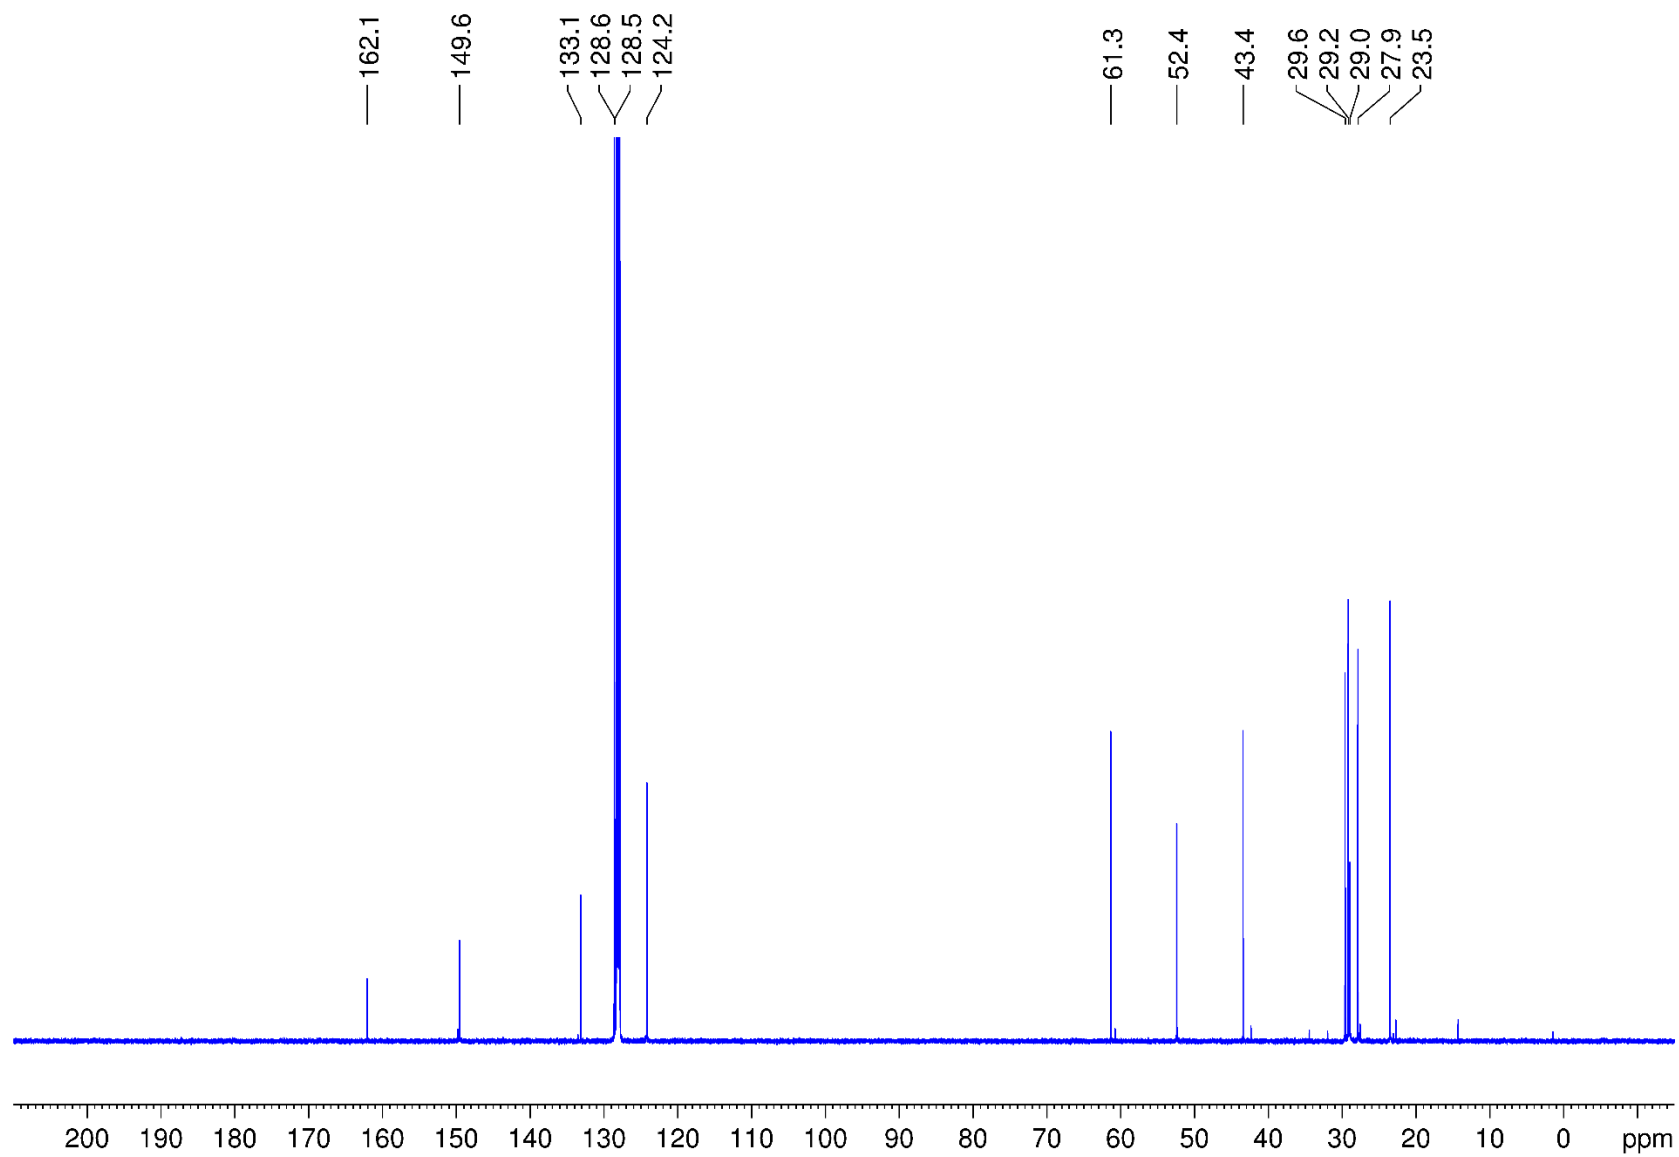

**Figure S29.**  $^{13}\text{C}\{^1\text{H}\}$  NMR spectrum of **3-Br** in  $\text{C}_6\text{D}_6$ .

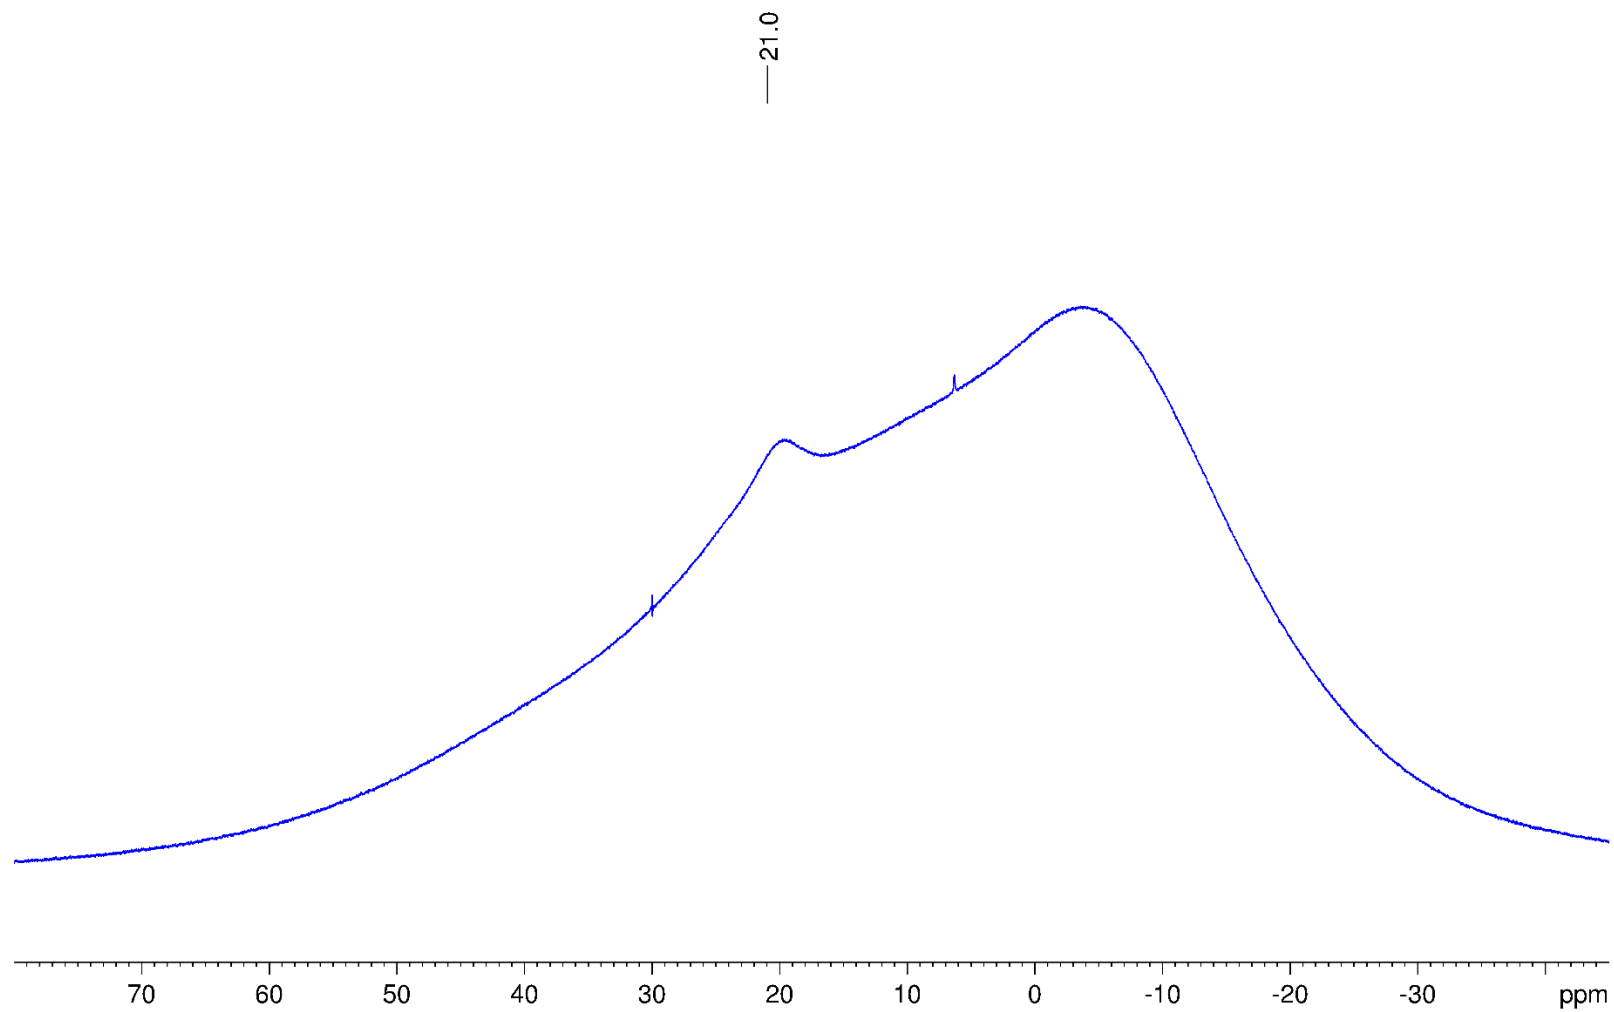

**Figure S30.**  $^{11}\text{B}$  NMR spectrum of **3-Br** in  $\text{C}_6\text{D}_6$ .



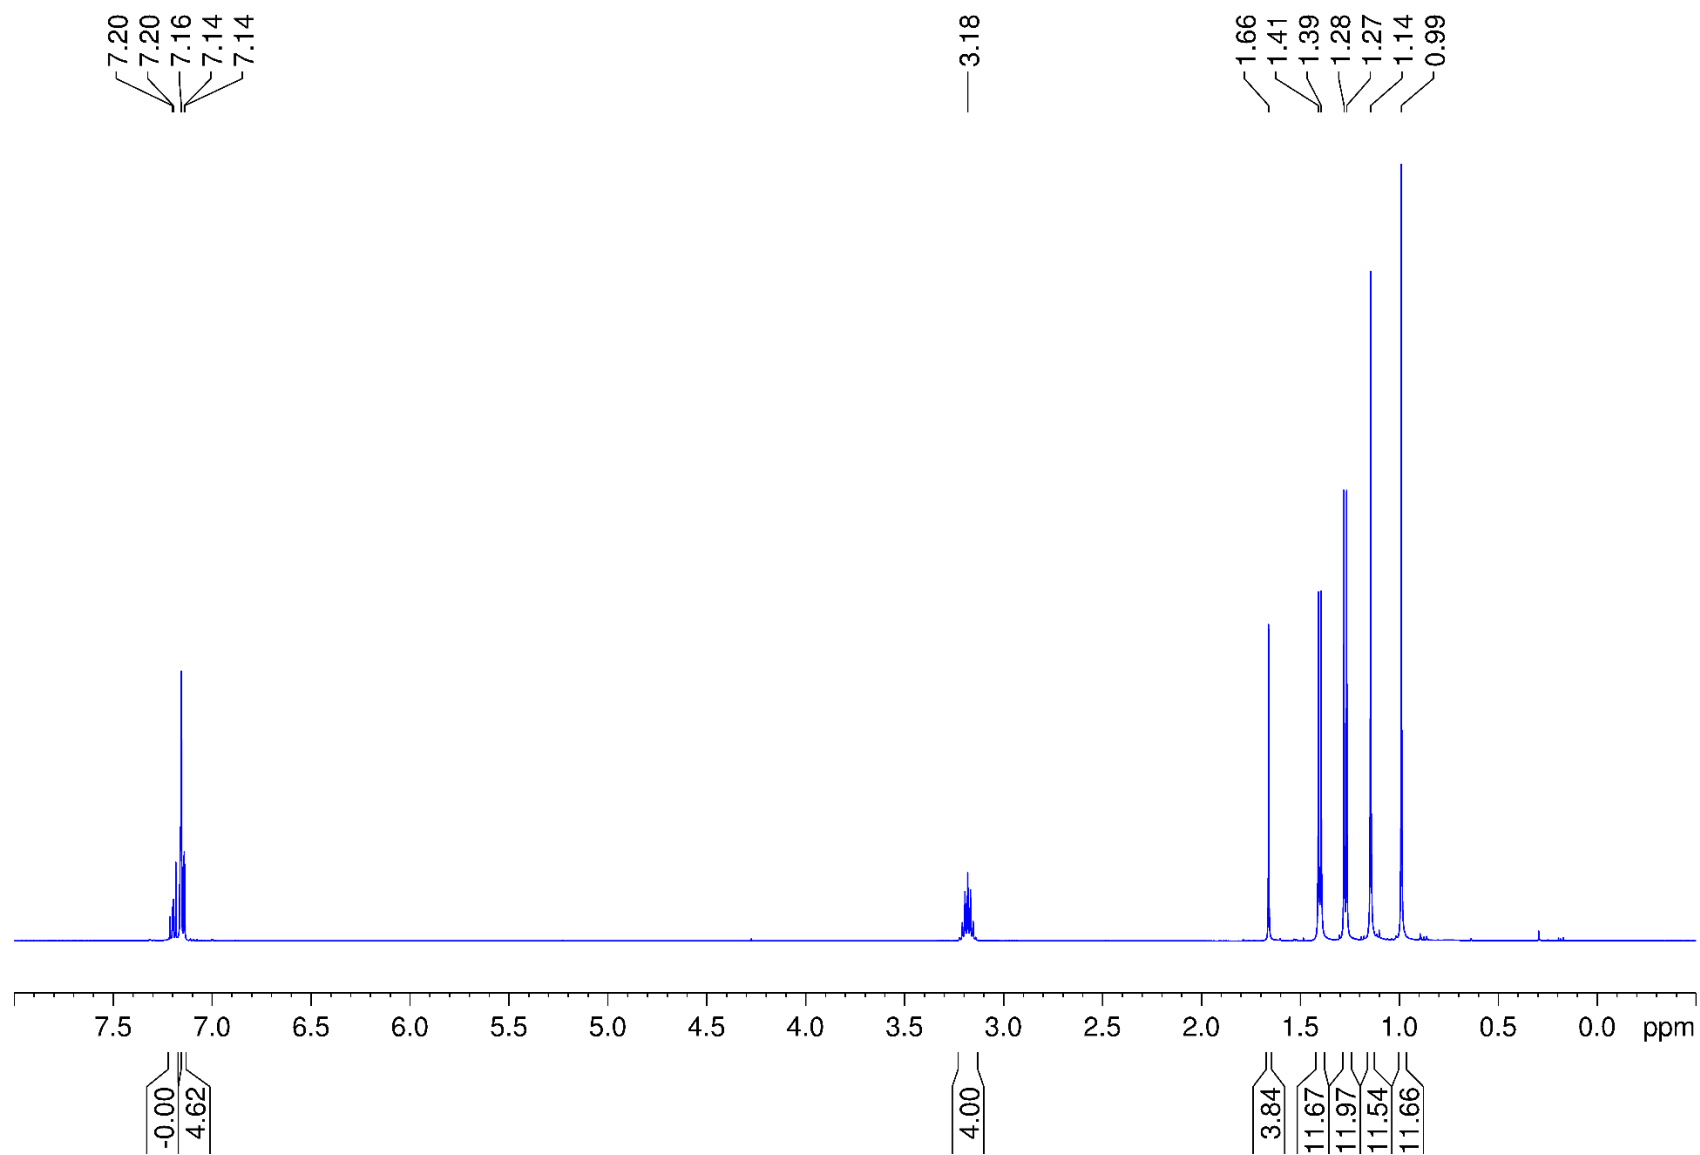

**Figure S31.**  $^1\text{H}\{^{11}\text{B}\}$  NMR spectrum of **3-N<sub>3</sub>** in  $\text{C}_6\text{D}_6$ .

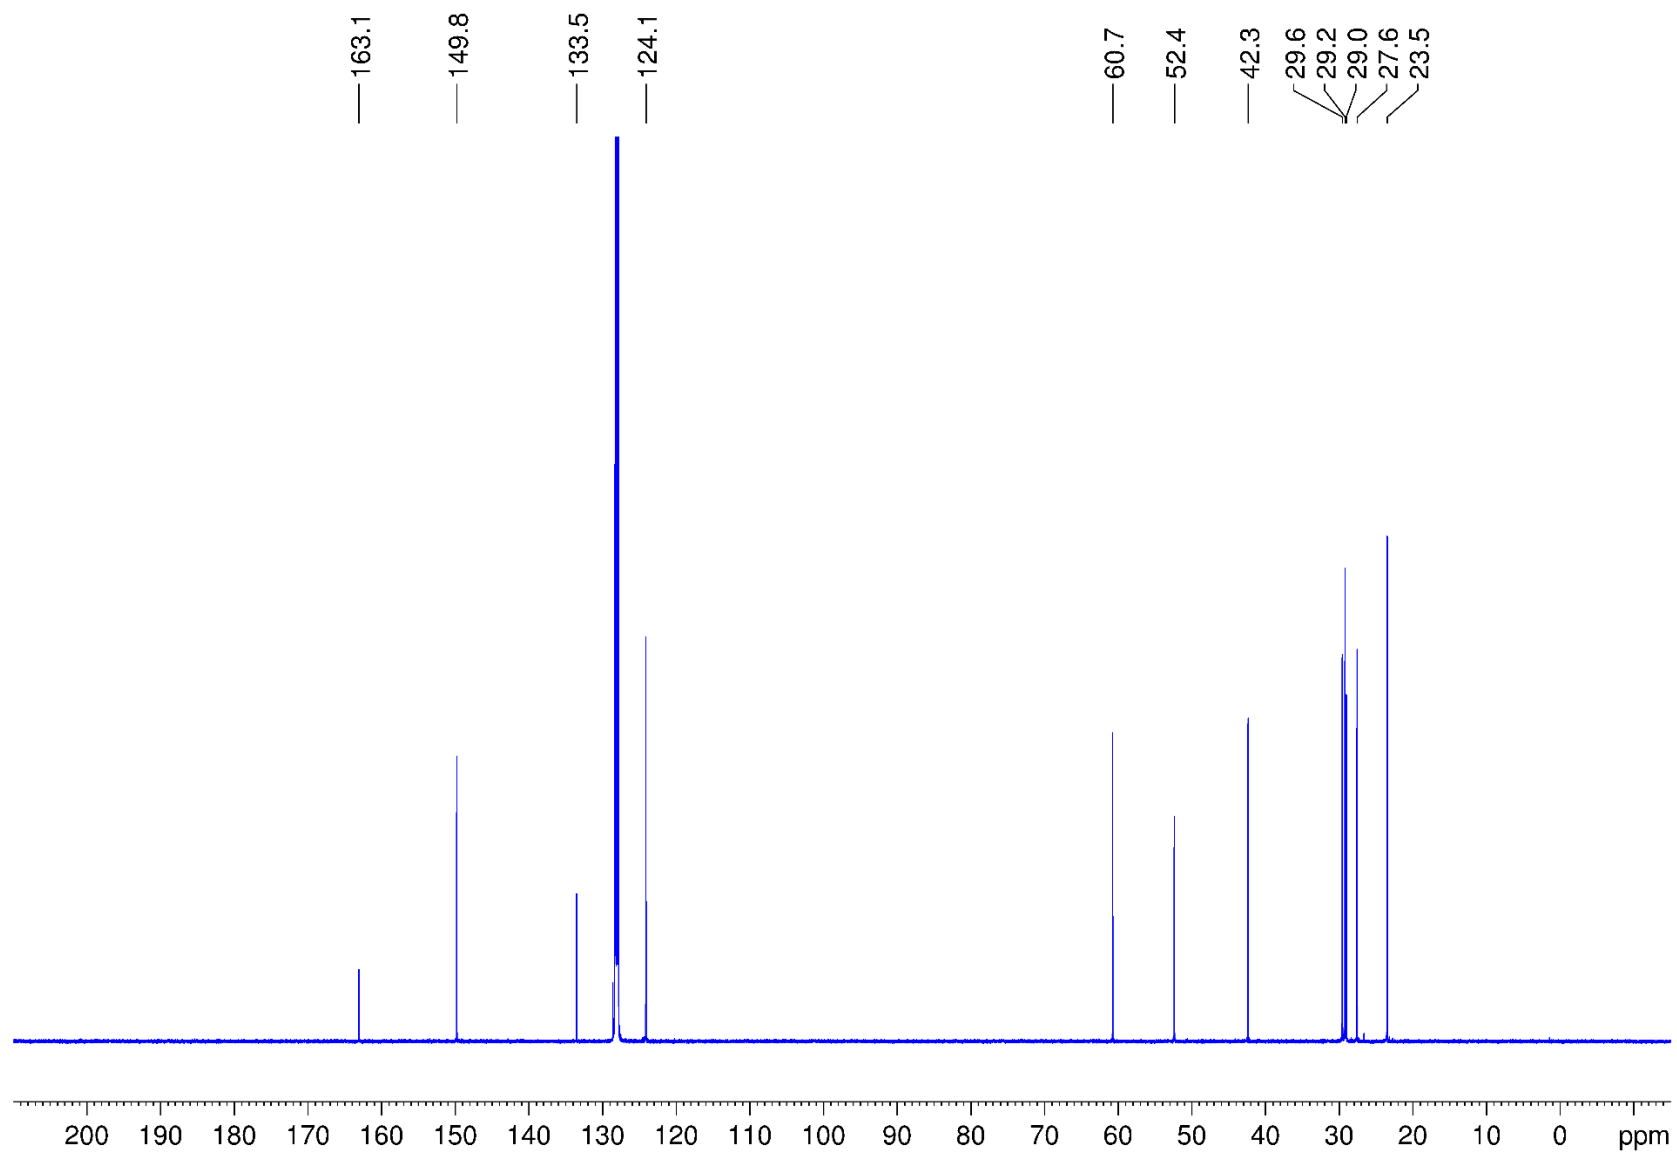

**Figure S32.**  $^{13}\text{C}\{^1\text{H}\}$  NMR spectrum of 3-N<sub>3</sub> in C<sub>6</sub>D<sub>6</sub>.

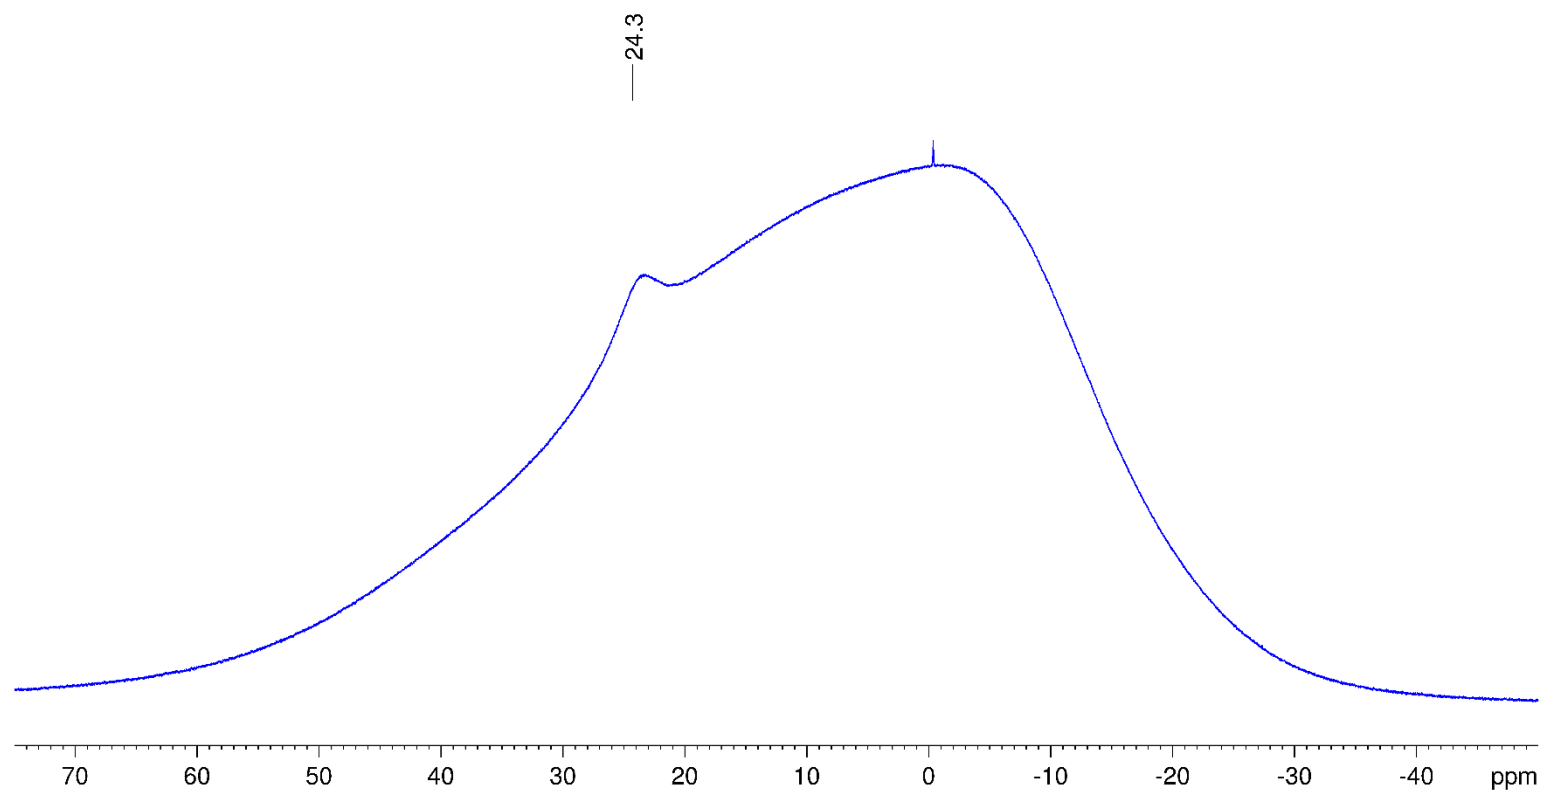

**Figure S33.**  $^{11}\text{B}$  NMR spectrum of  $3\text{-N}_3$  in  $\text{C}_6\text{D}_6$ .

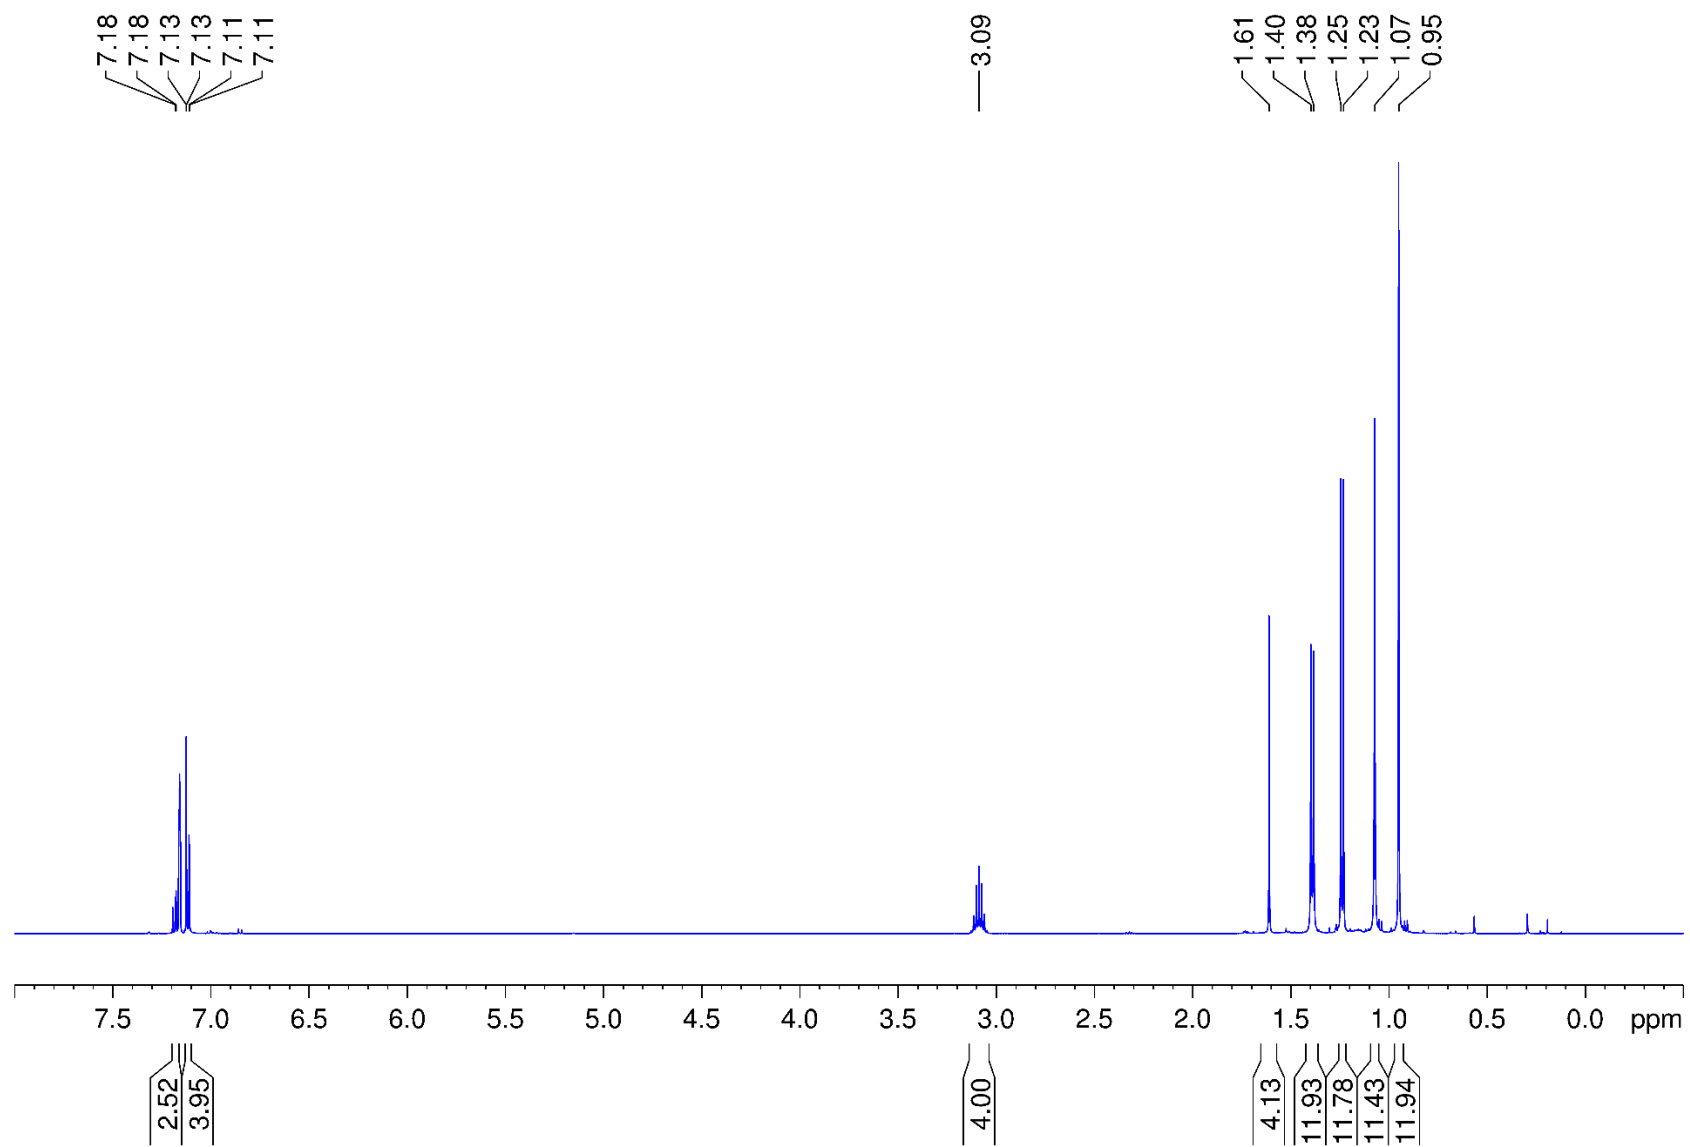

**Figure S34.**  $^1\text{H}\{^{11}\text{B}\}$  NMR spectrum of 3-NCS in  $\text{C}_6\text{D}_6$ .

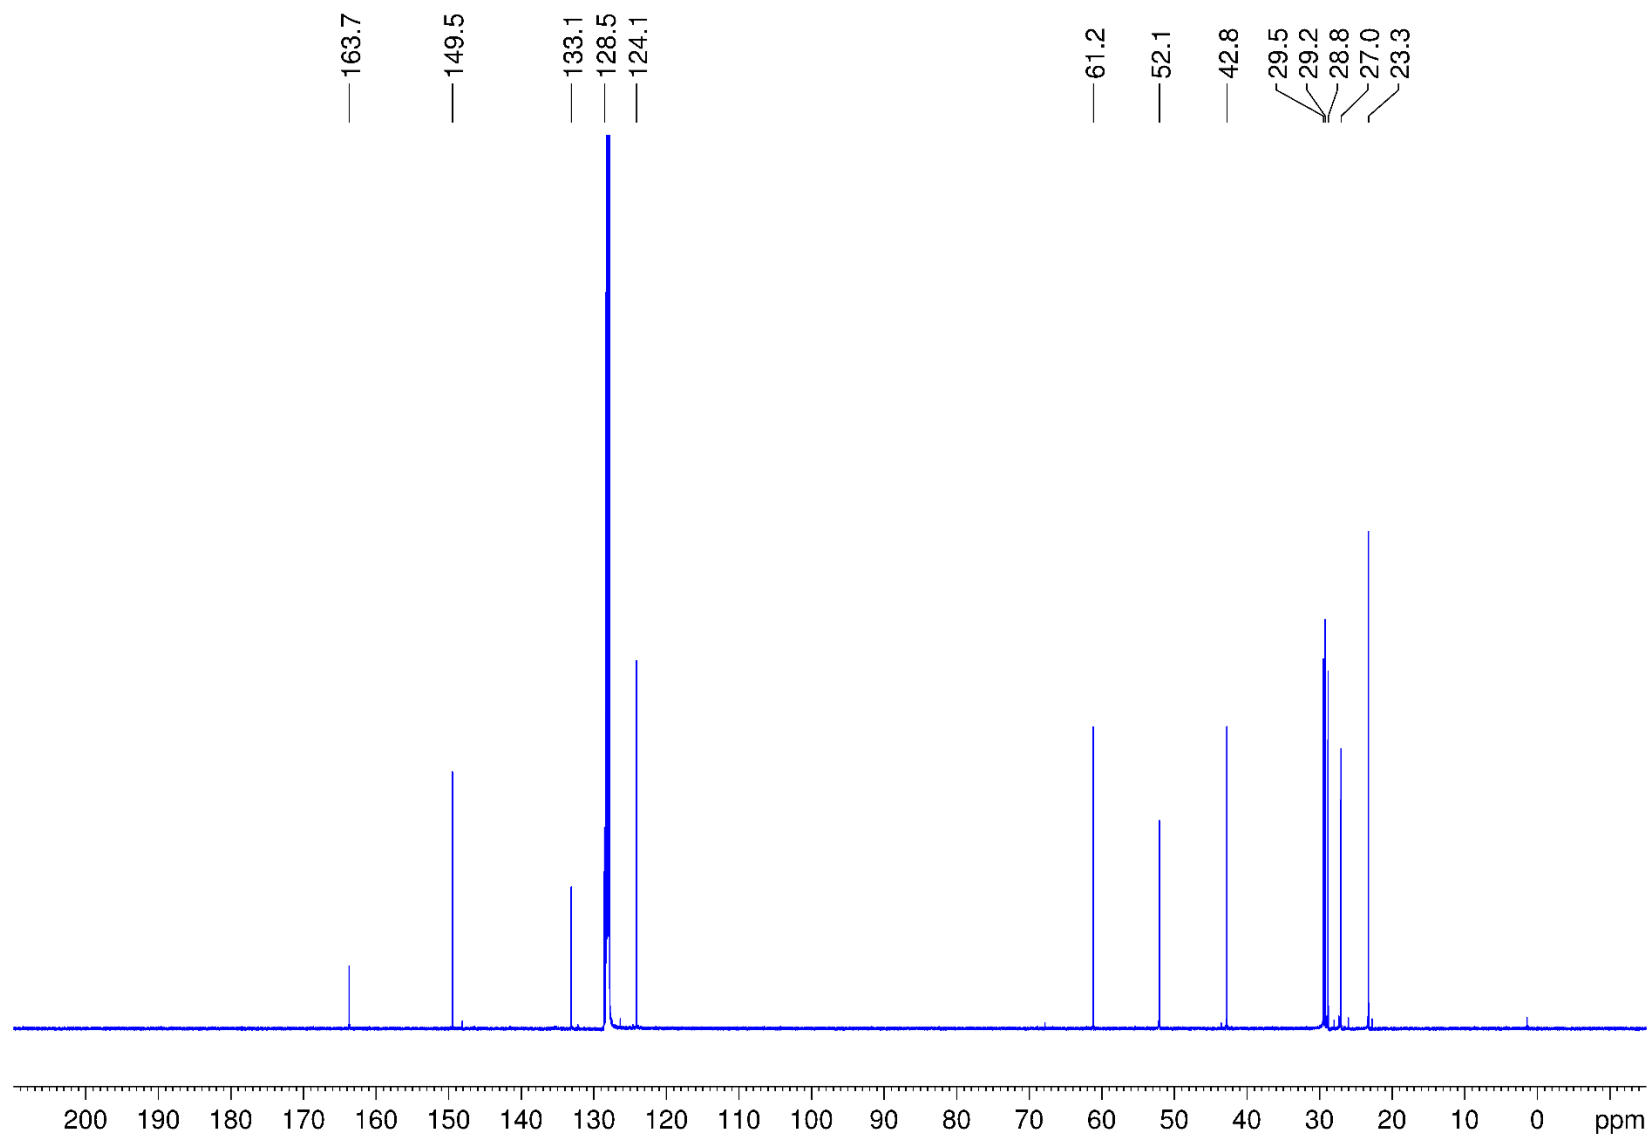

**Figure S35.**  $^{13}\text{C}\{^1\text{H}\}$  NMR spectrum of **3-NCS** in  $\text{C}_6\text{D}_6$ .

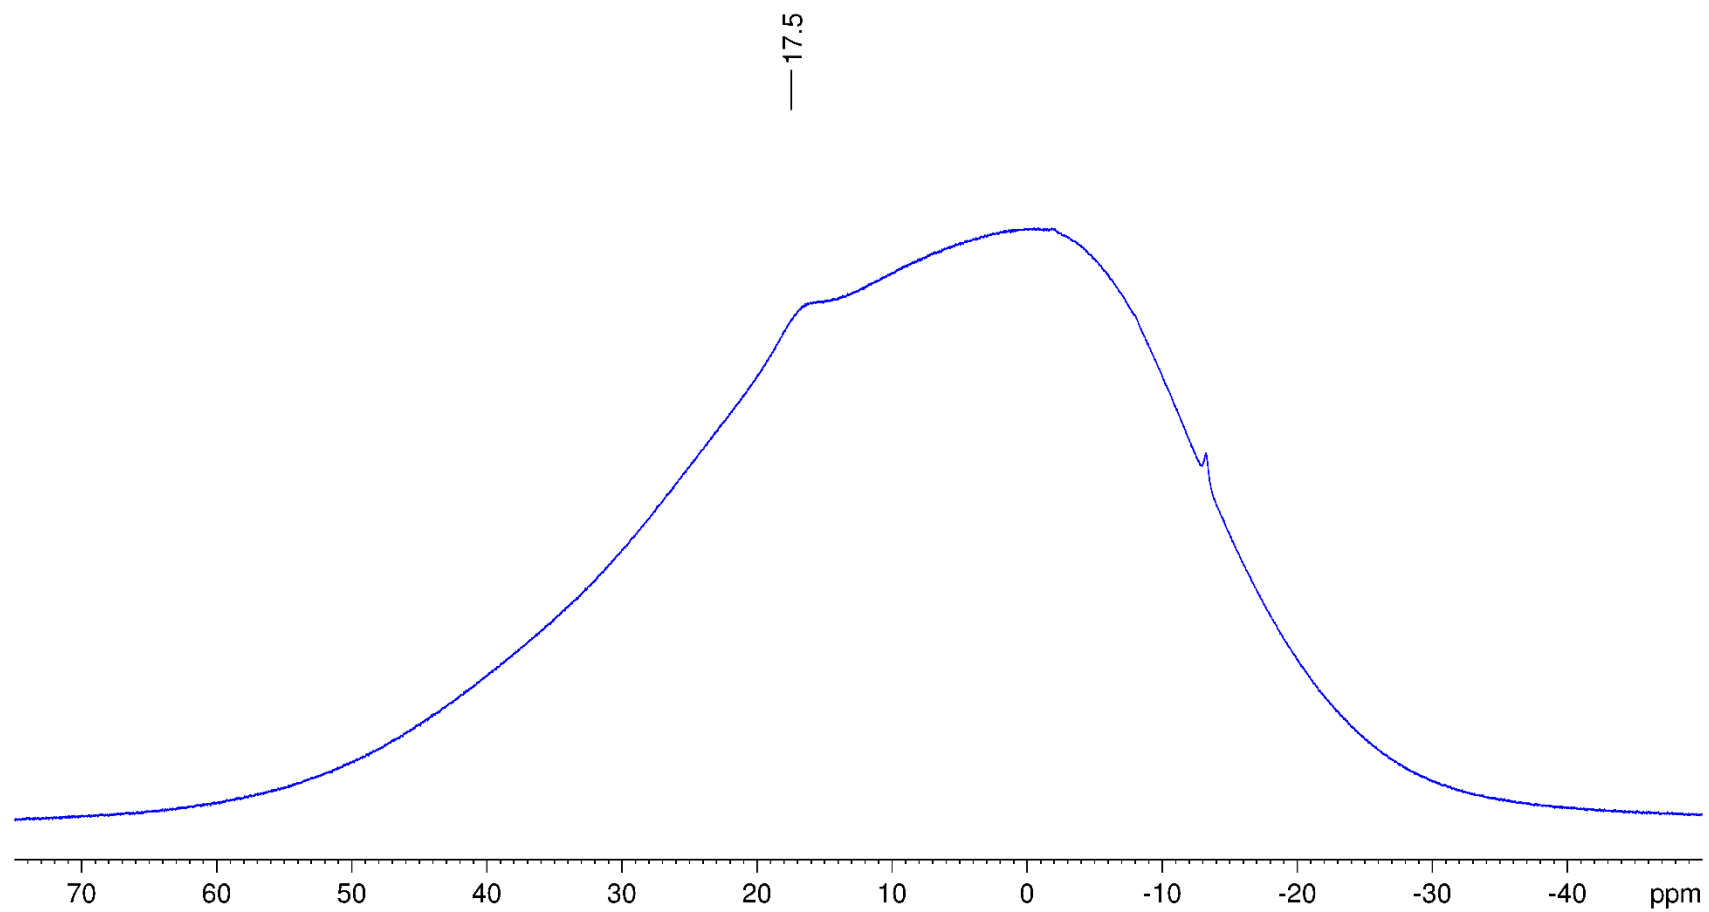

**Figure S36.**  $^{11}\text{B}$  NMR spectrum of 3-NCS in  $\text{C}_6\text{D}_6$ .

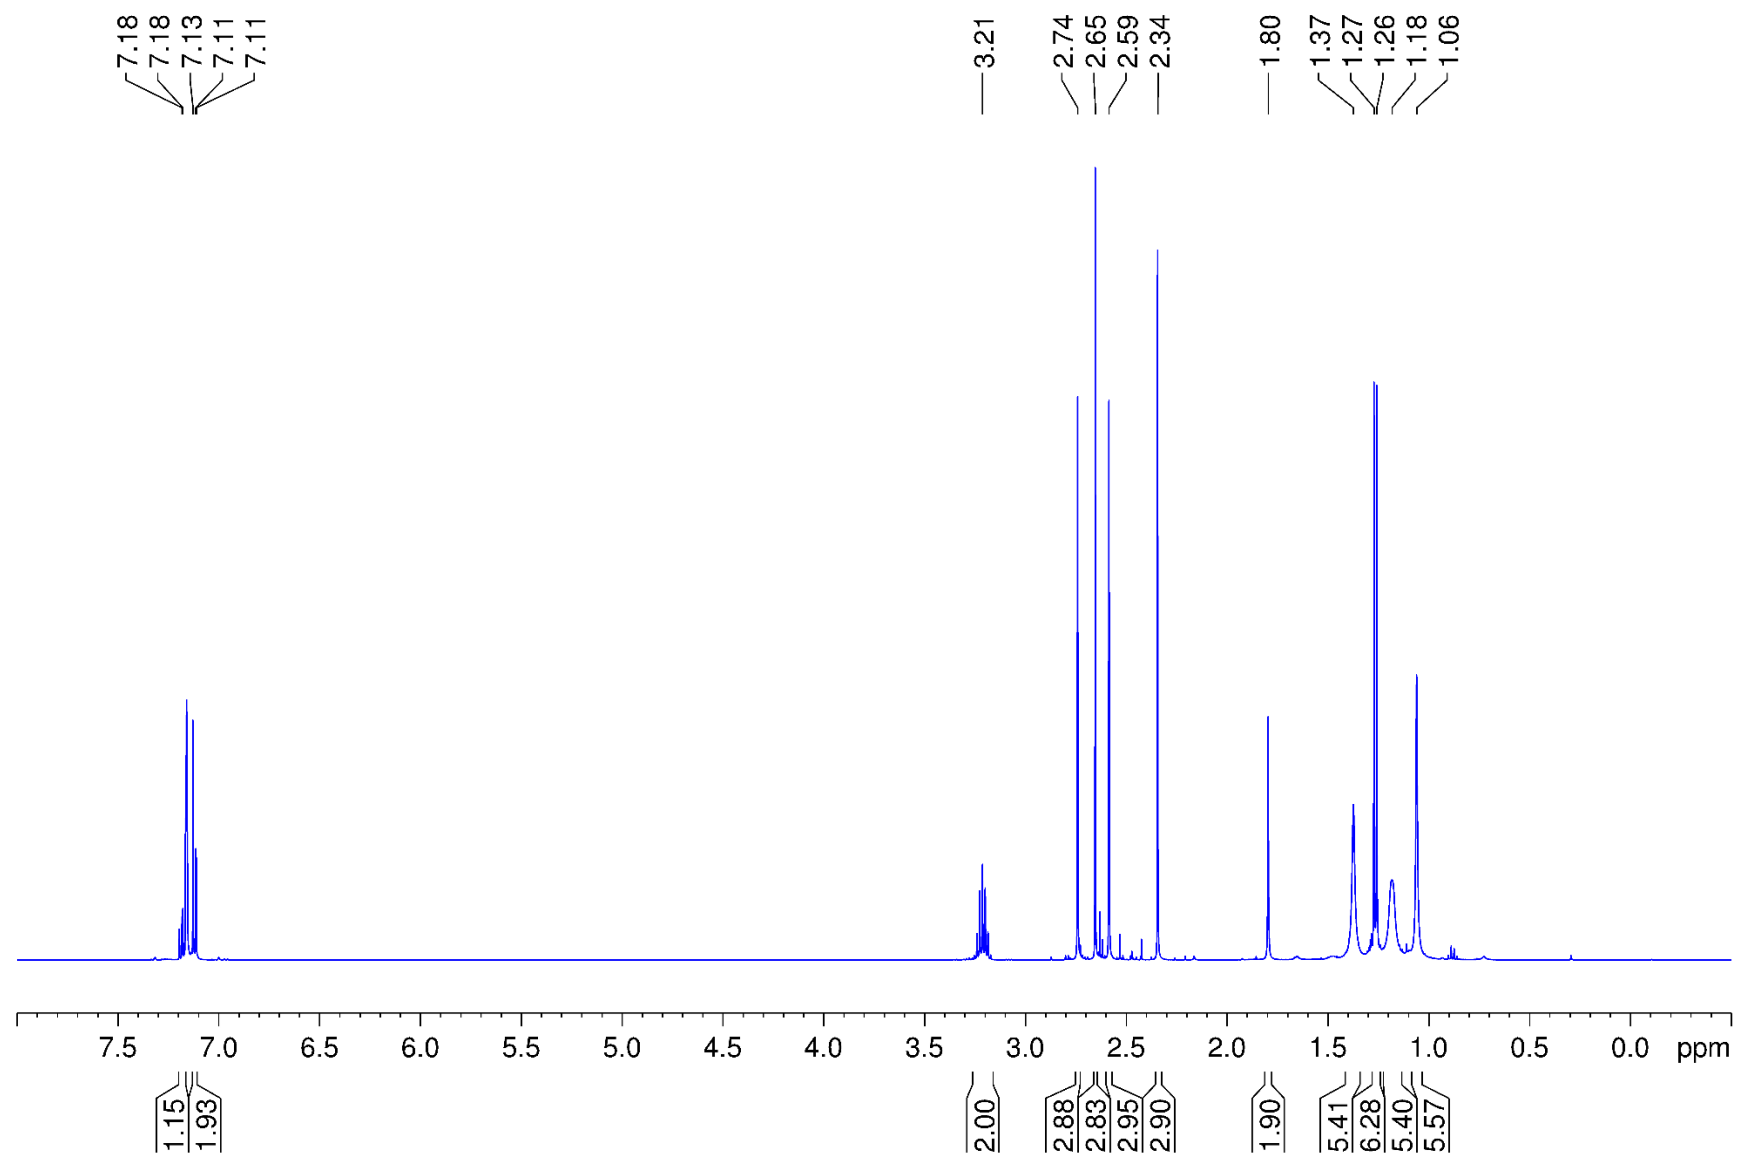

**Figure S37.**  $^1\text{H}\{^{11}\text{B}\}$  NMR spectrum of **4** in  $\text{C}_6\text{D}_6$ .

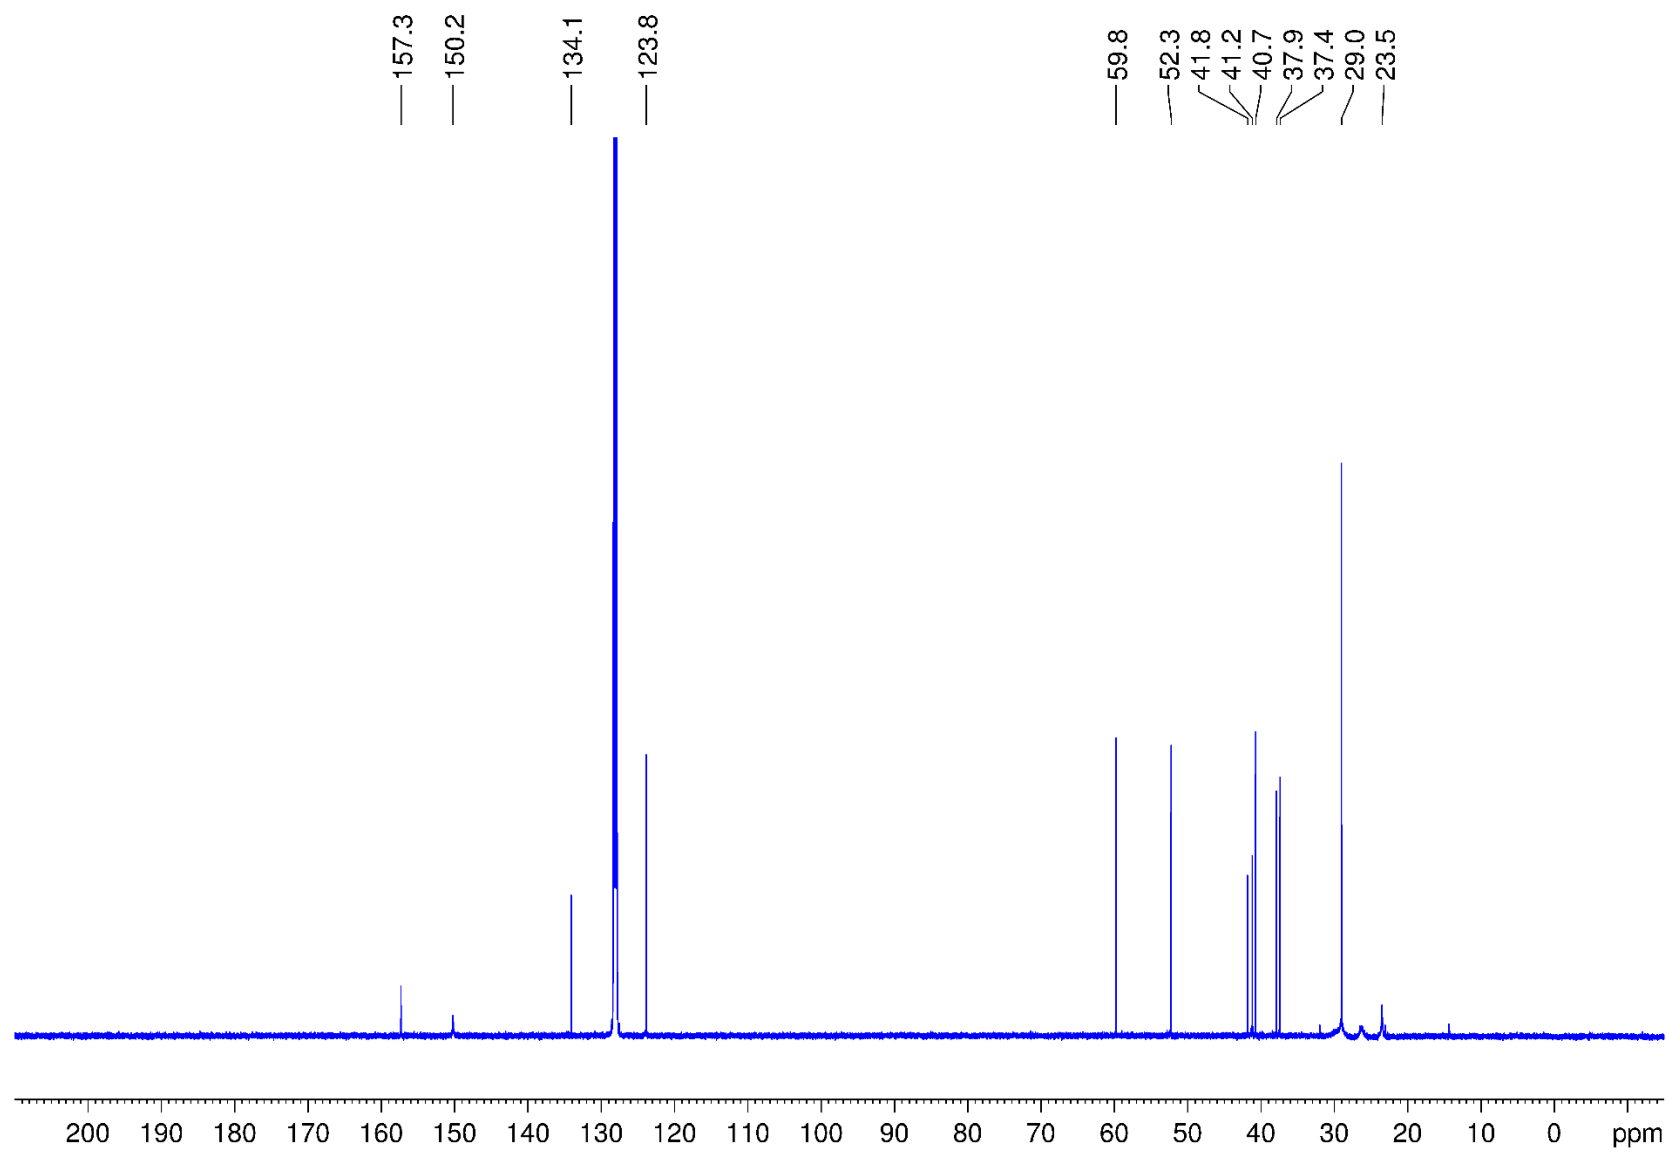

**Figure S38.**  $^{13}\text{C}\{^1\text{H}\}$  NMR spectrum of **4** in  $\text{C}_6\text{D}_6$ .



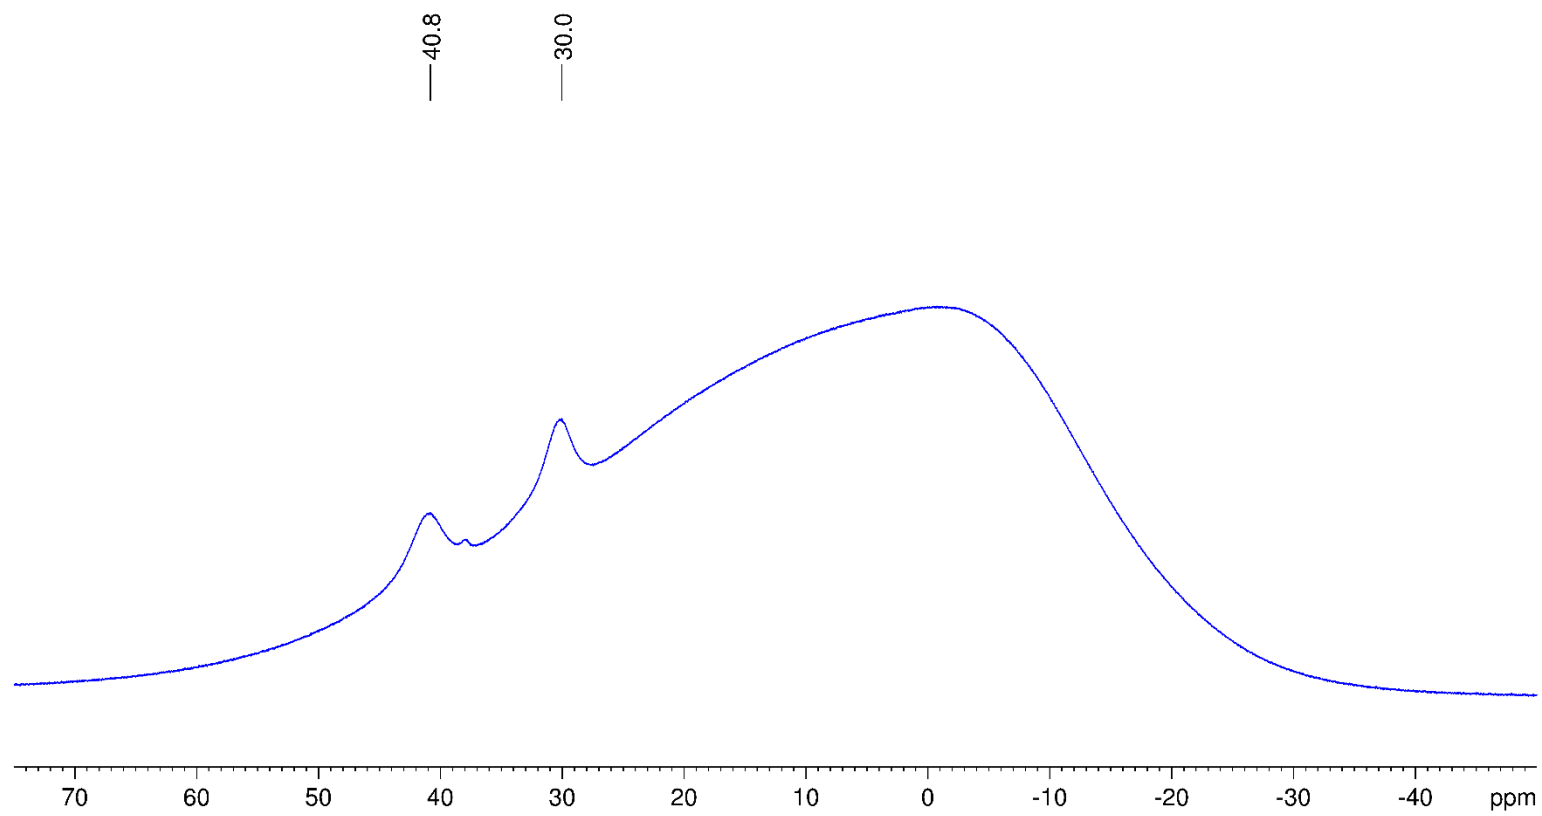

**Figure S39.**  $^{11}\text{B}$  NMR spectrum of **4** in  $\text{C}_6\text{D}_6$ .

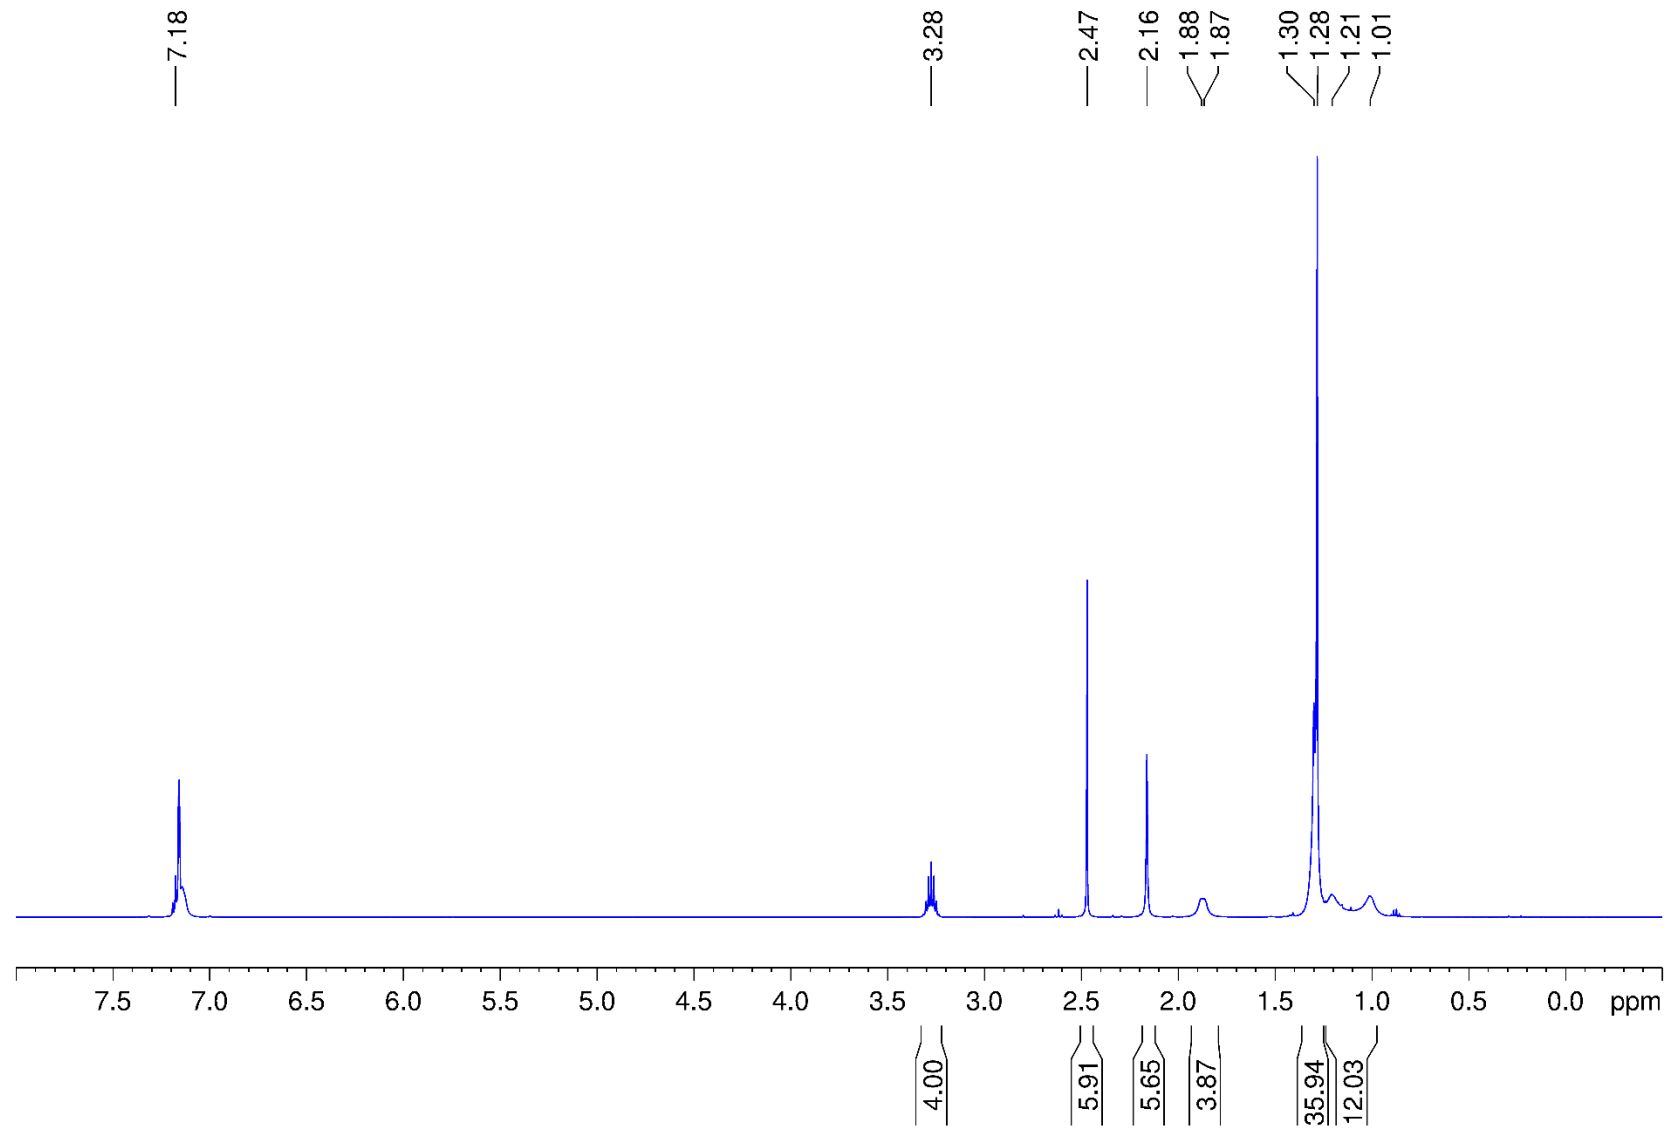

**Figure S40.**  $^1\text{H}\{^{11}\text{B}\}$  NMR spectrum of 5-NMe<sub>2</sub> in C<sub>6</sub>D<sub>6</sub>.

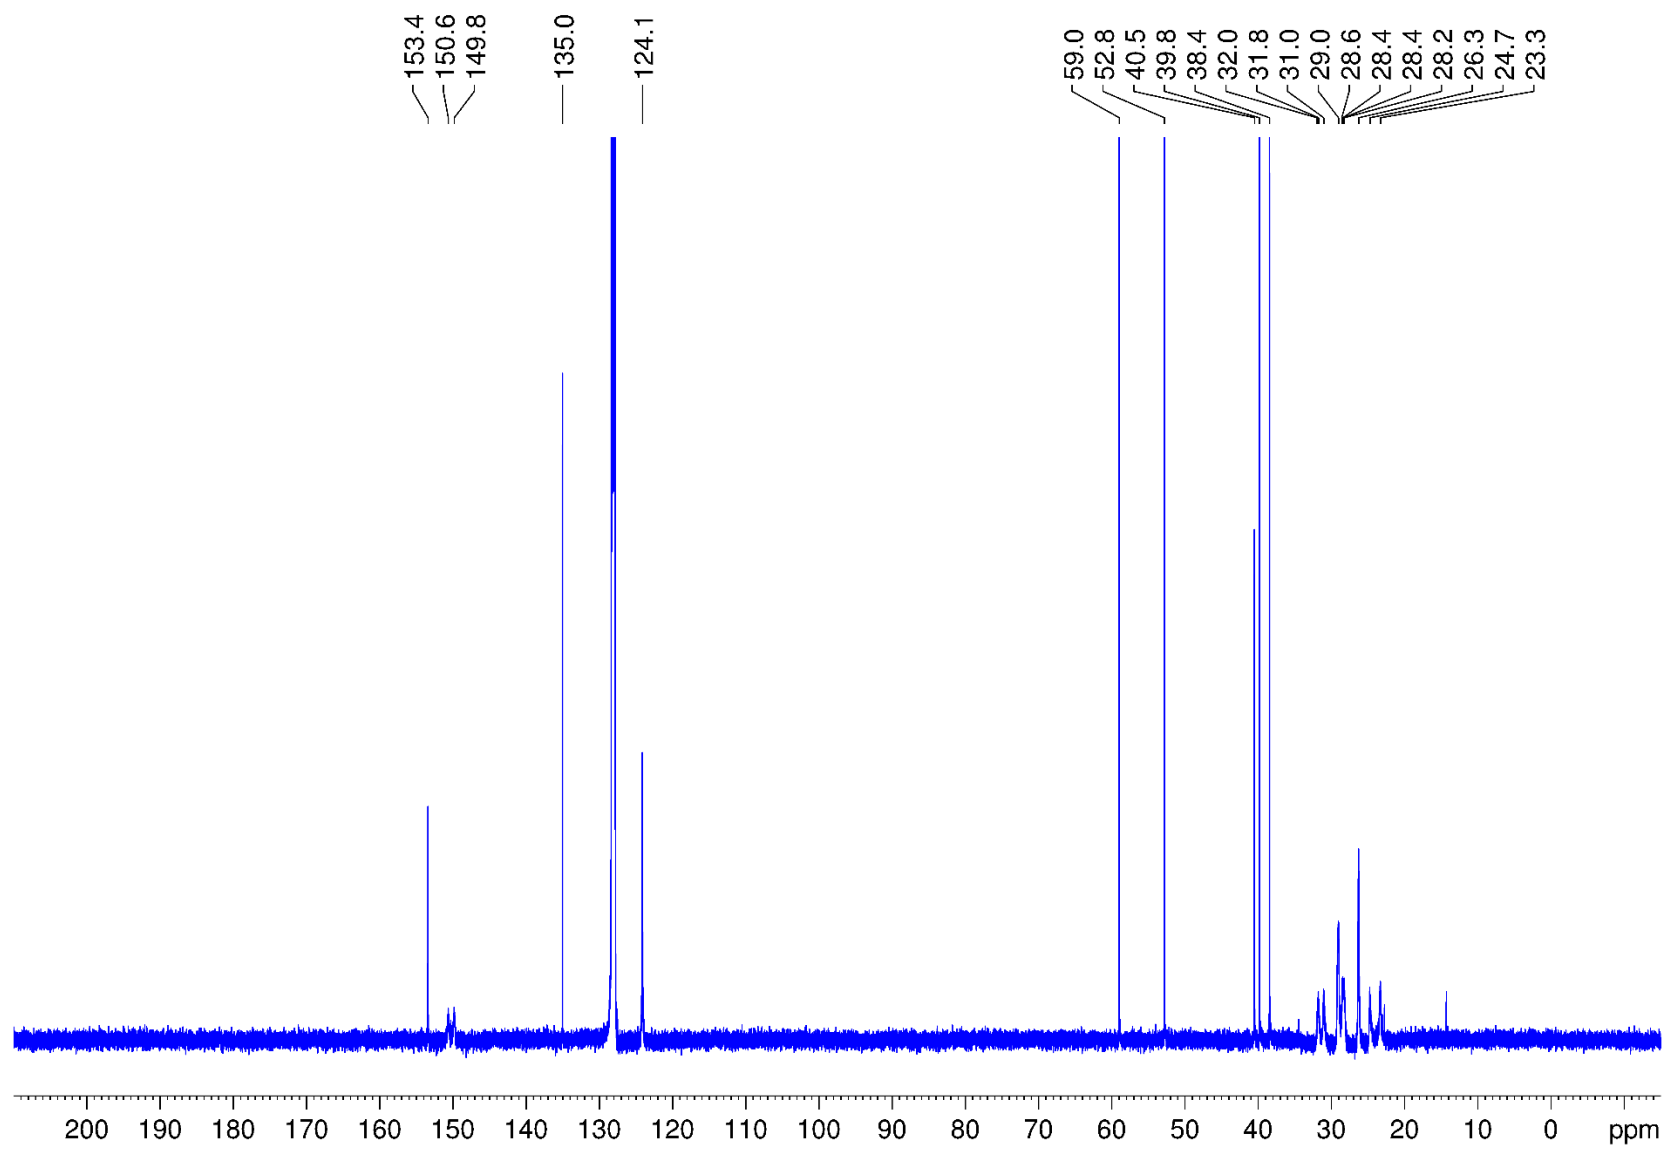

**Figure S41.**  $^{13}\text{C}\{^1\text{H}\}$  NMR spectrum of 5-NMe<sub>2</sub> in C<sub>6</sub>D<sub>6</sub>.

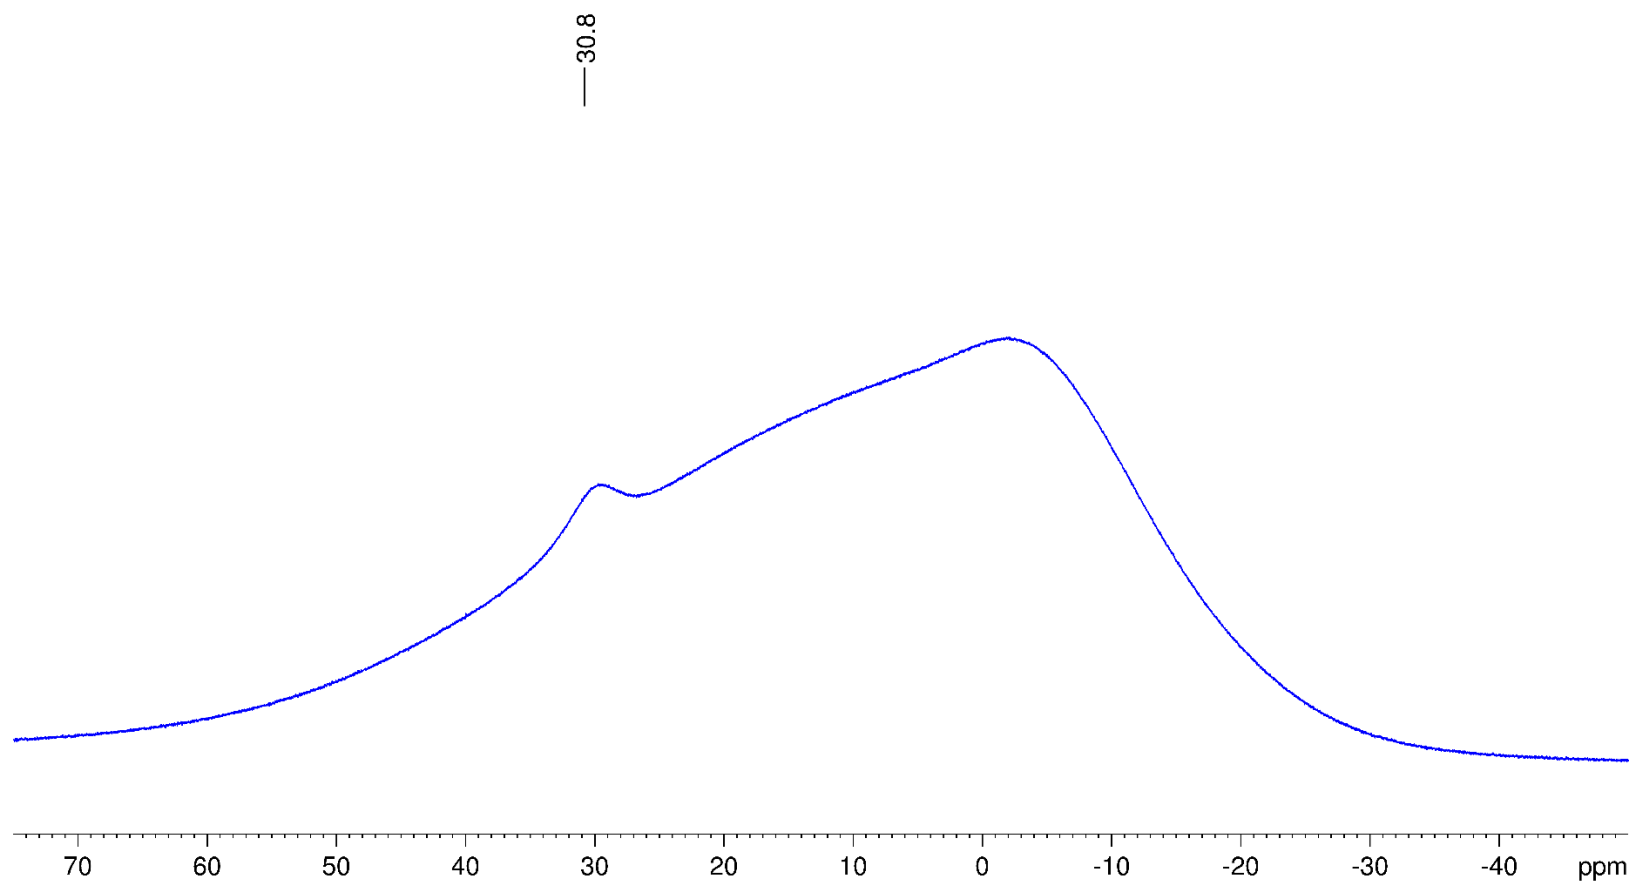

**Figure S42.**  $^{11}\text{B}$  NMR spectrum of 5-NMe<sub>2</sub> in C<sub>6</sub>D<sub>6</sub>.

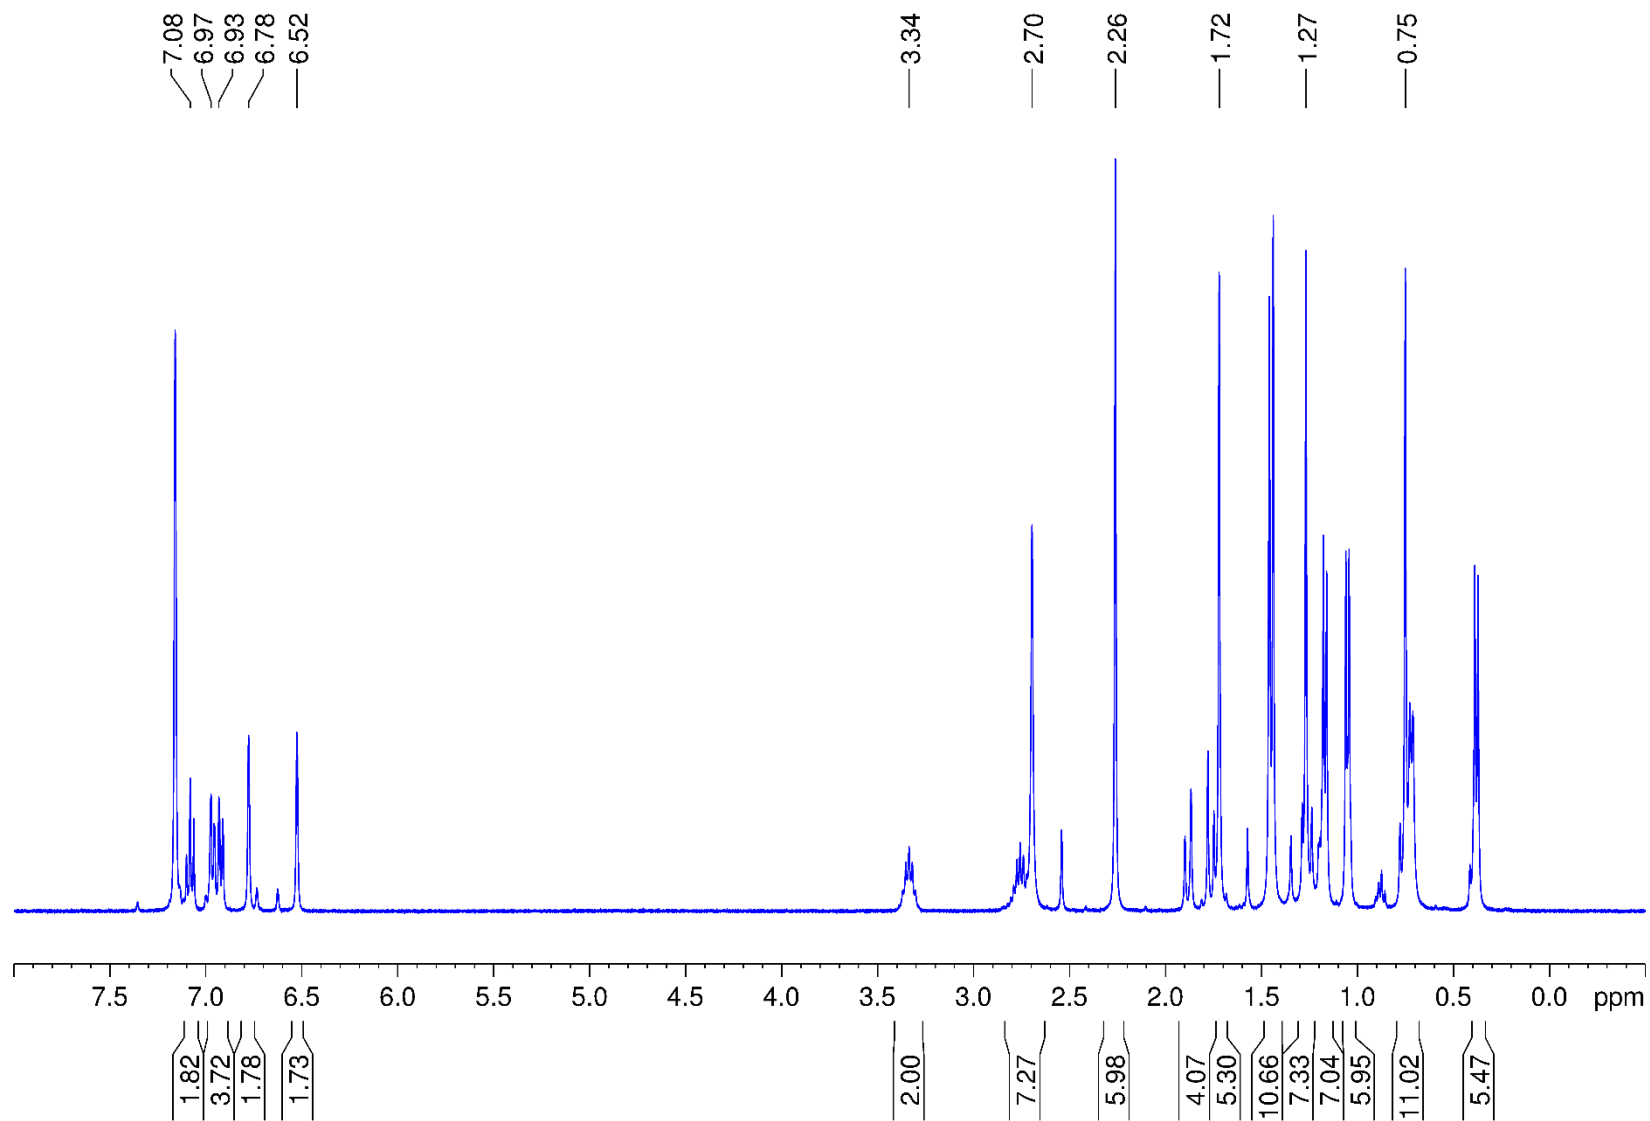

**Figure S43.**  $^1\text{H}\{^{11}\text{B}\}$  NMR spectrum of **5-Mes** in  $\text{C}_6\text{D}_6$ .

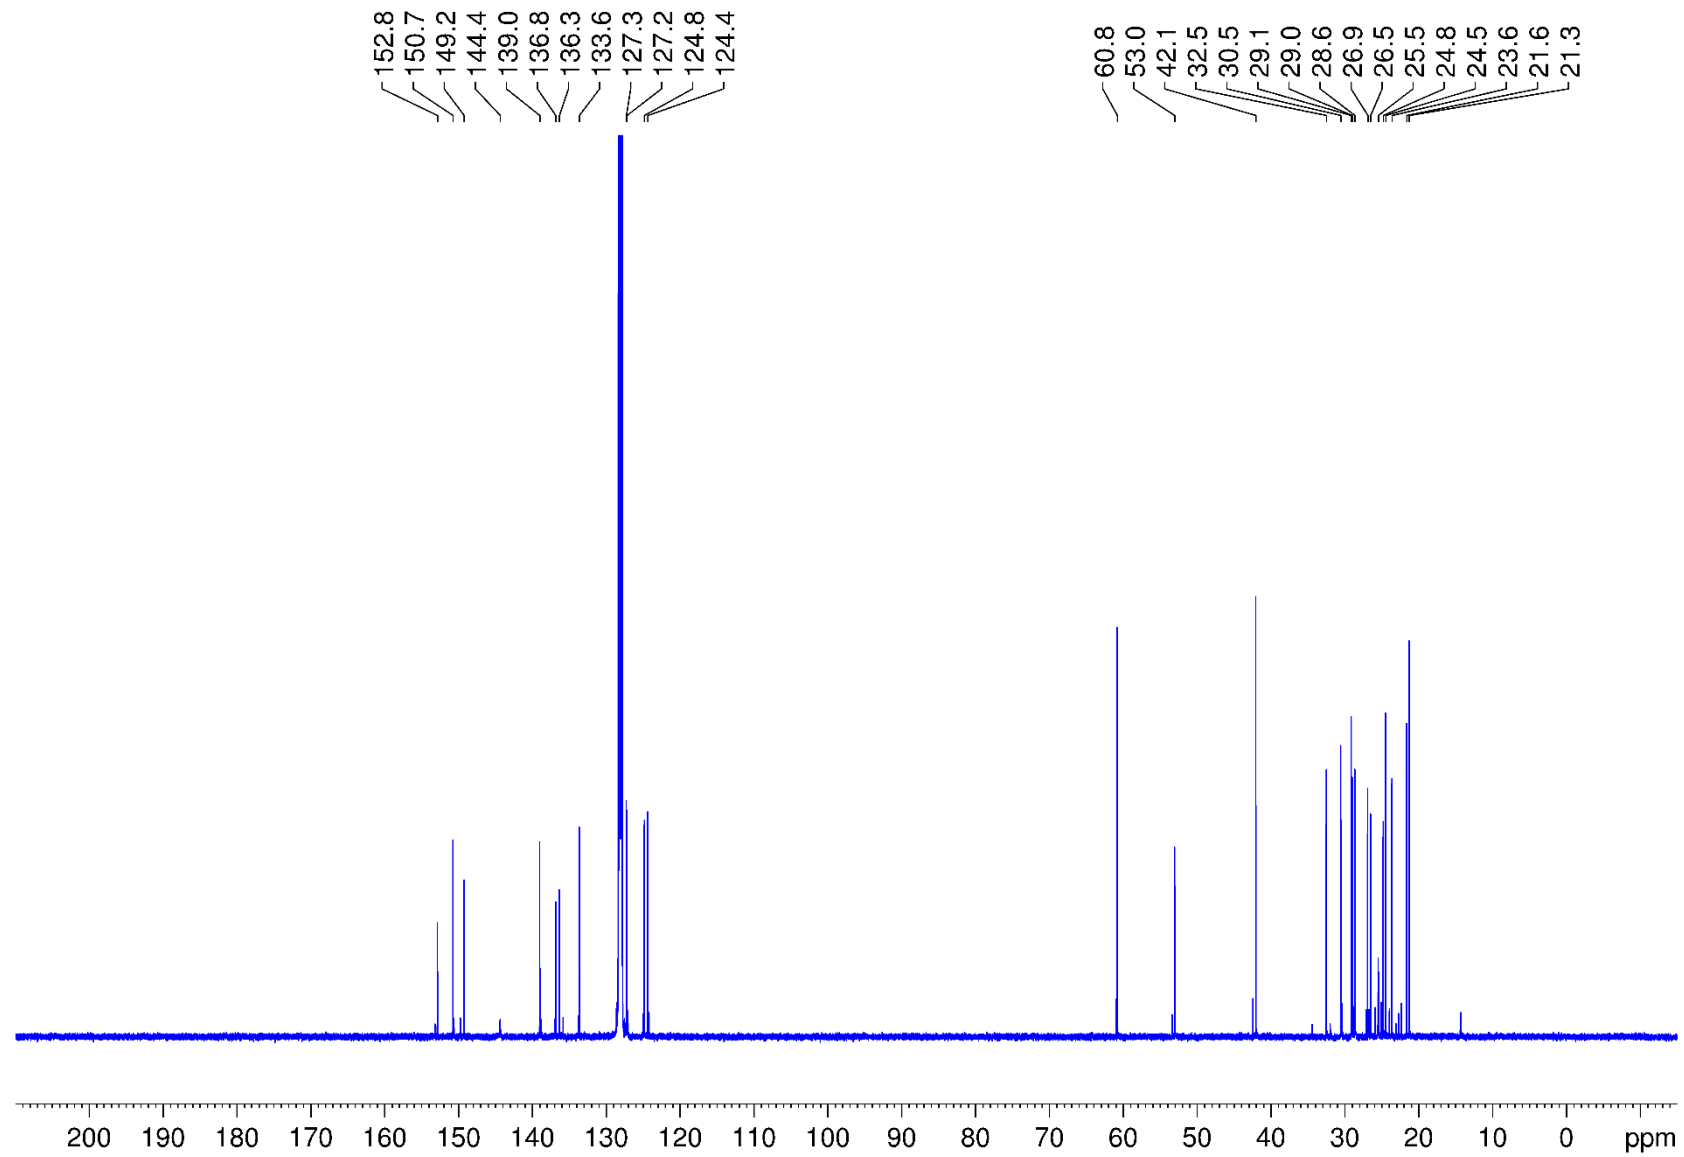

Figure S44.  $^{13}\text{C}\{^1\text{H}\}$  NMR spectrum of 5-Mes in  $\text{C}_6\text{D}_6$ .

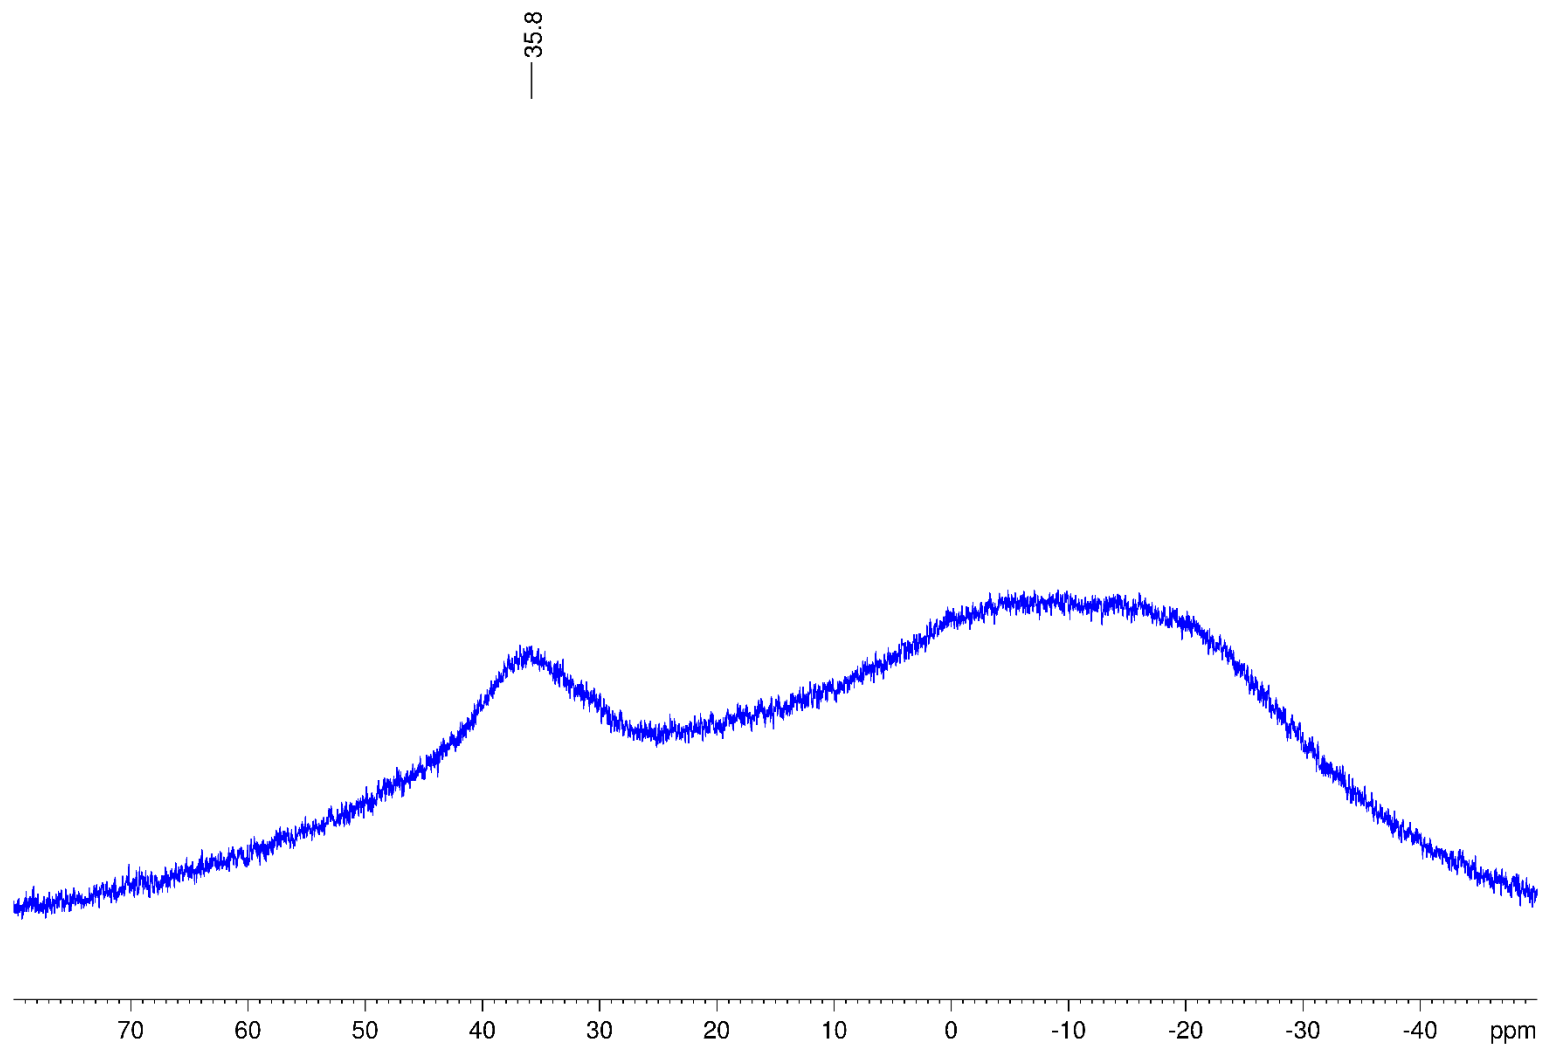

**Figure S45.**  $^{11}\text{B}$  NMR spectrum of **5-Mes** in  $\text{C}_6\text{D}_6$ .

## IR spectra

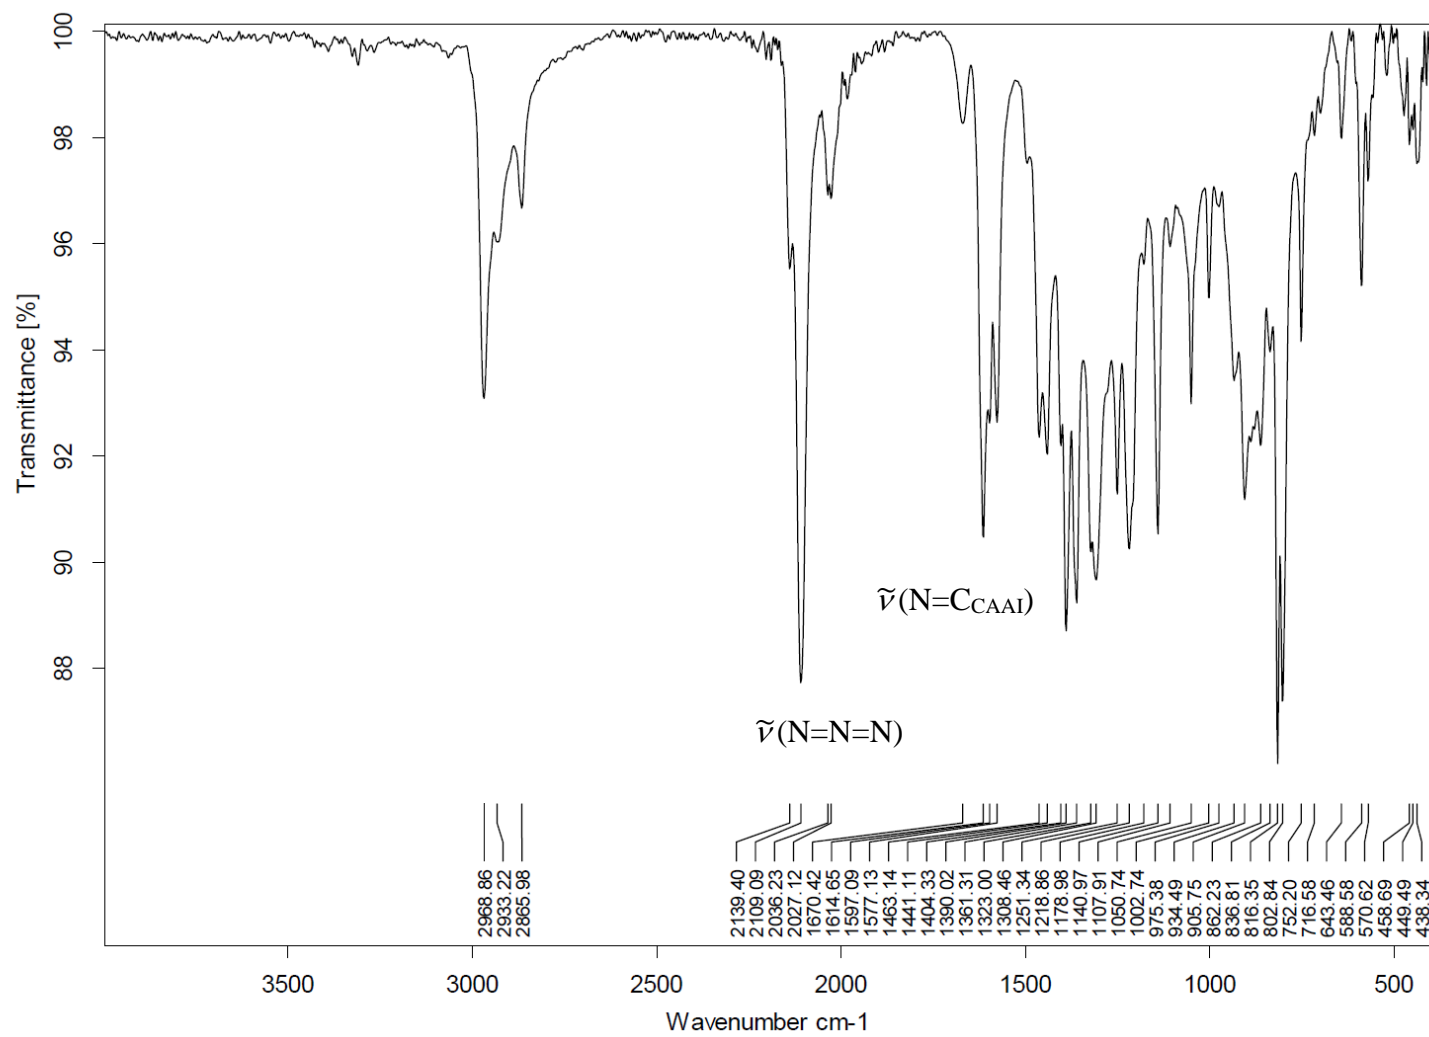

**Figure S46.** Solid-state IR spectrum of 3-N<sub>3</sub>.



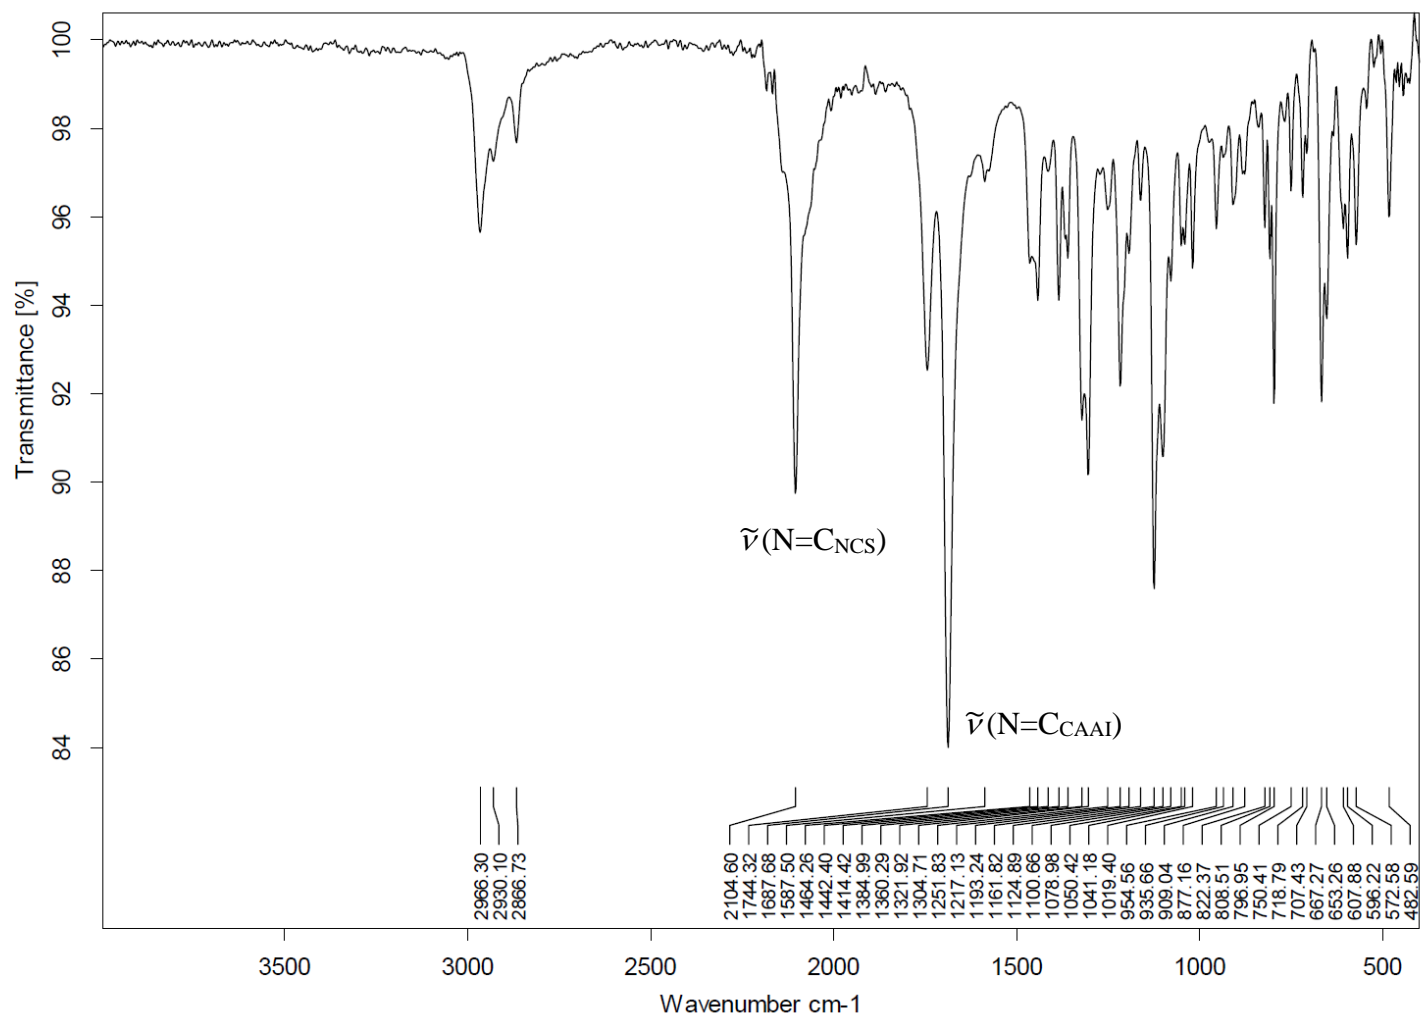

Figure S47. Solid-state IR spectrum of 3-NCS.

## X-ray crystallographic data

The crystal data of **2<sup>Br</sup>-NMe<sub>2</sub>**, **2<sup>Br</sup>-Mes**, **2<sup>Br</sup>-Ph**, **3-Br**, **3-N<sub>3</sub>** and **5-NMe<sub>2</sub>** were collected on a RIGAKU XTALAB SYNERGY-S diffractometer with a HPA area detector and multi-layer mirror monochromated Cu<sub>Kα</sub> radiation. The crystal data of **2<sup>Cl</sup>-NMe<sub>2</sub>** and **2<sup>Cl</sup>-Cl** were collected on a Bruker X8-APEX II diffractometer with a CCD area detector and multi-layer mirror monochromated Mo<sub>Kα</sub> radiation. The crystal data of **2<sup>Cl</sup>-Dur**, **3-NMe<sub>2</sub>**, **3-Ph**, **4** and **5-Mes** were collected on a Bruker D8 Quest diffractometer with a CMOS area detector and multi-layer mirror monochromated Mo<sub>Kα</sub> radiation. The structure was solved using intrinsic phasing method,<sup>7</sup> refined with the SHELXL program, and expanded using Fourier techniques.<sup>11</sup> All non-hydrogen atoms were refined anisotropically.

Crystallographic data have been deposited with the Cambridge Crystallographic Data Center as supplementary publication no. CCDC-2237053-2237066. These data can be obtained free of charge from The Cambridge Crystallographic Data Centre via [www.ccdc.cam.ac.uk/data\\_request/cif](http://www.ccdc.cam.ac.uk/data_request/cif).

**Table S1.** CCDC numbers of structurally characterised compounds.

|                                       | CCDC    |                          | CCDC    |
|---------------------------------------|---------|--------------------------|---------|
| <b>2<sup>Cl</sup>-NMe<sub>2</sub></b> | 2237055 | <b>3-Ph</b>              | 2237056 |
| <b>2<sup>Br</sup>-NMe<sub>2</sub></b> | 2237066 | <b>3-Br</b>              | 2237065 |
| <b>2<sup>Cl</sup>-Cl</b>              | 2237054 | <b>3-N<sub>3</sub></b>   | 2237058 |
| <b>2<sup>Cl</sup>-Dur</b>             | 2237061 | <b>3-NCS</b>             | 2237063 |
| <b>2<sup>Br</sup>-Mes</b>             | 2237053 | <b>4</b>                 | 2237057 |
| <b>2<sup>Br</sup>-Ph</b>              | 2237064 | <b>5-NMe<sub>2</sub></b> | 2237059 |
| <b>3-NMe<sub>2</sub></b>              | 2237062 | <b>5-Mes</b>             | 2237060 |

**Crystal data for 2<sup>Cl</sup>-NMe<sub>2</sub>:** C<sub>22</sub>H<sub>37</sub>BClN<sub>3</sub>,  $M_r = 389.80$ , colourless block, 0.36×0.321×0.21 mm<sup>3</sup>, monoclinic space group  $P2_1/c$ ,  $a = 17.943(10)$  Å,  $b = 9.057(4)$  Å,  $c = 14.529(8)$  Å,  $\beta = 105.28(3)^\circ$ ,  $V = 2278(2)$  Å<sup>3</sup>,  $Z = 4$ ,  $\rho_{\text{calcd}} = 1.137$  g·cm<sup>-3</sup>,  $\mu = 0.179$  mm<sup>-1</sup>,  $F(000) = 848$ ,  $T = 100(2)$  K,  $R_I = 0.0587$ ,  $wR_2 = 0.1038$ , 4476 independent reflections [ $2\theta \leq 52.04^\circ$ ] and 254 parameters.

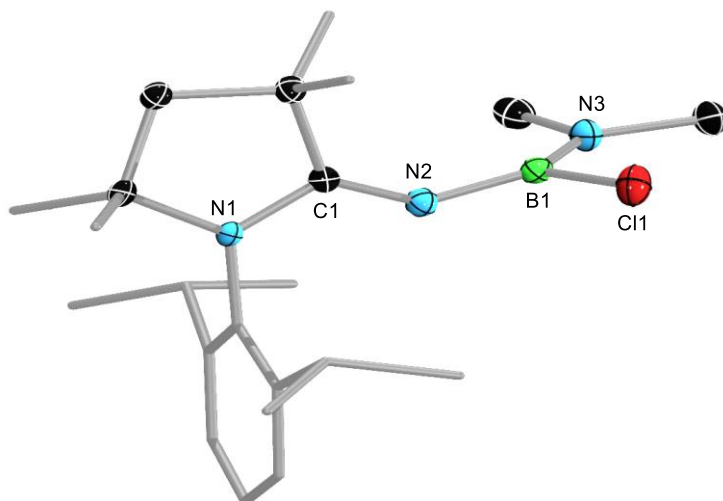

**Figure S48.** Solid-state structures of 2<sup>Cl</sup>-NMe<sub>2</sub>. Atomic displacement ellipsoids shown at 50%. Ellipsoids of ligand periphery and hydrogen atoms omitted for clarity.

**Refinement details for 2<sup>Br</sup>-NMe<sub>2</sub>:** The BBrNMe<sub>2</sub> fragment (B1 > C6) was modelled as twofold flip-disordered in a 85:15 ratio. 1,2- and 1,3-distances were restrained to similarity with SAME, ADPs with SIMU 0.002.

**Crystal data for 2<sup>Br</sup>-NMe<sub>2</sub>:** C<sub>22</sub>H<sub>37</sub>BBrN<sub>3</sub>, *M<sub>r</sub>* = 434.26, colourless plate, 0.410×0.110×0.070 mm<sup>3</sup>, monoclinic space group *P*2<sub>1</sub>/*c*, *a* = 18.0177(2) Å, *b* = 9.08810(10) Å, *c* = 14.5514(2) Å, β = 104.9120(10)°, *V* = 2302.50(5) Å<sup>3</sup>, *Z* = 4, ρ<sub>calcd</sub> = 1.253 g·cm<sup>-3</sup>, μ = 2.495 mm<sup>-1</sup>, *F*(000) = 920, *T* = 100(2) K, *R*<sub>1</sub> = 0.0475, *wR*<sub>2</sub> = 0.1250, 4836 independent reflections [2θ ≤ 154.638°] and 302 parameters.

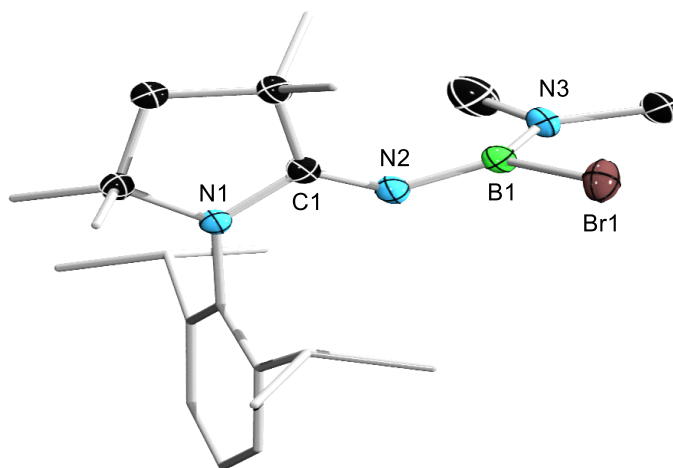

**Figure S49.** Solid-state structures of 2<sup>Br</sup>-NMe<sub>2</sub>. Atomic displacement ellipsoids shown at 50%. Ellipsoids of ligand periphery and hydrogen atoms omitted for clarity.

**Refinement details for 2<sup>Cl</sup>-Cl:** The BCl<sub>2</sub> unit was modelled as twofold rotationally disordered in a 94:6 ratio. ADPs within the disorder were restrained with SIMU 0.005.

**Crystal data for 2<sup>Cl</sup>-Cl:** C<sub>20</sub>H<sub>31</sub>BCl<sub>2</sub>N<sub>2</sub>,  $M_r = 381.18$ , colourless block, 0.488×0.298×0.270 mm<sup>3</sup>, monoclinic space group  $P2_1/n$ ,  $a = 14.270(6)$  Å,  $b = 10.149(4)$  Å,  $c = 14.806(6)$  Å,  $\beta = 97.11(2)^\circ$ ,  $V = 2127.9(15)$  Å<sup>3</sup>,  $Z = 4$ ,  $\rho_{\text{calcd}} = 1.190$  g·cm<sup>-3</sup>,  $\mu = 0.310$  mm<sup>-1</sup>,  $F(000) = 816$ ,  $T = 100(2)$  K,  $R_1 = 0.0436$ ,  $wR_2 = 0.1004$ , 4202 independent reflections [ $2\theta \leq 52.038^\circ$ ] and 253 parameters.

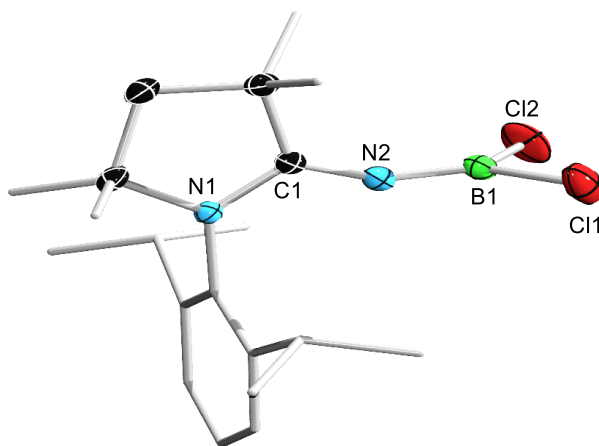

**Figure S50.** Solid-state structures of 2<sup>Cl</sup>-Cl. Atomic displacement ellipsoids shown at 50%. Ellipsoids of ligand periphery and hydrogen atoms omitted for clarity.

**Crystal data for 2<sup>Cl</sup>-Dur:** C<sub>30</sub>H<sub>44</sub>BClN<sub>2</sub>,  $M_r = 478.93$ , colourless block, 0.405×0.275×0.199 mm<sup>3</sup>, monoclinic space group  $P2_1/n$ ,  $a = 10.300(2)$  Å,  $b = 16.861(3)$  Å,  $c = 16.843(5)$  Å,  $\beta = 103.065(16)^\circ$ ,  $V = 2849.4(12)$  Å<sup>3</sup>,  $Z = 4$ ,  $\rho_{\text{calcd}} = 1.116$  g·cm<sup>-3</sup>,  $\mu = 0.154$  mm<sup>-1</sup>,  $F(000) = 1040$ ,  $T = 100(2)$  K,  $R_I = 0.0534$ ,  $wR_2 = 0.1182$ , 6076 independent reflections [ $2\theta \leq 53.766^\circ$ ] and 319 parameters.

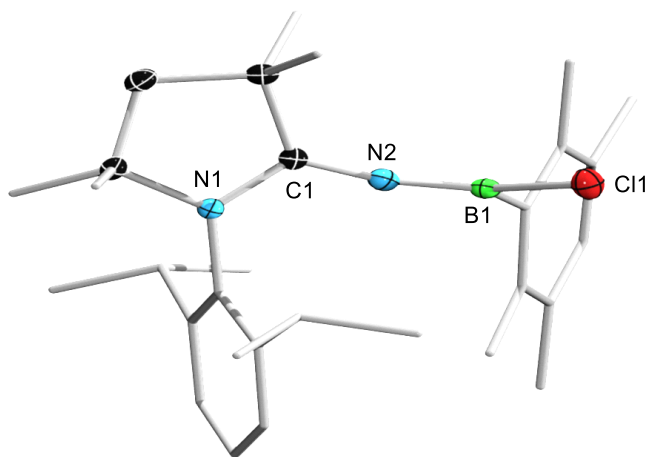

**Figure S51.** Solid-state structures of 2<sup>Cl</sup>-Dur. Atomic displacement ellipsoids shown at 50%. Ellipsoids of ligand periphery and hydrogen atoms omitted for clarity.

**Crystal data for 2<sup>Br</sup>-Mes:** C<sub>29</sub>H<sub>42</sub>BBrN<sub>2</sub>, *M*<sub>r</sub> = 509.36, colourless block, 0.289×0.230×0.063 mm<sup>3</sup>, monoclinic space group *P*1<sub>2</sub>1/*n*1, *a* = 10.0184(3) Å, *b* = 16.7493(4) Å, *c* = 17.4941(5) Å, β = 106.480(3)°, *V* = 2814.92(15) Å<sup>3</sup>, *Z* = 4, ρ<sub>calcd</sub> = 1.202 g·cm<sup>-3</sup>, μ = 1.479 mm<sup>-1</sup>, *F*(000) = 1080, *T* = 99.98(12) K, *R*<sub>1</sub> = 0.0549, *wR*<sub>2</sub> = 0.0811, 7292 independent reflections [2θ ≤ 62.2058°] and 309 parameters.

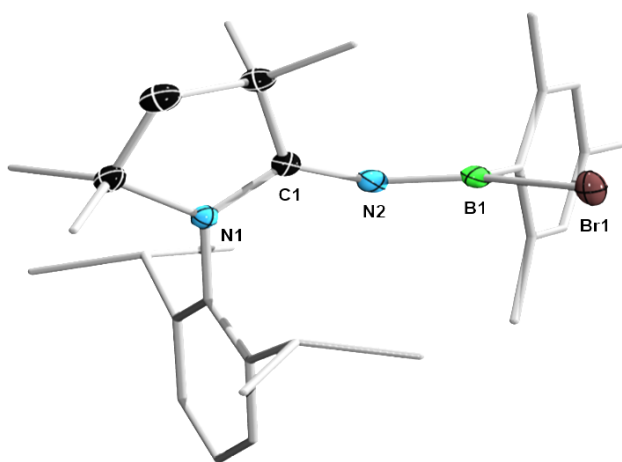

**Figure S52.** Solid-state structures of 2<sup>Br</sup>-Mes. Atomic displacement ellipsoids shown at 50%. Ellipsoids of ligand periphery and hydrogen atoms omitted for clarity.

**Refinement details for 2<sup>Br</sup>-Ph:** Refined as a 2-component twin. Component 2 rotated by  $-179.9271^\circ$  around  $[0.00\ 0.00\ 1.00]$  (reciprocal) or  $[-0.16\ -0.06\ 0.98]$  (direct) The BASF parameter was refined to 30.6%. Some reflections were removed from refinement as outliers, these likely belong to a third twin component, which could not be modelled adequately.

**Crystal data for 2<sup>Br</sup>-Ph:**  $C_{26}H_{36}BBrN_2$ ,  $M_r = 467.29$ , colourless plate,  $0.149 \times 0.038 \times 0.006\text{ mm}^3$ , triclinic space group  $P\bar{1}$ ,  $a = 9.3778(3)\text{ \AA}$ ,  $b = 13.0392(3)\text{ \AA}$ ,  $c = 20.8478(6)\text{ \AA}$ ,  $\alpha = 86.673(2)^\circ$ ,  $\beta = 85.097(2)^\circ$ ,  $\gamma = 75.815(2)^\circ$ ,  $V = 2460.66(12)\text{ \AA}^3$ ,  $Z = 4$ ,  $\rho_{\text{calcd}} = 1.261\text{ g}\cdot\text{cm}^{-3}$ ,  $\mu = 2.365\text{ mm}^{-1}$ ,  $F(000) = 984$ ,  $T = 100(2)\text{ K}$ ,  $R_I = 0.0884$ ,  $wR_2 = 0.2428$ , 14301 independent reflections [ $2\theta \leq 140.15^\circ$ ] and 558 parameters.

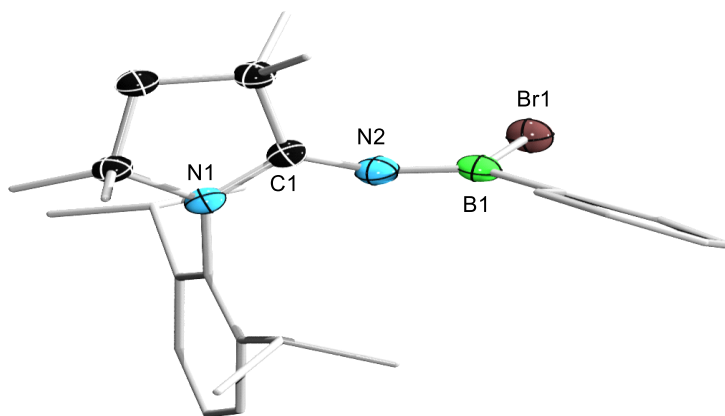

**Figure S53.** Solid-state structures of 2<sup>Br</sup>-Ph. Atomic displacement ellipsoids shown at 50%. Ellipsoids of ligand periphery and hydrogen atoms omitted for clarity.



**Crystal data for 3-NMe<sub>2</sub>:** C<sub>42</sub>H<sub>68</sub>BN<sub>5</sub>,  $M_r = 653.82$ , colourless block, 0.604×0.285×0.212 mm<sup>3</sup>, triclinic space group  $P\bar{1}$ ,  $a = 9.654(3)$  Å,  $b = 14.571(4)$  Å,  $c = 16.429(10)$  Å,  $\alpha = 65.392(11)^\circ$ ,  $\beta = 79.27(2)^\circ$ ,  $\gamma = 70.736(12)^\circ$ ,  $V = 1980.4(15)$  Å<sup>3</sup>,  $Z = 2$ ,  $\rho_{\text{calcd}} = 1.096$  g·cm<sup>-3</sup>,  $\mu = 0.064$  mm<sup>-1</sup>,  $F(000) = 720$ ,  $T = 100$  K,  $R_I = 0.0609$ ,  $wR^2 = 0.1018$ , 7781 independent reflections [ $2\theta \leq 52.044^\circ$ ] and 451 parameters.

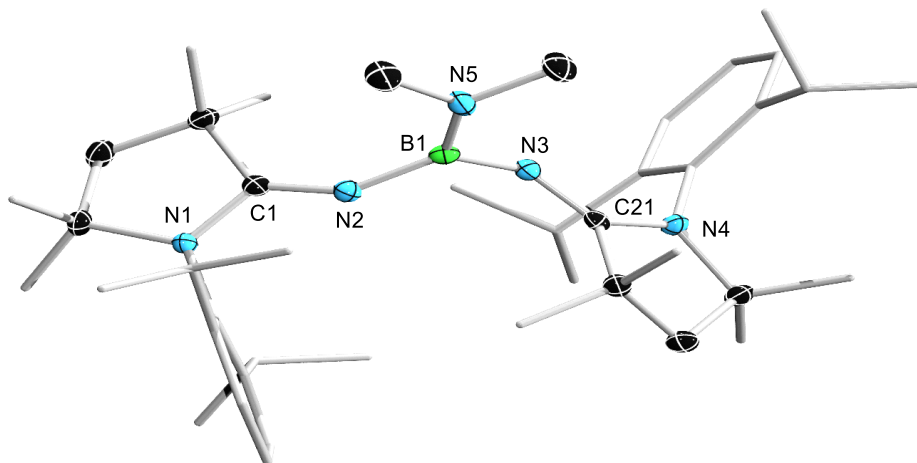

**Figure S54.** Solid-state structures of **3-NMe<sub>2</sub>**. Atomic displacement ellipsoids shown at 50%. Ellipsoids of ligand periphery and hydrogen atoms omitted for clarity.

**Refinement details for 3-Ph:** The asymmetric unit contains half a toluene molecules positioned on an inversion centre and modelled as twofold rotational disorder in an 11:39 ratio with PARTs -1 and -2. The phenyl rings within this disorder were idealized with AFIX 66. 1,2- and 1,3-distances were restrained to similarity with SAME 0.005 and ADPs with SIMU 0.01 and ISOR 0.005.

**Crystal data for 3-Ph:**  $C_{49.50}H_{71}BN_4$ ,  $M_r = 732.91$ , colourless block,  $0.492 \times 0.456 \times 0.343$  mm<sup>3</sup>, triclinic space group  $P\bar{1}$ ,  $a = 9.261(15)$  Å,  $b = 11.923(19)$  Å,  $c = 20.48(3)$  Å,  $\alpha = 91.46(3)^\circ$ ,  $\beta = 91.08(5)^\circ$ ,  $\gamma = 96.36(3)^\circ$ ,  $V = 2246(6)$  Å<sup>3</sup>,  $Z = 2$ ,  $\rho_{calcd} = 1.084$  g·cm<sup>-3</sup>,  $\mu = 0.062$  mm<sup>-1</sup>,  $F(000) = 802$ ,  $T = 100(2)$  K,  $R_1 = 0.0978$ ,  $wR_2 = 0.1490$ , 8867 independent reflections [ $2\theta \leq 52.044^\circ$ ] and 581 parameters.

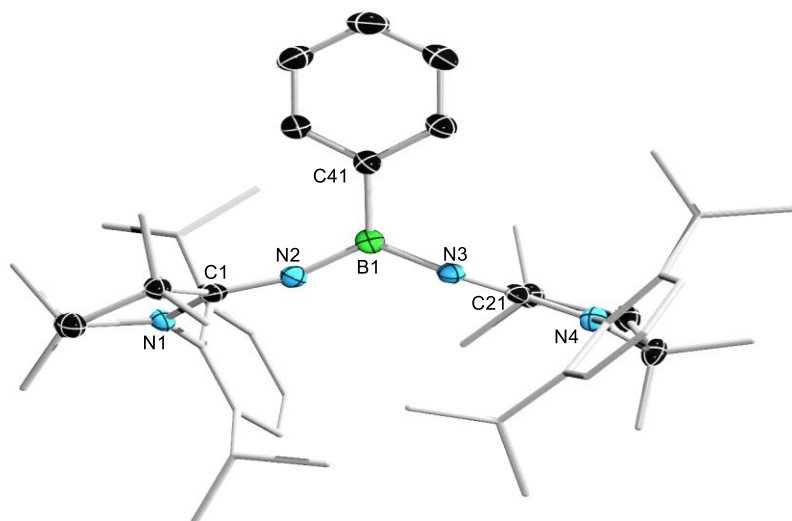

**Figure S55.** Solid-state structures of **3-Ph**. Atomic displacement ellipsoids shown at 50%. Ellipsoids of ligand periphery and hydrogen atoms omitted for clarity.

**Crystal data for 3-Br:**  $C_{40}H_{62}BBrN_4$ ,  $M_r = 689.65$ , colourless block,  $0.289 \times 0.169 \times 0.164 \text{ mm}^3$ , monoclinic space group  $P2_1$ ,  $a = 9.55970(10) \text{ \AA}$ ,  $b = 9.60350(10) \text{ \AA}$ ,  $c = 21.56940(10) \text{ \AA}$ ,  $\beta = 94.2800(10)^\circ$ ,  $V = 1974.69(3) \text{ \AA}^3$ ,  $Z = 2$ ,  $\rho_{\text{calcd}} = 1.160 \text{ g}\cdot\text{cm}^{-3}$ ,  $\mu = 1.638 \text{ mm}^{-1}$ ,  $F(000) = 740$ ,  $T = 100.00(10) \text{ K}$ ,  $R_I = 0.0229$ ,  $wR_2 = 0.0614$ , Flack parameter =  $-0.019(6)$ , 7493 independent reflections [ $2\theta \leq 140.136^\circ$ ] and 431 parameters.

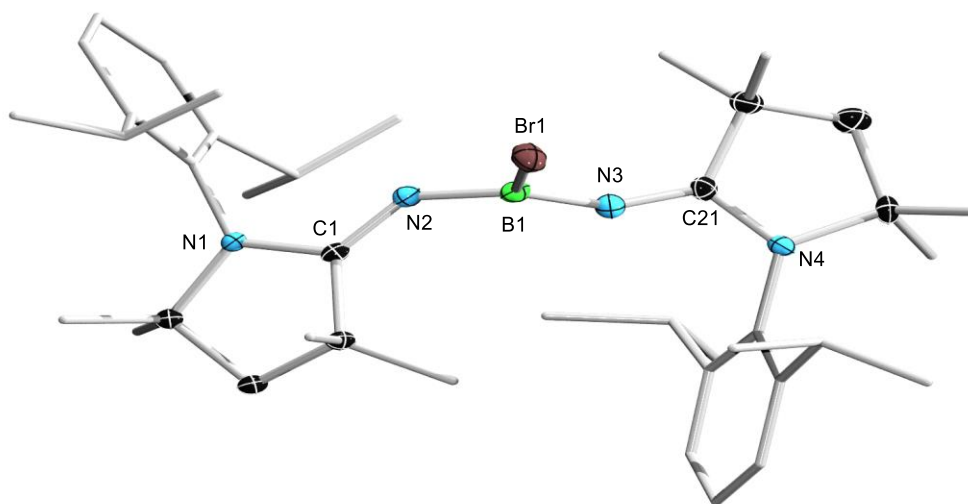

**Figure S56.** Solid-state structures of **3-Br**. Atomic displacement ellipsoids shown at 50%. Ellipsoids of ligand periphery and hydrogen atoms omitted for clarity.

**Refinement details for 3-N<sub>3</sub>:** The ADPs of the azide nitrogen atoms N5 > N7 were restrained with SIMU 0.001 to avoid a Hirshfeld test alert.

**Crystal data for 3-N<sub>3</sub>:** C<sub>40</sub>H<sub>62</sub>BN<sub>7</sub>,  $M_r = 651.77$ , colourless block, 0.271×0.194×0.115 mm<sup>3</sup>, monoclinic space group  $P2_1/c$ ,  $a = 9.52340(10)$  Å,  $b = 12.29820(10)$  Å,  $c = 33.6499(2)$  Å,  $\beta = 96.8590(10)^\circ$ ,  $V = 3912.89(6)$  Å<sup>3</sup>,  $Z = 4$ ,  $\rho_{\text{calcd}} = 1.106$  g·cm<sup>-3</sup>,  $\mu = 0.500$  mm<sup>-1</sup>,  $F(000) = 1424$ ,  $T = 99.99(10)$  K,  $R_1 = 0.0395$ ,  $wR_2 = 0.0963$ , 8054 independent reflections [ $2\theta \leq 150.644^\circ$ ] and 449 parameters.

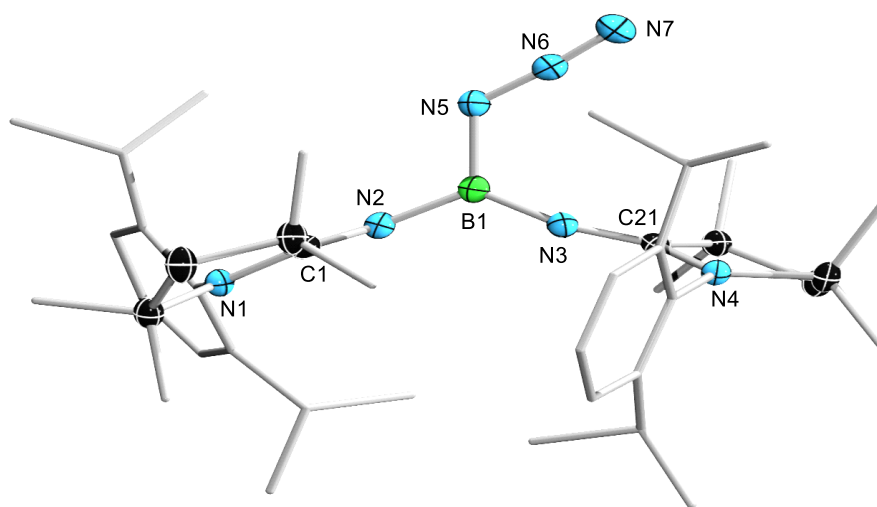

**Figure S57.** Solid-state structures of 3-N<sub>3</sub>. Atomic displacement ellipsoids shown at 50%. Ellipsoids of ligand periphery and hydrogen atoms omitted for clarity.

**Refinement details for 3-NCS:** The CAAC backbone was modelled with a twofold flip-disorder in C3 > C9 in a 57:43 ratio. 1,2- and 1,3-distances within the disorder were restrained with SAME, ADPs with SIMU 0.002.

**Crystal data for 3-NCS:** C<sub>41</sub>H<sub>62</sub>BN<sub>5</sub>S, *M*<sub>r</sub> = 667.82, colourless plate, 0.383×0.181×0.047 mm<sup>3</sup>, monoclinic space group *P*2<sub>1</sub>/*c*, *a* = 9.53740(10) Å, *b* = 19.8419(2) Å, *c* = 21.4198(2) Å, β = 97.1630(10)°, *V* = 4021.85(7) Å<sup>3</sup>, *Z* = 4, ρ<sub>calcd</sub> = 1.103 g·cm<sup>-3</sup>, μ = 0.955 mm<sup>-1</sup>, *F*(000) = 1456, *T* = 100.00(10) K, *R*<sub>1</sub> = 0.0472, *wR*<sub>2</sub> = 0.1059, 7646 independent reflections [2θ ≤ 140.144°] and 517 parameters.

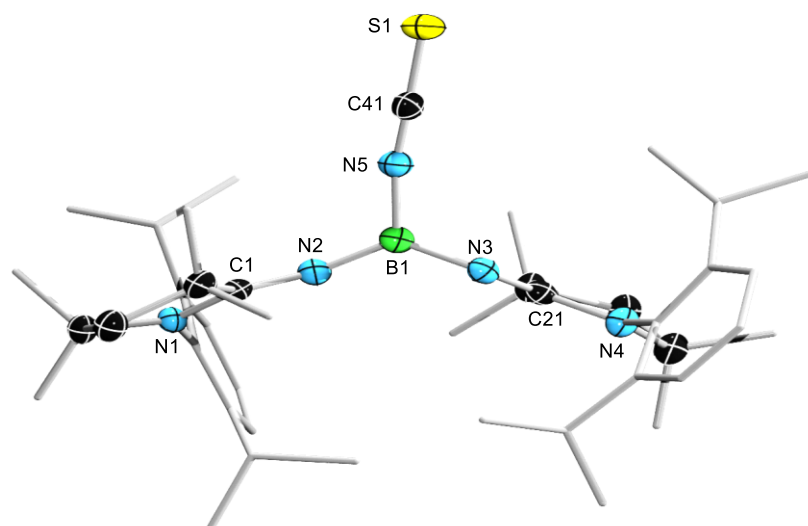

**Figure S58.** Solid-state structures of **3-NCS**. Atomic displacement ellipsoids shown at 50%. Ellipsoids of ligand periphery and hydrogen atoms omitted for clarity.

**Crystal data for 4:**  $C_{48}H_{86}B_4Cl_2N_8$ ,  $M_r = 889.38$ , colourless plate,  $0.317 \times 0.252 \times 0.100 \text{ mm}^3$ , triclinic space group  $P \bar{1}$ ,  $a = 10.834(3) \text{ \AA}$ ,  $b = 16.640(5) \text{ \AA}$ ,  $c = 16.947(6) \text{ \AA}$ ,  $\alpha = 65.006(8)^\circ$ ,  $\beta = 89.810(8)^\circ$ ,  $\gamma = 78.779(12)^\circ$ ,  $V = 2705.3(16) \text{ \AA}^3$ ,  $Z = 2$ ,  $\rho_{\text{calcd}} = 1.092 \text{ g}\cdot\text{cm}^{-3}$ ,  $\mu = 0.159 \text{ mm}^{-1}$ ,  $F(000) = 968$ ,  $T = 100(2) \text{ K}$ ,  $R_I = 0.0536$ ,  $wR^2 = 0.0923$ , 10646 independent reflections [ $2\theta \leq 52.04^\circ$ ] and 583 parameters.

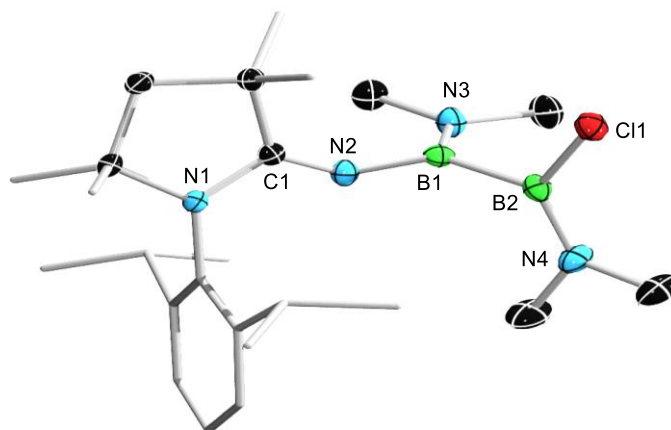

**Figure S59.** Solid-state structures of **4**. Atomic displacement ellipsoids shown at 50%. Ellipsoids of ligand periphery and hydrogen atoms omitted for clarity.

**Refinement details for 5-NMe<sub>2</sub>:** The CAAC backbone was modelled as twofold flip-disordered in C4 > C9 in a87:13 ratio. ADPs within the disorder were restrained with SIMU 0.005. One reflection affected by the beamstop was omitted (11 3 10).

**Crystal data for 5-NMe<sub>2</sub>:** C<sub>44</sub>H<sub>74</sub>B<sub>2</sub>N<sub>6</sub>,  $M_r = 708.71$ , colourless block, 0.360×0.230×0.190 mm<sup>3</sup>, monoclinic space group *C2/c*,  $a = 10.63470(10)$  Å,  $b = 16.5638(3)$  Å,  $c = 25.4585(3)$  Å,  $\beta = 100.6440(10)^\circ$ ,  $V = 4407.38(10)$  Å<sup>3</sup>,  $Z = 4$ ,  $r_{\text{calcd}} = 1.068$  g·cm<sup>-3</sup>,  $\mu = 0.465$  mm<sup>-1</sup>,  $F(000) = 1560$ ,  $T = 100(2)$  K,  $R_1 = 0.0592$ ,  $wR_2 = 0.1509$ , 4554 independent reflections [ $2\theta \leq 154.926^\circ$ ] and 304 parameters.

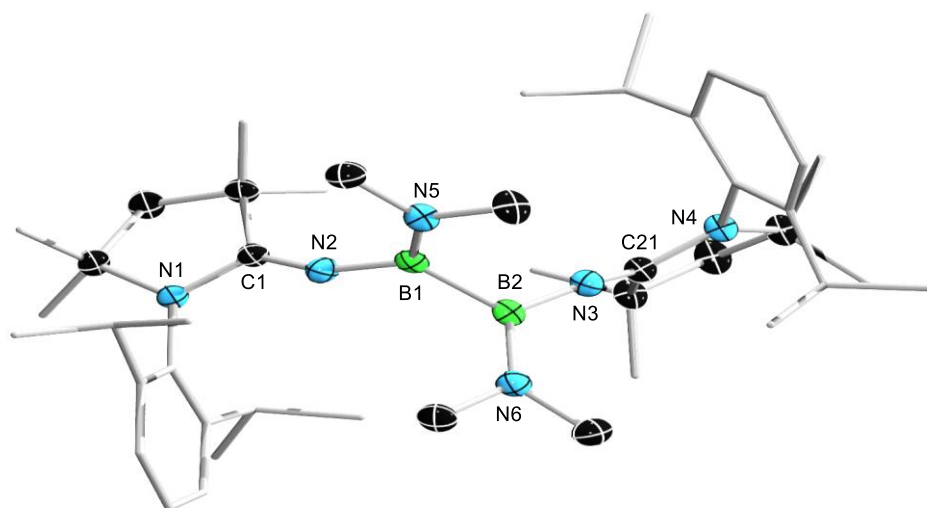

**Figure S60.** Solid-state structures of 5-NMe<sub>2</sub>. Atomic displacement ellipsoids shown at 50%. Ellipsoids of ligand periphery and hydrogen atoms omitted for clarity.

**Refinement details for 5-Mes:** The benzene molecule was modelled as twofold rotationally disordered in a 7:3 ratio. The rings within this disorder were idealized with AFIX 6 and ADPs restrained with SIMU 0.005.

**Crystal data for 5-Mes:**  $C_{64}H_{90}B_2N_4$ ,  $M_r = 937.01$ , colourless block,  $0.327 \times 0.262 \times 0.253 \text{ mm}^3$ , triclinic space group  $P \bar{1}$ ,  $a = 10.897(2) \text{ \AA}$ ,  $b = 13.450(3) \text{ \AA}$ ,  $c = 20.469(4) \text{ \AA}$ ,  $\alpha = 88.759(12)^\circ$ ,  $\beta = 74.992(10)^\circ$ ,  $\gamma = 82.039(7)^\circ$ ,  $V = 2869.4(10) \text{ \AA}^3$ ,  $Z = 2$ ,  $\rho_{\text{calcd}} = 1.085 \text{ g}\cdot\text{cm}^{-3}$ ,  $\mu = 0.062 \text{ mm}^{-1}$ ,  $F(000) = 1024$ ,  $T = 100(2) \text{ K}$ ,  $R_1 = 0.0483$ ,  $wR_2 = 0.1067$ , 11289 independent reflections [ $2\theta \leq 52.044^\circ$ ] and 684 parameters.

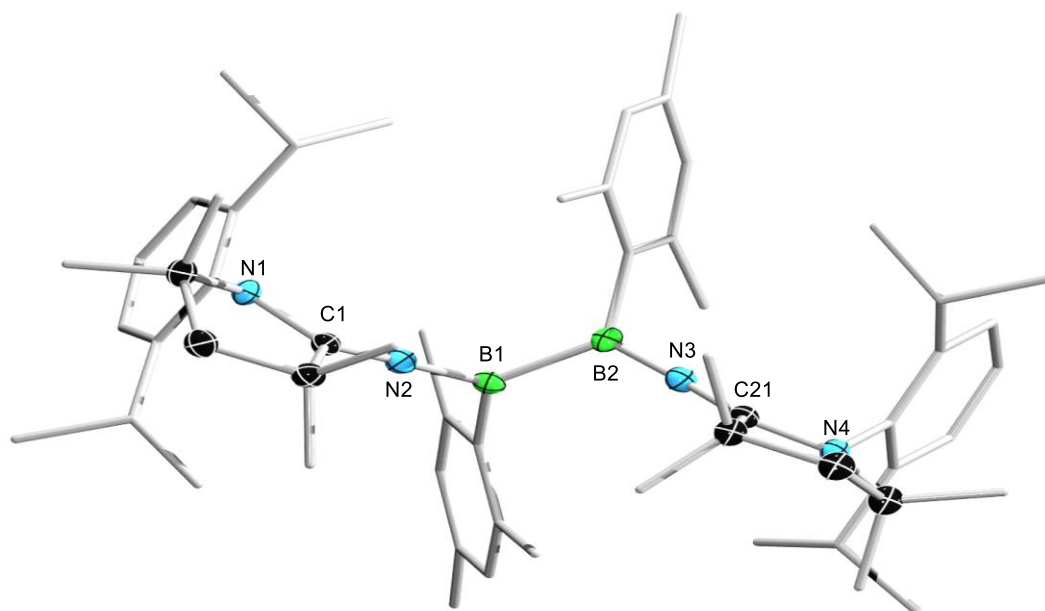

**Figure S61.** Solid-state structures of **5-Mes**. Atomic displacement ellipsoids shown at 50%. Ellipsoids of ligand periphery and hydrogen atoms omitted for clarity.



## Computational details

Density functional theory (DFT) calculations were carried out using the program Turbomole V7.2<sup>12</sup> implemented in the user interface TmoleX2022.<sup>13</sup> Geometry optimisations were carried out at the B3LYP<sup>14</sup>-D3(BJ)<sup>15</sup>/Def2-SVP<sup>16</sup> level of theory and minima were confirmed by the absence of negative frequencies. Wiberg bond indices (WBIs)<sup>17</sup> and partial charges, obtained by natural population analysis (NPA),<sup>18</sup> were calculated using TmoleX2022. Molecular orbital plots were generated within the TmoleX2022 orbital viewer.

NMR shielding calculations were performed on the structures of **2**<sup>Cl</sup>-**Y** (Y = Cl, NMe<sub>2</sub>, Dur) and **3**-**Y** (Y = Cl, NMe<sub>2</sub>, Dur) optimised at the B3LYP-D3(BJ)/Def2-SVP level of theory (see structural data in Table S2), using BF<sub>3</sub>(OEt<sub>2</sub>) ( $\delta_{11\text{B}} = 0$  ppm) as a reference and various levels of theory (functionals: B3LYP,  $\omega$ B97X-D,<sup>19</sup> LC<sup>20</sup>-TPSS,<sup>21</sup> basis sets: Def2-SVP, pcSseg-1/2;<sup>22</sup> solvent model: PCM(benzene)).<sup>23</sup> These calculations were carried out using Gaussian 16.<sup>24</sup> The results are summarised in Table S3 and show that the calculated <sup>11</sup>B NMR shifts and their relative order are highly dependent upon the level of theory used. The experimentally observed chemical shift order of Y = Dur > NMe<sub>2</sub> > Cl could only be reproduced for the **3**-**Y** series when using the pcsseg-1 basis set (highlighted in green in Table S3), albeit with a large upfield-shift of ca. 4 ppm for **3**-NMe<sub>2</sub> compared to the experimental value.

**Table S2.** Comparison of selected experimental and calculated (B3LYP-D3(BJ)/Def2-SVP) structural parameters for **2**<sup>Cl</sup>-**Y** (Y = Cl, NMe<sub>2</sub>, Dur) and **3**-**Y** (Y = NMe<sub>2</sub>, Dur).

|                                          | C=N        |        | B-N <sub>CAAI</sub> |        | C-N-B      |        |
|------------------------------------------|------------|--------|---------------------|--------|------------|--------|
|                                          | exp.       | calcd. | exp.                | calcd. | exp.       | calcd. |
| <b>2</b> <sup>Cl</sup> -Dur              | 1.270(2)   | 1.262  | 1.344(2)            | 1.357  | 168.51(15) | 169.87 |
| <b>2</b> <sup>Cl</sup> -NMe <sub>2</sub> | 1.271(2)   | 1.271  | 1.406(3)            | 1.403  | 139.30(15) | 138.33 |
| <b>2</b> <sup>Cl</sup> -Cl               | 1.276(2)   | 1.268  | 1.332(2)            | 1.356  | 155.78(15) | 154.06 |
| <b>3</b> -Ph                             | 1.275(3)   |        | 1.444(3)            |        | 132.57(19) |        |
|                                          | 1.266(3)   |        | 1.402(3)            |        | 154.0(2)   |        |
| <b>3</b> -NMe <sub>2</sub>               | 1.2636(18) | 1.259  | 1.427(2)            | 1.421  | 146.81(13) | 150.85 |
|                                          | 1.2694(19) | 1.270  | 1.455(2)            | 1.446  | 131.18(12) | 132.63 |

**Table S3.** Experimental and calculated  $^{11}\text{B}$  NMR shifts (ppm) of  $2^{\text{Cl}}\text{-Y}$  ( $\text{Y} = \text{Cl}, \text{NMe}_2, \text{Dur}$ ) and  $3\text{-Y}$  ( $\text{Y} = \text{Cl}, \text{NMe}_2, \text{Dur}$ ) optimised at the B3LYP-D3(BJ)-Def2-SVP level of theory. Highlighted in green are the results which reflect the experimental order of the NMR shifts.

|                                                    | $2^{\text{Cl}}\text{-Dur}$ | $2^{\text{Cl}}\text{-NMe}_2$ | $2^{\text{Cl}}\text{-Cl}$ | $3\text{-Ph}$ | $3\text{-NMe}_2$ | $3\text{-Cl}$ |
|----------------------------------------------------|----------------------------|------------------------------|---------------------------|---------------|------------------|---------------|
| exp.                                               | 30.4                       | 26.7                         | 24.8                      | 29.7          | 27.3             | 23.9          |
| B3LYP/Def2-SVP                                     | 30.99                      | 26.24                        | 28.67                     | 27.86         | 23.14            | 24.40         |
| $\omega\text{B97X-D/Def2-SVP}$                     | 30.25                      | 26.21                        | 28.28                     | 30.95         | 23.66            | 25.08         |
| $\omega\text{B97X-D/Def2-SVP/PCM}(\text{benzene})$ | 29.81                      | 26.20                        | 27.78                     | 31.04         | 23.85            | 24.95         |
| $\omega\text{B97X-D/pcSseg-1}$                     | 28.70                      | 26.12                        | 27.05                     | 29.27         | 23.49            | 23.28         |
| $\omega\text{B97X-D/pcSseg-1/PCM}(\text{benzene})$ | 28.24                      | 26.11                        | 26.50                     | 29.39         | 23.71            | 23.16         |
| $\omega\text{B97X-D/pcSseg-2}$                     | 29.73                      | 26.42                        | 28.27                     | 29.78         | 23.15            | 23.78         |
| $\omega\text{B97X-D/pcSseg-2/PCM}(\text{benzene})$ | 29.24                      | 26.37                        | 27.68                     | 29.86         | 23.34            | 23.60         |
| LC-TPSS/pcSseg-1                                   | 30.59                      | 28.16                        | 28.94                     | 32.30         | 25.76            | 25.51         |
| LC-TPSS/ pcSseg-1/PCM(benzene)                     | 30.11                      | 28.19                        | 28.40                     | 32.42         | 25.99            | 25.42         |

## Cartesian coordinates

**Table S4.** Cartesian coordinates (Å) of compounds optimized at the B3LYP-D3(BJ)/Def2-SVP level of theory, with SCF energies and lowest calculated IR frequencies.

### CAAI anion A

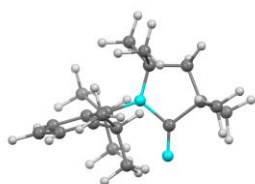

$E_{\text{SCF}} = -889.1654531288 \text{ Ha}$

Lowest IR frequency =  $48.07 \text{ cm}^{-1}$

|   |            |            |            |
|---|------------|------------|------------|
| N | 2.2406851  | 6.1742059  | 8.2312879  |
| C | 2.2304541  | 7.3979903  | 8.1504200  |
| N | 3.4043082  | 8.3287913  | 7.8728623  |
| C | 3.1010768  | 9.7510528  | 7.8599343  |
| C | 1.6609098  | 9.7848357  | 8.4591321  |
| H | 1.0735122  | 10.6131230 | 8.0233793  |
| H | 1.7415949  | 9.9847375  | 9.5404515  |
| C | 1.0245110  | 8.4050888  | 8.2539237  |
| C | 3.1351287  | 10.3761551 | 6.4434742  |
| H | 2.9021152  | 11.4548027 | 6.4860669  |
| H | 2.4063166  | 9.9016926  | 5.7727996  |
| H | 4.1356315  | 10.2614392 | 5.9962381  |
| C | 4.0585645  | 10.5861253 | 8.7349419  |
| H | 3.7615344  | 11.6498159 | 8.7249946  |
| H | 5.0946023  | 10.5174209 | 8.3651156  |
| H | 4.0468062  | 10.2417260 | 9.7785476  |
| C | 0.2201215  | 8.3050556  | 6.9484348  |
| H | -0.6773193 | 8.9531198  | 6.9660171  |
| H | -0.0942746 | 7.2590508  | 6.8043031  |
| H | 0.8246932  | 8.5874911  | 6.0726673  |
| C | 0.1385322  | 7.9666111  | 9.4198440  |
| H | -0.8268451 | 8.5064670  | 9.4463252  |
| H | 0.6513357  | 8.1231182  | 10.3838823 |
| H | -0.0347032 | 6.8826980  | 9.3150366  |
| C | 4.6792419  | 7.8141556  | 7.5824878  |
| C | 5.6062764  | 7.5733673  | 8.6315948  |
| C | 6.9015444  | 7.1369745  | 8.3230050  |

|   |           |           |             |
|---|-----------|-----------|-------------|
| H | 7.6205598 | 6.9677611 | 9.1297186   |
| C | 7.2777274 | 6.8798810 | 7.0042689   |
| H | 8.2953378 | 6.5474007 | 6.7754478   |
| C | 6.3298851 | 6.9940227 | 5.9874801   |
| H | 6.6013580 | 6.7139079 | 4.9655840   |
| C | 5.0257551 | 7.4303594 | 6.2598816   |
| C | 5.1435498 | 7.6343548 | 10.0782310  |
| H | 4.2151167 | 8.2186342 | 10.0856.969 |
| C | 6.1443460 | 8.3021592 | 11.0269055  |
| H | 5.7170827 | 8.3860371 | 12.0409358  |
| H | 6.4115403 | 9.3157075 | 10.6842847  |
| H | 7.0789309 | 7.7221461 | 11.1183684  |
| C | 4.7603686 | 6.2143575 | 10.5341611  |
| H | 4.3499167 | 6.2323286 | 11.5601254  |
| H | 5.6430382 | 5.5493574 | 10.5298500  |
| H | 3.9961848 | 5.8110144 | 9.8469456   |
| C | 3.9544274 | 7.3433909 | 5.1852115   |
| H | 3.1026297 | 7.9325650 | 5.5411295   |
| C | 3.4624111 | 5.8877194 | 5.0892439   |
| H | 2.6299376 | 5.8054954 | 4.3672391   |
| H | 3.1091103 | 5.5632172 | 6.0830691   |
| H | 4.2753620 | 5.2193794 | 4.7520240   |
| C | 4.3875095 | 7.9006244 | 3.8249053   |
| H | 3.5428668 | 7.8818936 | 3.1149650   |
| H | 5.2012567 | 7.3066857 | 3.3742340   |
| H | 4.7393569 | 8.9423447 | 3.9072412   |

### NHI anion B

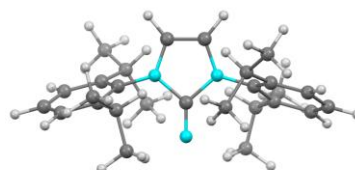

$E_{\text{SCF}} = -1212.596915069 \text{ Ha}$

Lowest IR frequency =  $37.93 \text{ cm}^{-1}$

|   |           |           |           |
|---|-----------|-----------|-----------|
| N | 1.8862490 | 6.2993632 | 7.6020850 |
|---|-----------|-----------|-----------|

C 2.0747409 7.4707964 7.8972556  
 N 3.3053094 8.3093601 7.8322035  
 C 3.0818133 9.5973757 8.2903317  
 C 1.7761903 9.7238414 8.6215452  
 N 1.1459231 8.5049465 8.4320716  
 C 4.5686475 7.7674961 7.5649620  
 C 5.4565185 7.5055404 8.6335741  
 C 6.7289013 7.0076048 8.3467574  
 H 7.4299767 6.8081990 9.1610229  
 C 7.1059143 6.7270185 7.0347779  
 H 8.1027986 6.3281068 6.8255331  
 C 6.2050456 6.9332348 5.9966123  
 H 6.4971420 6.6868865 4.9718832  
 C 4.9300783 7.4557979 6.2387594  
 C 4.9534486 7.6397274 10.0568248  
 H 4.2538937 8.4907917 10.0806692  
 C 6.0457580 7.9161445 11.0830071  
 H 5.5982071 8.0948553 12.0735510  
 H 6.6453729 8.8007166 10.8146337  
 H 6.7353081 7.0626042 11.1929695  
 C 4.1502995 6.3840582 10.4154093  
 H 3.6506023 6.5029955 11.3918700  
 H 4.8198176 5.5093576 10.4776775  
 H 3.3878593 6.1679904 9.6483758  
 C 3.9443302 7.6517571 5.1077542  
 H 3.1342475 8.2761046 5.5143721  
 C 3.3227953 6.3102121 4.7159625  
 H 2.5563626 6.4524028 3.9351665  
 H 2.8456289 5.8730814 5.6122541  
 H 4.0904087 5.6217523 4.3199698  
 C 4.5515979 8.3825341 3.9125727  
 H 3.7756890 8.5883942 3.1573737  
 H 5.3344762 7.7842386 3.4169453  
 H 5.0019449 9.3431101 4.2101667  
 C -0.2366072 8.3006147 8.5178744  
 C -1.0843268 8.8464313 7.5265725  
 C -2.4642138 8.6727897 7.6483581  
 C -2.9995680 7.9331317 8.7013997  
 C -2.1538594 7.3510088 9.6383561  
 C -0.7671770 7.5245383 9.5678665  
 C -0.4631779 9.4786544 6.2968969

H -3.1328672 9.0969690 6.8953415  
 H -4.0820371 7.7960058 8.7789016  
 H -2.5775590 6.7496645 10.4477561  
 C 0.1484100 6.8675413 10.5773785  
 H 1.1368508 7.3320007 10.4404783  
 C -0.2915709 7.1077406 12.0193614  
 C 0.3034602 5.3805495 10.2557668  
 C -0.0365125 8.3651232 5.3330833  
 C -1.3513625 10.5059860 5.6054165  
 H 0.4535467 9.9976248 6.6205136  
 H -0.9257809 7.8611610 4.9182877  
 H 0.5481612 8.7759266 4.4924705  
 H 0.5701119 7.6023977 5.8495685  
 H -0.6632691 4.8547916 10.3479912  
 H 0.6912153 5.2879889 9.2249921  
 H 1.0178646 4.9064736 10.9502452  
 H -0.4045644 8.1821135 12.2359401  
 H -1.2536835 6.6175963 12.2449350  
 H 0.4534920 6.6948832 12.7188410  
 H -1.6868246 11.2913874 6.3016103  
 H -2.2485035 10.0434499 5.1613489  
 H -0.8010321 10.9906661 4.7834804  
 H 1.2462338 10.5945373 9.0029572  
 H 3.8744807 10.3420962 8.3281042

### SNHI anion C

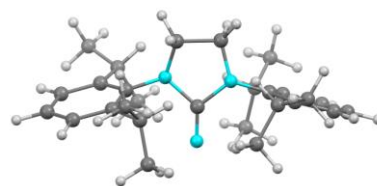

$E_{\text{SCF}} = -1214.492310168 \text{ Ha}$

Lowest IR frequency =  $38.78 \text{ cm}^{-1}$

N 1.8850060 6.3406618 7.5993208  
 C 2.0741197 7.5151403 7.8822094  
 N 3.3439282 8.2402300 8.1827169  
 C 3.1724081 9.6686723 8.2304487  
 C 1.6914744 9.8130936 8.6146951  
 N 1.1012361 8.6384706 8.0278351  
 C 4.5801795 7.7126404 7.7474856  
 C 5.5029500 7.2747504 8.7298497  
 C 6.7571872 6.8007642 8.3295660

H 7.4790492 6.4666380 9.0785575  
 C 7.0910563 6.7297625 6.9744679  
 H 8.0736308 6.3551739 6.6706828  
 C 6.1611722 7.1139934 6.0107858  
 H 6.4155995 7.0220935 4.9509828  
 C 4.8980104 7.6064663 6.3747929  
 C 5.0462220 7.2316276 10.1793603  
 H 4.3946535 8.1057151 10.3302934  
 C 6.1813530 7.2985425 11.2045148  
 H 5.7691563 7.3623312 12.2255258  
 H 6.8301269 8.1754425 11.0420641  
 H 6.8187286 6.3983376 11.1717221  
 C 4.1685091 5.9822926 10.3866459  
 H 3.6900904 5.9982517 11.3815613  
 H 4.7866935 5.0696343 10.3183770  
 H 3.3870994 5.9184607 9.6108122  
 C 3.8769514 7.9445081 5.2982171  
 H 3.0260505 8.4333956 5.7894727  
 C 3.3351910 6.6488140 4.6729184  
 H 2.5575708 6.8745653 3.9235680  
 H 2.8898393 6.0358636 5.4736705  
 H 4.1415699 6.0842054 4.1712657  
 C 4.4248082 8.9147801 4.2426092  
 H 3.6312846 9.1911274 3.5277462  
 H 5.2490957 8.4688223 3.6597348  
 H 4.8065573 9.8404102 4.7052158  
 C -0.2635556 8.3650507 8.2701880  
 C -1.2021576 8.7077949 7.2655207  
 C -2.5657530 8.5021030 7.5024879  
 C -3.0014319 7.9375407 8.7043459  
 C -2.0705071 7.5546172 9.6675544  
 C -0.6953594 7.7565582 9.4702027  
 C -0.6772915 9.1814704 5.9196739  
 H -3.2989719 8.7681932 6.7374693  
 H -4.0701640 7.7784091 8.8794395  
 H -2.4158941 7.0795216 10.5903040  
 C 0.3008114 7.2558397 10.5053893  
 H 1.2918166 7.6318987 10.2210156  
 C -0.0032790 7.7682046 11.9200461  
 C 0.3829823 5.7220045 10.4458227  
 C -0.2004955 7.9578746 5.1141062

C -1.6651981 10.0327966 5.1175524  
 H 0.2144282 9.7923036 6.1272835  
 H -1.0657366 7.3397267 4.8155410  
 H 0.3282946 8.2721839 4.1971308  
 H 0.4706339 7.3271995 5.7204597  
 H -0.5894334 5.2629334 10.6995450  
 H 0.6813796 5.4293799 9.4258770  
 H 1.1362614 5.3454537 11.1586847  
 H -0.0525421 8.8697347 11.9475923  
 H -0.9636738 7.3810714 12.3013350  
 H 0.7826558 7.4434362 12.6231127  
 H -2.0325314 10.8945061 5.6998529  
 H -2.5432068 9.4483286 4.7926974  
 H -1.1815917 10.4181926 4.2043039  
 H 1.5810354 9.8486263 9.7237209  
 H 3.8355685 10.1526078 8.9732365  
 H 3.3680297 10.1640518 7.2509097  
 H 1.2571225 10.7510502 8.2185452

#### CAAI-BH<sub>2</sub>, D

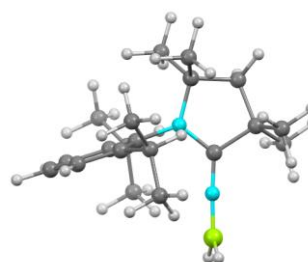

$E_{SCF} = -915.2439858111$  Ha

Lowest IR frequency = 41.48 cm<sup>-1</sup>

N 2.235739 6.216919 8.151518  
 C 2.248779 7.474750 8.107594  
 N 3.348957 8.258322 7.844070  
 C 3.063836 9.720448 7.829457  
 C 1.659292 9.767454 8.480873  
 H 1.038605 10.566519 8.048965  
 H 1.772303 9.986306 9.553581  
 C 1.021276 8.371050 8.313113  
 C 3.060179 10.291613 6.402117  
 H 2.827460 11.367067 6.434371  
 H 2.314918 9.803470 5.760923  
 H 4.048100 10.174705 5.934141  
 C 4.088120 10.510960 8.651322

H 3.838879 11.582486 8.612904  
 H 5.104175 10.384023 8.248554  
 H 4.090619 10.202487 9.704254  
 C 0.119801 8.268530 7.069680  
 H -0.755517 8.929450 7.176070  
 H -0.237413 7.235374 6.943423  
 H 0.652341 8.553049 6.150467  
 C 0.238125 7.937212 9.556214  
 H -0.622929 8.605014 9.720289  
 H 0.873091 7.964137 10.455806  
 H -0.137200 6.909424 9.438882  
 C 4.635891 7.688451 7.581328  
 C 5.519832 7.456165 8.662145  
 C 6.798165 6.955285 8.383267  
 H 7.495455 6.775970 9.204775  
 C 7.187155 6.661316 7.078140  
 H 8.190540 6.275854 6.879173  
 C 6.281696 6.824771 6.032866  
 H 6.575012 6.543728 5.018934  
 C 4.990864 7.321056 6.262090  
 C 5.095165 7.638941 10.112623  
 H 4.124069 8.150840 10.110333  
 C 6.080380 8.495045 10.920995  
 H 5.685458 8.682873 11.932669  
 H 6.266814 9.467505 10.440232  
 H 7.052668 7.990377 11.039644  
 C 4.877206 6.269680 10.779219  
 H 4.514854 6.396601 11.812958  
 H 5.817779 5.696412 10.819597  
 H 4.139158 5.672715 10.225538  
 C 3.995485 7.346249 5.110943  
 H 3.087097 7.844573 5.468829  
 C 3.594612 5.912687 4.721904  
 H 2.827606 5.929137 3.929723  
 H 3.186606 5.367776 5.584317  
 H 4.460681 5.348478 4.338584  
 C 4.511554 8.120404 3.889663  
 H 3.727091 8.190198 3.118451  
 H 5.377924 7.618073 3.430352  
 H 4.822107 9.143222 4.152330  
 B 2.146784 4.861762 8.234118

H 2.341554 4.297942 9.293216  
 H 1.878083 4.203393 7.248272

### NH-BH<sub>2</sub>, D

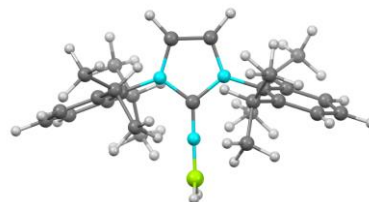

$E_{\text{SCF}} = -1239.349164150 \text{ Ha}$

Lowest IR frequency =  $35.37 \text{ cm}^{-1}$

N 1.886954 6.323435 7.599673  
 C 2.083358 7.531066 7.908955  
 N 3.298425 8.214783 7.951938  
 C 3.085471 9.543406 8.339015  
 C 1.758543 9.704703 8.547836  
 N 1.132918 8.479928 8.285430  
 C 4.551274 7.627419 7.604716  
 C 5.381386 7.138102 8.636556  
 C 6.602614 6.559760 8.270061  
 H 7.271198 6.172513 9.040667  
 C 6.975084 6.463033 6.927849  
 H 7.928610 5.999727 6.661340  
 C 6.136317 6.948854 5.926970  
 H 6.438533 6.864755 4.880551  
 C 4.906818 7.543075 6.244955  
 C 4.926661 7.188550 10.089191  
 H 4.248182 8.049821 10.191227  
 C 6.076324 7.397388 11.081253  
 H 5.676042 7.550832 12.095901  
 H 6.688091 8.274618 10.817540  
 H 6.743024 6.521177 11.128106  
 C 4.116880 5.926621 10.439023  
 H 3.728472 5.988102 11.468906  
 H 4.752292 5.028607 10.366877  
 H 3.267470 5.788365 9.756468  
 C 3.995343 8.066258 5.144942  
 H 3.114799 8.514627 5.626591  
 C 3.492930 6.924980 4.248136  
 H 2.783893 7.308881 3.496773  
 H 2.978744 6.155159 4.840747

H 4.325855 6.444053 3.709374  
 C 4.678023 9.172400 4.326679  
 H 3.981251 9.584698 3.578655  
 H 5.558532 8.790607 3.784287  
 H 5.014362 9.998391 4.973178  
 C -0.259753 8.199090 8.416424  
 C -1.121521 8.523420 7.346442  
 C -2.483107 8.234318 7.496703  
 C -2.964088 7.637936 8.664121  
 C -2.092268 7.318830 9.703067  
 C -0.721065 7.593875 9.601119  
 C -0.567852 9.105196 6.052442  
 H -3.178540 8.469340 6.689330  
 H -4.030431 7.417933 8.761278  
 H -2.480923 6.848291 10.609254  
 C 0.224145 7.233772 10.737312  
 H 1.233433 7.556838 10.445871  
 C -0.137135 7.983265 12.028508  
 C 0.277639 5.714498 10.958200  
 C -0.150183 7.972973 5.096068  
 C -1.526953 10.083067 5.363962  
 H 0.343022 9.668341 6.309032  
 H -1.028826 7.379156 4.794957  
 H 0.311654 8.386156 4.184324  
 H 0.567663 7.287766 5.568124  
 H -0.700464 5.321871 11.281933  
 H 0.568644 5.192789 10.035143  
 H 1.013997 5.465037 11.739019  
 H -0.147954 9.073212 11.869202  
 H -1.131690 7.689092 12.401770  
 H 0.594995 7.760149 12.821609  
 H -1.865603 10.873774 6.052194  
 H -2.420402 9.573629 4.967828  
 H -1.025772 10.563972 4.509110  
 H 1.185375 10.571707 8.860843  
 H 3.911643 10.242210 8.424150  
 B 1.680804 5.018089 7.268810  
 H 1.709388 4.146963 8.120853  
 H 1.462974 4.694489 6.114440

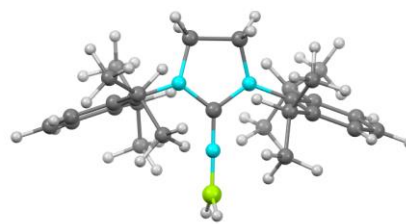

$E_{\text{SCF}} = -1240.559419284 \text{ Ha}$

Lowest IR frequency =  $42.18 \text{ cm}^{-1}$

N 1.886639 6.373508 7.598561  
 C 2.084913 7.579523 7.895975  
 N 3.318933 8.195271 8.067634  
 C 3.166978 9.638717 8.202235  
 C 1.701428 9.771733 8.639355  
 N 1.110787 8.546492 8.114854  
 C 4.544480 7.595091 7.654103  
 C 5.414603 7.101399 8.651768  
 C 6.622910 6.522086 8.247327  
 H 7.314109 6.129467 8.994946  
 C 6.953971 6.432390 6.893915  
 H 7.900267 5.974236 6.594631  
 C 6.082024 6.921454 5.923744  
 H 6.351098 6.842034 4.867795  
 C 4.862417 7.513243 6.283046  
 C 5.002214 7.150972 10.116312  
 H 4.361144 8.038010 10.239539  
 C 6.181635 7.294607 11.083640  
 H 5.812700 7.451800 12.109695  
 H 6.826918 8.146537 10.816845  
 H 6.808416 6.388453 11.103096  
 C 4.143344 5.923131 10.468817  
 H 3.779611 5.986440 11.507752  
 H 4.734958 4.998062 10.370186  
 H 3.274670 5.835796 9.802457  
 C 3.926979 8.041512 5.204194  
 H 3.027039 8.434795 5.696502  
 C 3.462890 6.922335 4.260667  
 H 2.735959 7.312097 3.529865  
 H 2.980344 6.110201 4.822077  
 H 4.308911 6.496354 3.697350  
 C 4.567576 9.203241 4.428409  
 H 3.857046 9.618187 3.694755  
 H 5.461716 8.872473 3.875049

**SNHI-BH<sub>2</sub>, F**

H 4.877329 10.015847 5.104633  
 C -0.266261 8.226677 8.301281  
 C -1.167518 8.527835 7.255778  
 C -2.521276 8.225495 7.442750  
 C -2.964650 7.638752 8.629664  
 C -2.060983 7.345305 9.648429  
 C -0.695971 7.634061 9.506291  
 C -0.651517 9.108025 5.946266  
 H -3.240629 8.444280 6.651953  
 H -4.025129 7.406623 8.758288  
 H -2.420306 6.882127 10.570533  
 C 0.272352 7.304651 10.633926  
 H 1.283635 7.581389 10.305670  
 C -0.038807 8.124950 11.895761  
 C 0.299332 5.798691 10.934132  
 C -0.178995 7.978794 5.013095  
 C -1.657312 10.022732 5.239473  
 H 0.234363 9.714637 6.191730  
 H -1.026907 7.335012 4.727119  
 H 0.261584 8.393205 4.091206  
 H 0.571961 7.342250 5.500290  
 H -0.675843 5.445342 11.307298  
 H 0.550692 5.223156 10.032013  
 H 1.053965 5.574111 11.704948  
 H -0.034092 9.206379 11.684893  
 H -1.030527 7.871658 12.304844  
 H 0.707175 7.924531 12.682130  
 H -2.035064 10.810079 5.911180  
 H -2.524552 9.461123 4.855682  
 H -1.181874 10.509829 4.373329  
 H 1.610168 9.822096 9.741395  
 H 3.870366 10.046400 8.944229  
 H 3.350571 10.153698 7.239792  
 H 1.211798 10.662925 8.217937  
 B 1.660952 5.068779 7.276272  
 H 1.598866 4.218609 8.144202  
 H 1.519510 4.734102 6.115576

**2<sup>Cl</sup>-Cl**

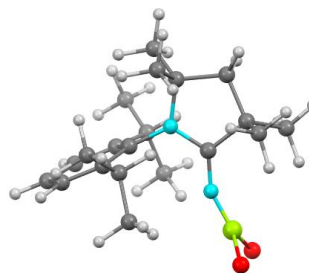

$E_{SCF} = -1834.17565305554 \text{ Ha}$

Lowest IR frequency =  $37.84 \text{ cm}^{-1}$

N 2.269053 6.231719 8.150483  
 B 1.686328 5.013097 8.270466  
 C 2.262328 7.499223 8.100691  
 N 3.349497 8.274135 7.838636  
 C 3.065102 9.739918 7.821368  
 C 1.653123 9.786693 8.458043  
 H 1.031793 10.574131 8.006800  
 H 1.752200 10.021901 9.528520  
 C 1.028301 8.382921 8.301564  
 C 3.078586 10.301321 6.391666  
 H 2.851554 11.377969 6.417124  
 H 2.336265 9.813737 5.746656  
 H 4.070160 10.176294 5.933691  
 C 4.083943 10.525557 8.652864  
 H 3.835694 11.597136 8.613397  
 H 5.102986 10.397797 8.258394  
 H 4.076782 10.215686 9.705339  
 C 0.131862 8.255561 7.055019  
 H -0.760162 8.892862 7.163596  
 H -0.196077 7.213825 6.921953  
 H 0.658035 8.558894 6.138141  
 C 0.248635 7.949821 9.547914  
 H -0.599285 8.631515 9.720914  
 H 0.889398 7.958340 10.443425  
 H -0.150352 6.931222 9.430704  
 C 4.640177 7.702722 7.580898  
 C 5.517243 7.474879 8.666978  
 C 6.798641 6.979939 8.391857  
 H 7.493310 6.802413 9.215778  
 C 7.193312 6.688461 7.087835  
 H 8.199320 6.308187 6.892488  
 C 6.290440 6.844994 6.039258  
 H 6.587610 6.562209 5.027086



C 4.996075 7.334304 6.263340  
 C 5.084030 7.648981 10.116055  
 H 4.112314 8.160076 10.114502  
 C 6.064045 8.501809 10.934286  
 H 5.663123 8.683270 11.944632  
 H 6.252982 9.477166 10.460218  
 H 7.035788 7.997009 11.056004  
 C 4.864728 6.274787 10.772558  
 H 4.502148 6.395457 11.806847  
 H 5.805572 5.701845 10.809442  
 H 4.123873 5.681225 10.219934  
 C 4.000192 7.341677 5.112370  
 H 3.086474 7.835771 5.463341  
 C 3.612216 5.900125 4.740353  
 H 2.840541 5.899627 3.952901  
 H 3.207967 5.361351 5.607331  
 H 4.482747 5.341013 4.359963  
 C 4.509460 8.107263 3.883008  
 H 3.724714 8.159800 3.110867  
 H 5.380769 7.608126 3.429837  
 H 4.809776 9.136243 4.133524  
 Cl 0.895909 4.205079 6.871646  
 Cl 1.715623 4.099082 9.813836

**2<sup>Cl</sup>-NMe<sub>2</sub>**

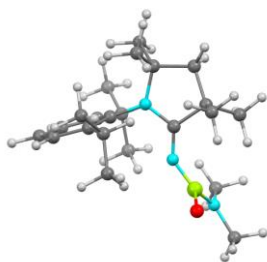

$E_{\text{SCF}} = -1508.559911158 \text{ Ha}$

Lowest IR frequency =  $39.31 \text{ cm}^{-1}$

B 14.987309 3.617760 2.696297  
 Cl 16.078369 2.168043 2.936988  
 N 15.506454 4.723735 1.978751  
 C 16.814434 4.795007 1.360730  
 H 16.729319 4.996076 0.275656  
 H 17.358023 3.853580 1.498585  
 H 17.417982 5.613857 1.798246  
 C 14.731775 5.939260 1.826936

H 14.590964 6.194623 0.759551  
 H 15.237298 6.799388 2.307542  
 H 13.743253 5.819095 2.283248  
 N 11.731891 3.340551 4.460301  
 C 13.054835 3.656198 4.280932  
 C 13.626907 4.156496 5.616989  
 C 12.352459 4.485322 6.420682  
 H 12.470907 4.289526 7.496672  
 H 12.119822 5.555373 6.307345  
 C 11.196272 3.652433 5.814268  
 C 14.451715 3.021972 6.256066  
 H 13.848206 2.117723 6.418491  
 H 14.844853 3.348278 7.232526  
 H 15.297400 2.744374 5.610838  
 C 14.516249 5.388350 5.423131  
 H 15.409000 5.145148 4.828441  
 H 14.853683 5.770532 6.400014  
 H 13.975302 6.195752 4.905942  
 C 10.902137 2.380441 6.623985  
 H 10.151475 1.760791 6.112774  
 H 10.499387 2.655453 7.611011  
 H 11.800251 1.770397 6.784883  
 C 9.904910 4.475253 5.736568  
 H 10.061433 5.423925 5.206116  
 H 9.557711 4.709107 6.754920  
 H 9.106910 3.917224 5.224392  
 N 13.673600 3.522892 3.178595  
 C 10.952332 2.677636 3.456655  
 C 10.179336 3.443368 2.553666  
 C 9.326521 2.773251 1.666316  
 H 8.715248 3.351516 0.969796  
 C 9.266101 1.381790 1.640517  
 H 8.589987 0.874411 0.947560  
 C 10.103177 0.638770 2.469773  
 H 10.097735 -0.451194 2.402073  
 C 10.970697 1.265094 3.375278  
 C 10.347640 4.949941 2.424641  
 H 10.970015 5.286147 3.264900  
 C 11.978992 0.418723 4.139217  
 H 12.472364 1.066683 4.872764  
 C 11.124393 5.260989 1.132643

H 10.532612 4.990784 0.242609  
H 12.063904 4.692332 1.103942  
H 11.360568 6.336158 1.066773  
C 9.022038 5.721743 2.470214  
H 9.209085 6.807495 2.442677  
H 8.447956 5.496809 3.381436  
H 8.383882 5.478873 1.605672  
C 13.072140 -0.075507 3.175836  
H 12.652755 -0.763206 2.422507  
H 13.859753 -0.613949 3.727565  
H 13.543511 0.767785 2.654637  
C 11.341872 -0.752391 4.898587  
H 10.901762 -1.490939 4.209484  
H 10.546147 -0.416941 5.580865  
H 12.103570 -1.279278 5.495875

**2<sup>Cl</sup>-Dur**

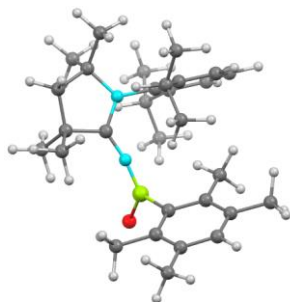

$E_{SCF} = -1762.55593278544$  Ha

Lowest IR frequency = 35.52 cm<sup>-1</sup>

N 5.474528 9.392200 3.440038  
C 3.261972 10.640513 3.945431  
B 4.118031 9.414028 3.449668  
Cl 3.228476 7.913105 2.896830  
N 7.674704 9.070790 4.155255  
C 6.714078 9.324894 3.214370  
C 9.044372 8.916577 3.584296  
C 8.870152 9.577736 2.193963  
H 9.186852 10.629938 2.258333  
H 9.499367 9.092690 1.433489  
C 7.366877 9.518083 1.841699  
C 10.103631 9.628379 4.429425  
H 10.135876 9.221511 5.451309  
H 9.921984 10.708223 4.491930  
H 11.093823 9.478537 3.972479

C 9.440524 7.435813 3.461381  
H 9.532333 6.969906 4.451700  
H 10.416460 7.354693 2.958273  
H 8.708453 6.861606 2.877705  
C 6.995018 8.326697 0.940608  
H 5.902383 8.258258 0.829636  
H 7.345690 7.371297 1.356897  
H 7.443689 8.450254 -0.058016  
C 6.869172 10.821823 1.205679  
H 7.061916 11.684230 1.862739  
H 5.787009 10.773787 1.020576  
H 7.378457 10.996828 0.244150  
C 7.352945 9.052022 5.552503  
C 7.348818 10.280869 6.258490  
C 7.058049 10.259696 7.628109  
H 7.055231 11.196446 8.189249  
C 6.752483 9.067380 8.282045  
H 6.528232 9.070965 9.351703  
C 6.702513 7.877187 7.562284  
H 6.422314 6.952195 8.071241  
C 6.986314 7.845453 6.189056  
C 6.824939 6.532940 5.436255  
H 7.101304 6.715022 4.390648  
C 7.574951 11.622220 5.571910  
H 7.936470 11.419501 4.555071  
C 7.744231 5.433802 5.991628  
H 7.446972 5.142963 7.012139  
H 8.795051 5.758883 6.035839  
H 7.690933 4.530491 5.362633  
C 5.359678 6.067031 5.439377  
H 5.003374 5.871438 6.463935  
H 5.256210 5.132291 4.864724  
H 4.696967 6.811644 4.979297  
C 6.251402 12.391746 5.427851  
H 5.816048 12.623055 6.413959  
H 5.508326 11.814361 4.863746  
H 6.415679 13.347210 4.902769  
C 8.634482 12.477170 6.282360  
H 9.576162 11.925636 6.428111  
H 8.287262 12.810462 7.273180  
H 8.853193 13.382591 5.693410

C 2.749513 11.574530 3.021191  
 C 2.051581 12.708723 3.483601  
 C 1.872780 12.873023 4.861101  
 H 1.332046 13.754041 5.221870  
 C 2.355283 11.949365 5.793850  
 C 3.058639 10.818815 5.330947  
 C 2.944158 11.379488 1.536021  
 H 3.399137 10.406414 1.306698  
 H 3.587253 12.165873 1.102837  
 H 1.985369 11.425709 0.993643  
 C 1.507219 13.730343 2.517305  
 H 1.012762 14.558039 3.046996  
 H 0.769890 13.286309 1.825992  
 H 2.303554 14.162002 1.886618  
 C 2.133585 12.168318 7.268948  
 H 3.089429 12.237109 7.816718  
 H 1.575320 11.333450 7.726188  
 H 1.569167 13.093830 7.456153  
 C 3.583098 9.817162 6.330827  
 H 2.759756 9.344702 6.893596  
 H 4.243993 10.292459 7.073062  
 H 4.165046 9.017897 5.856124

### 3-Cl

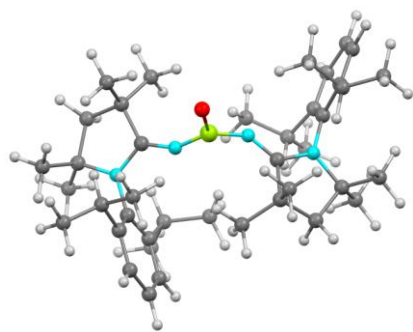

$E_{\text{SCF}} = -2263.37993891577 \text{ Ha}$

Lowest IR frequency =  $31.91 \text{ cm}^{-1}$

B 10.504509 8.734680 4.769188  
 N 9.581847 7.717258 4.933925  
 N 10.410633 9.774757 3.835632  
 C 8.724887 7.074493 5.603017  
 N 8.231109 5.849633 5.226772  
 C 7.239746 5.268163 6.171210  
 C 6.914573 6.493428 7.064644  
 H 6.724964 6.194118 8.106120

H 5.996870 6.973301 6.690655  
 C 8.092008 7.483600 6.938354  
 C 7.832822 4.101166 6.976774  
 H 8.125412 3.278926 6.308560  
 H 7.078256 3.713936 7.678882  
 H 8.712545 4.402578 7.559601  
 C 5.989503 4.755508 5.447807  
 H 5.469503 5.560598 4.913139  
 H 5.288720 4.332126 6.183822  
 H 6.243832 3.963895 4.727106  
 C 9.149208 7.303933 8.045588  
 H 9.509158 6.266585 8.104667  
 H 8.719786 7.572707 9.024234  
 H 10.021408 7.945702 7.853547  
 C 7.629768 8.942976 6.902776  
 H 8.481547 9.618362 6.733649  
 H 7.158247 9.218049 7.860143  
 H 6.900792 9.112019 6.096275  
 C 10.842760 11.154126 0.523762  
 C 11.252517 9.672983 0.313163  
 H 10.406332 9.125485 -0.129321  
 H 12.100351 9.582537 -0.382428  
 C 10.749612 9.989598 2.631865  
 N 10.482906 11.162280 1.966636  
 C 11.562163 9.075235 1.700920  
 C 9.638095 11.524028 -0.351011  
 H 9.921812 11.474423 -1.413946  
 H 9.292451 12.547045 -0.138366  
 H 8.799004 10.834150 -0.189235  
 C 13.049430 9.212412 2.088830  
 H 13.669431 8.587118 1.425992  
 H 13.205384 8.885486 3.127423  
 H 13.405950 10.249014 2.008824  
 C 11.157667 7.601877 1.797723  
 H 10.089489 7.455296 1.595787  
 H 11.360197 7.189881 2.795633  
 H 11.730396 7.008337 1.067306  
 C 11.985691 12.129924 0.201659  
 H 12.190040 12.114003 -0.879834  
 H 12.915433 11.870078 0.723360  
 H 11.709891 13.158031 0.479349

C 8.702064 5.216189 4.030721  
 C 8.030721 5.461702 2.809239  
 C 8.490912 4.820047 1.651801  
 H 7.979118 4.995025 0.702781  
 C 9.604436 3.984270 1.684979  
 H 9.947979 3.490505 0.772274  
 C 10.298404 3.808135 2.879175  
 H 11.200089 3.191709 2.891029  
 C 9.875821 4.427125 4.063982  
 C 6.890510 6.463467 2.684575  
 H 6.623497 6.794110 3.696806  
 C 5.638747 5.855036 2.035197  
 H 4.805576 6.576310 2.055860  
 H 5.313173 4.940519 2.553171  
 H 5.818486 5.593463 0.979996  
 C 7.352700 7.714598 1.918706  
 H 7.708112 7.454627 0.908240  
 H 8.166439 8.220436 2.455508  
 H 6.520121 8.426387 1.804552  
 C 10.745769 4.296702 5.306221  
 H 10.229933 4.804334 6.129313  
 C 12.086984 5.021867 5.106993  
 H 12.668286 4.568774 4.287175  
 H 12.694314 4.962624 6.024529  
 H 11.933811 6.084636 4.881179  
 C 10.971408 2.833880 5.716469  
 H 11.564706 2.291373 4.962664  
 H 10.022132 2.291929 5.843556  
 H 11.525335 2.782513 6.667778  
 C 9.957457 12.314724 2.635891  
 C 8.560534 12.516168 2.705619  
 C 8.083075 13.710478 3.263319  
 H 7.005932 13.885330 3.313282  
 C 8.956979 14.662942 3.781815  
 H 8.567236 15.591300 4.207648  
 C 10.326321 14.406831 3.797300  
 H 11.003288 15.126328 4.262810  
 C 10.849458 13.229749 3.245558  
 C 7.567525 11.425137 2.333800  
 H 8.121779 10.628855 1.820937  
 C 6.998059 10.814055 3.626538

H 6.464454 11.573685 4.220994  
 H 7.812659 10.403374 4.238297  
 H 6.287970 10.003766 3.399095  
 C 6.449408 11.903955 1.399682  
 H 6.852652 12.363352 0.484413  
 H 5.799203 12.647307 1.888811  
 H 5.809397 11.056838 1.103476  
 C 12.326827 12.916357 3.428252  
 H 12.563308 12.056787 2.792620  
 C 12.591247 12.479697 4.880184  
 H 13.646804 12.188227 5.009480  
 H 11.968044 11.616813 5.151778  
 H 12.376266 13.301031 5.583786  
 C 13.250877 14.069265 3.016005  
 H 13.056570 14.400046 1.983875  
 H 14.305259 13.755107 3.080633  
 H 13.132402 14.944061 3.675612  
 Cl 12.003087 8.720970 5.855941

### 3-NMe<sub>2</sub>

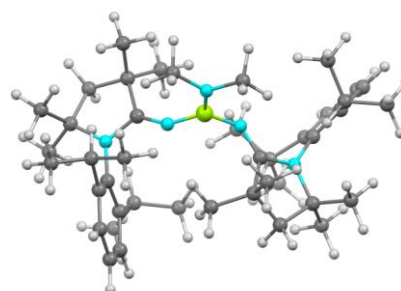

$E_{\text{SCF}} = -1937.74667396460 \text{ Ha}$

Lowest IR frequency =  $30.93 \text{ cm}^{-1}$

B 10.750657 8.679012 4.957777  
 N 9.799776 7.626385 5.039956  
 N 10.542568 9.786112 4.051618  
 C 12.187469 7.635101 6.787321  
 H 11.417494 6.856698 6.763331  
 H 12.185906 8.090462 7.799337  
 H 13.171319 7.144034 6.660362  
 N 11.956856 8.613432 5.751987  
 C 13.014708 9.590690 5.663930  
 H 12.811972 10.296597 4.854449  
 H 13.995460 9.111112 5.470111  
 H 13.121315 10.170272 6.603317

|   |           |           |           |   |           |           |           |
|---|-----------|-----------|-----------|---|-----------|-----------|-----------|
| C | 8.837794  | 7.056496  | 5.618021  | H | 11.594288 | 6.916837  | 1.210570  |
| N | 8.300013  | 5.847589  | 5.196424  | C | 12.071990 | 11.973177 | 0.359675  |
| C | 7.335984  | 5.250608  | 6.153325  | H | 12.332182 | 11.896317 | -0.707394 |
| C | 6.905472  | 6.497601  | 6.959725  | H | 12.958291 | 11.699428 | 0.946093  |
| H | 6.649665  | 6.240915  | 7.998721  | H | 11.828101 | 13.024133 | 0.571821  |
| H | 6.001069  | 6.920932  | 6.496350  | C | 8.713560  | 5.233236  | 3.972430  |
| C | 8.055765  | 7.524210  | 6.866646  | C | 7.970071  | 5.497240  | 2.795647  |
| C | 8.010158  | 4.197610  | 7.050161  | C | 8.343863  | 4.863860  | 1.603518  |
| H | 8.345574  | 3.337771  | 6.454077  | H | 7.774385  | 5.057924  | 0.691865  |
| H | 7.296269  | 3.828446  | 7.803291  | C | 9.441389  | 4.008188  | 1.555893  |
| H | 8.880860  | 4.607625  | 7.579364  | H | 9.717592  | 3.518681  | 0.618384  |
| C | 6.144748  | 4.587794  | 5.455773  | C | 10.203135 | 3.805302  | 2.702751  |
| H | 5.565113  | 5.306474  | 4.863045  | H | 11.089628 | 3.168872  | 2.652113  |
| H | 5.472227  | 4.157331  | 6.213805  | C | 9.868664  | 4.418950  | 3.918562  |
| H | 6.472865  | 3.774033  | 4.791471  | C | 6.835914  | 6.512191  | 2.756361  |
| C | 8.961773  | 7.513982  | 8.107875  | H | 6.606211  | 6.794915  | 3.792098  |
| H | 9.420878  | 6.530644  | 8.284873  | C | 5.556375  | 5.950628  | 2.119314  |
| H | 8.375902  | 7.781743  | 9.002079  | H | 4.728866  | 6.671385  | 2.221380  |
| H | 9.771453  | 8.248881  | 7.998954  | H | 5.247444  | 5.004604  | 2.589221  |
| C | 7.530301  | 8.946692  | 6.648531  | H | 5.690297  | 5.758171  | 1.042675  |
| H | 8.360238  | 9.649529  | 6.482962  | C | 7.288923  | 7.793040  | 2.036929  |
| H | 6.958892  | 9.284292  | 7.529077  | H | 7.627815  | 7.574608  | 1.010993  |
| H | 6.869781  | 8.994266  | 5.771571  | H | 8.113832  | 8.274455  | 2.579167  |
| C | 10.869498 | 11.067536 | 0.668690  | H | 6.457156  | 8.510705  | 1.966068  |
| C | 11.195631 | 9.572333  | 0.470395  | C | 10.812127 | 4.242898  | 5.098927  |
| H | 10.303118 | 9.062382  | 0.076304  | H | 10.385463 | 4.789889  | 5.948827  |
| H | 12.005083 | 9.424630  | -0.260477 | C | 12.182481 | 4.868982  | 4.790350  |
| C | 10.795548 | 9.946774  | 2.817405  | H | 12.670841 | 4.358661  | 3.944644  |
| N | 10.500919 | 11.105719 | 2.109882  | H | 12.849706 | 4.784598  | 5.662680  |
| C | 11.530909 | 8.984306  | 1.852641  | H | 12.080668 | 5.932454  | 4.538205  |
| C | 9.709608  | 11.496638 | -0.239155 | C | 10.974113 | 2.770566  | 5.507314  |
| H | 10.022129 | 11.416507 | -1.292230 | H | 11.480609 | 2.190169  | 4.719200  |
| H | 9.414621  | 12.539788 | -0.051402 | H | 10.003972 | 2.288293  | 5.699404  |
| H | 8.830002  | 10.855262 | -0.097940 | H | 11.584543 | 2.687530  | 6.421306  |
| C | 13.040409 | 9.036719  | 2.161041  | C | 9.958639  | 12.301600 | 2.684801  |
| H | 13.599418 | 8.472701  | 1.396662  | C | 8.560934  | 12.522550 | 2.644145  |
| H | 13.244577 | 8.579898  | 3.138973  | C | 8.060380  | 13.776472 | 3.018677  |
| H | 13.432072 | 10.064120 | 2.179856  | H | 6.983932  | 13.956509 | 2.980271  |
| C | 11.062421 | 7.530416  | 1.955793  | C | 8.909948  | 14.789358 | 3.456614  |
| H | 9.986559  | 7.434299  | 1.769091  | H | 8.506022  | 15.767509 | 3.730528  |
| H | 11.253393 | 7.106040  | 2.947564  | C | 10.271675 | 14.531909 | 3.585369  |

H 10.928833 15.305263 3.989249  
 C 10.815744 13.290345 3.226017  
 C 7.582099 11.398474 2.346460  
 H 8.148543 10.571422 1.899971  
 C 7.024703 10.890265 3.685717  
 H 6.494921 11.694283 4.222583  
 H 7.848774 10.536243 4.318469  
 H 6.316512 10.061288 3.533124  
 C 6.458343 11.786551 1.378414  
 H 6.854277 12.199116 0.437984  
 H 5.781132 12.538444 1.815116  
 H 5.845348 10.904081 1.132814  
 C 12.274367 13.017782 3.562362  
 H 12.532118 12.030944 3.156110  
 C 12.420119 12.944581 5.093408  
 H 13.442164 12.646881 5.377612  
 H 11.714028 12.215861 5.514574  
 H 12.215684 13.925930 5.551680  
 C 13.252637 14.047639 2.980708  
 H 13.159271 14.137113 1.889024  
 H 14.291459 13.759751 3.210961  
 H 13.089020 15.048130 3.412787

### 3-Ph

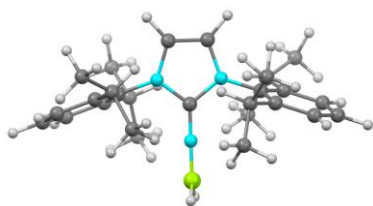

$E_{\text{SCF}} = -1239.349164150 \text{ Ha}$

Lowest IR frequency =  $28.03 \text{ cm}^{-1}$

B 10.665654 8.696669 4.859996  
 N 9.715127 7.674257 5.010523  
 N 10.530039 9.679387 3.851967  
 C 8.805770 7.045992 5.616596  
 N 8.281392 5.837748 5.194776  
 C 7.239876 5.267644 6.089513  
 C 6.910662 6.484793 6.988986  
 H 6.655942 6.174401 8.013356  
 H 6.030938 7.003325 6.576833  
 C 8.124614 7.434303 6.941260

C 7.762487 4.069430 6.900868  
 H 8.052216 3.245434 6.233211  
 H 6.968123 3.699570 7.567574  
 H 8.627906 4.331230 7.522699  
 C 6.003262 4.799806 5.313378  
 H 5.521818 5.627220 4.777423  
 H 5.267238 4.381403 6.017184  
 H 6.261799 4.014800 4.587054  
 C 9.126294 7.173736 8.083590  
 H 9.473840 6.130895 8.096436  
 H 8.655149 7.388848 9.056478  
 H 10.012283 7.815020 7.975859  
 C 7.707558 8.906053 6.951705  
 H 8.576898 9.561475 6.795951  
 H 7.249628 9.167942 7.919389  
 H 6.980453 9.120873 6.155885  
 C 10.686753 11.069164 0.518453  
 C 11.116195 9.595522 0.291882  
 H 10.244608 9.016666 -0.051216  
 H 11.890728 9.513062 -0.485809  
 C 10.790843 9.917887 2.639017  
 N 10.440112 11.085463 1.984416  
 C 11.581400 9.038585 1.651937  
 C 9.412689 11.394138 -0.273382  
 H 9.625912 11.348797 -1.352823  
 H 9.048901 12.406723 -0.041701  
 H 8.609412 10.677950 -0.055083  
 C 13.087164 9.273301 1.890020  
 H 13.677651 8.669350 1.181928  
 H 13.365695 8.981498 2.912319  
 H 13.374103 10.324691 1.757618  
 C 11.285505 7.545774 1.809523  
 H 10.217579 7.322365 1.704360  
 H 11.595096 7.178718 2.797899  
 H 11.835861 6.968948 1.049090  
 C 11.770947 12.075135 0.096601  
 H 11.892501 12.052542 -0.997267  
 H 12.746478 11.855633 0.547398  
 H 11.482415 13.097135 0.384310  
 C 8.744799 5.210635 3.994485  
 C 8.110367 5.509473 2.764424

C 8.560246 4.865177 1.604004  
H 8.076834 5.083329 0.649046  
C 9.625749 3.969128 1.642245  
H 9.961246 3.475042 0.726719  
C 10.280092 3.728556 2.847646  
H 11.143167 3.059215 2.866981  
C 9.865120 4.347839 4.034748  
C 7.013226 6.557810 2.636437  
H 6.742101 6.881800 3.649878  
C 5.751368 6.008631 1.953631  
H 4.942863 6.757386 1.981039  
H 5.387012 5.092690 2.441760  
H 5.938588 5.769124 0.894424  
C 7.531725 7.803122 1.899018  
H 7.901245 7.546294 0.892751  
H 8.347969 8.276740 2.460035  
H 6.723527 8.540633 1.776552  
C 10.695389 4.151019 5.294258  
H 10.164674 4.637754 6.119792  
C 12.042414 4.874895 5.150480  
H 12.651570 4.434153 4.343911  
H 12.621531 4.818169 6.086098  
H 11.876061 5.933569 4.920538  
C 10.891553 2.673875 5.660819  
H 11.493818 2.144908 4.904525  
H 9.931109 2.143717 5.750480  
H 11.423184 2.584682 6.622090  
C 9.960166 12.239530 2.683510  
C 8.570802 12.448529 2.839808  
C 8.131111 13.638437 3.436279  
H 7.059379 13.814605 3.553265  
C 9.037352 14.585223 3.907155  
H 8.677125 15.510167 4.365268  
C 10.404388 14.328990 3.828417  
H 11.111469 15.047003 4.249619  
C 10.889480 13.156064 3.234558

C 7.555110 11.366843 2.509850  
H 8.075376 10.592105 1.935898  
C 7.086098 10.708545 3.817875  
H 6.594270 11.442272 4.477789  
H 7.946588 10.283147 4.350967  
H 6.365721 9.899788 3.615820  
C 6.371212 11.865772 1.673270  
H 6.706246 12.357451 0.747247  
H 5.751417 12.586375 2.230798  
H 5.716892 11.023323 1.394575  
C 12.378299 12.853021 3.303373  
H 12.567986 11.993479 2.653129  
C 12.758162 12.421565 4.730267  
H 13.816211 12.115589 4.777042  
H 12.145992 11.571205 5.057878  
H 12.610826 13.247571 5.445727  
C 13.259996 14.009339 2.814937  
H 12.985485 14.330555 1.798228  
H 14.318600 13.702810 2.802291  
H 13.184726 14.888339 3.475304  
C 11.910032 8.825968 5.854163  
C 11.786841 9.610513 7.016423  
C 12.860309 9.801752 7.891119  
C 14.096276 9.206042 7.622810  
C 14.244996 8.425261 6.473334  
C 13.164999 8.244718 5.603266  
H 10.833490 10.100561 7.235773  
H 12.733511 10.421911 8.783095  
H 14.938934 9.352518 8.303897  
H 15.207726 7.956553 6.250533  
H 13.310058 7.634147 4.708477

## References

1. J. T. Goettel, H. Gao, S. Dotzauer and H. Braunschweig, *Chem. Eur. J.*, 2020, **26**, 1136–1143.
2. R. J. Brotherton, A. L. McCloskey, L. L. Petterson, H. Steinberg, *J. Am. Chem. Soc.* **1960**, *62*, 6042.
3. A. Eckert, H. Pritzkow and W. Siebert, *Eur. J. Inorg. Chem.*, 2002, 2064.
4. H. Braunschweig, Q. Ye and K. Radacki, *Chem. Commun.*, 2012, 48, 2701.
5. D. Kaufmann, *Chem. Ber.* 1987, *120*, 853–854.
6. H. C. Brown and N. Ravindran, *Inorg. Chem.*, 1977, **16**, 2938–2940
7. M. Arrowsmith, J. Böhnke, H. Braunschweig, A. Deißberger, R. D. Dewhurst, W. C. Ewing, C. Hörl, J. Mies, J. H. Muessig, *Chem. Commun.* **2017**, *53*, 8265–8267.
8. H. Hommer, H. Nöth, J. Knizek, W. Ponikwar, H. Schwenk-Kircher, *Eur. J. Inorg. Chem.* **1998**, 1519–1527.
9. R. Hunold, *Dissertation*, Philipps-Universität Marburg, **1988**.
10. G. Sheldrick, *Acta Cryst.*, 2015, **A71**, 3–8.
11. G. Sheldrick, *Acta Cryst.*, 2008, **A64**, 112–122.
12. TURBOMOLE V7.2 2017, a development of University of Karlsruhe and Forschungszentrum Karlsruhe GmbH, 1989–2007, TURBOMOLE GmbH, since 2007; available from <http://www.turbomole.com>.
13. TmoleX2022, Dassault Systèmes C. Steffen, K. Thomas, U. Huniar, A. Hellweg, O. Rubner and A. Schroer, *J. Comput. Chem.*, 2010, **31**, 2967–2970.
14. a) A. D. Becke, *J. Chem. Phys.*, 1993, **98**, 5648–5652; b) C. Lee, W. Yang and R. G. Parr, *Phys. Rev.* 1988, **37B**, 785–789; c) S. H. Vosko, L. Wilk and M. Nusair, *Can. J. Phys.*, 1980, **58**, 1200–1211; d) P. J. Stephens, F. J. Devlin, C. F. Chabalowski and M. J. Frisch, *J. Phys. Chem.*, 1994, **98**, 11623–11627.
15. S. Grimme, S. Ehrlich and L. Goerigk, *J. Comput. Chem.*, 2011, **32**, 1456–1465.
16. F. Weigend and R. Ahlrichs, *Phys. Chem. Chem. Phys.*, 2005, **7**, 3297–3305.
17. K. B. Wiberg, *Tetrahedron*, 1968, **24**, 1083–1096.
18. A. E. Reed, R. B. Weinstock and F. Weinhold, *J. Chem. Phys.*, 1985, **83**, 735–746.
19. J.-D. Chai and M. Head-Gordon, *Phys. Chem. Chem. Phys.*, 2008, **10**, 6615–6620.
20. H. Iikura, T. Tsuneda, T. Yanai and K. Hirao, *J. Chem. Phys.*, 2001, **115**, 3540–3544.
21. J. M. Tao, J. P. Perdew, V. N. Staroverov and G. E. Scuseria, *Phys. Rev. Lett.*, 2003, **91**, 146401.



22. F. Jensen, *J. Chem. Theory Comput.*, 2015, **11**, 132–138.
23. G. Scalmani and M. J. Frisch, *J. Chem. Phys.*, 2010, **132**, 114110.
24. Gaussian 16, Revision C.01. M. J. Frisch, G. W. Trucks, H. B. Schlegel, G. E. Scuseria, M. A. Robb, J. R. Cheeseman, G. Scalmani, V. Barone, G. A. Petersson, H. Nakatsuji, X. Li, M. Caricato, A. V. Marenich, J. Bloino, B. G. Janesko, R. Gomperts, B. Mennucci, H. P. Hratchian, J. V. Ortiz, A. F. Izmaylov, J. L. Sonnenberg, D. Williams-Young, F. Ding, F. Lipparini, F. Egidi, J. Goings, B. Peng, A. Petrone, T. Henderson, D. Ranasinghe, V. G. Zakrzewski, J. Gao, N. Rega, G. Zheng, W. Liang, M. Hada, M. Ehara, K. Toyota, R. Fukuda, J. Hasegawa, M. Ishida, T. Nakajima, Y. Honda, O. Kitao, H. Nakai, T. Vreven, K. Throssell, J. A. Montgomery, Jr., J. E. Peralta, F. Ogliaro, M. J. Bearpark, J. J. Heyd, E. N. Brothers, K. N. Kudin, V. N. Staroverov, T. A. Keith, R. Kobayashi, J. Normand, K. Raghavachari, A. P. Rendell, J. C. Burant, S. S. Iyengar, J. Tomasi, M. Cossi, J. M. Millam, M. Klene, C. Adamo, R. Cammi, J. W. Ochterski, R. L. Martin, K. Morokuma, O. Farkas, J. B. Foresman, and D. J. Fox, Gaussian, Inc., Wallingford CT, 2016.
